# Supplementary material
Source: publisher figshare collection journal article supplement (https://acs.figshare.com/ndownloader/files/4097608)
Supplement: Supplementary file 1 [file 4097608]

#=============================================================================

# 1. SUBMISSION DETAILS

_publ_contact_author_name         'Jian-Fang Ma'
_publ_contact_author_address
;
Key Lab of Polyoxometalate Science
Department of Chemistry
Northeast Normal University
Changchun 130024
P.R.China
;
_publ_contact_author_email        jianfangma@yahoo.com.cn
_publ_contact_author_fax          +86-431-85098620
_publ_contact_author_phone       +86-431-85098620
_publ_requested_journal           'Inorganic Chemistry'

#=============================================================================
data_1
 
_audit_creation_method            SHELXL-97
_chemical_name_systematic
;
 ?
;
_chemical_name_common             ?
_chemical_melting_point           ?
_chemical_formula_moiety          'C20 H25 As Cu2 Mo3 N12 O12'
_chemical_formula_sum
 'C20 H25 As Cu2 Mo3 N12 O12'
_chemical_formula_weight          1115.16
 
loop_
 _atom_type_symbol
 _atom_type_description
 _atom_type_scat_dispersion_real
 _atom_type_scat_dispersion_imag
 _atom_type_scat_source
 'C'  'C'   0.0030   0.0020
 'International Tables Vol C Tables 4.2.6.8 and 6.1.1.4'
 'H'  'H'   0.0000   0.0000
 'International Tables Vol C Tables 4.2.6.8 and 6.1.1.4'
 'As'  'As'   0.0500   2.0060
 'International Tables Vol C Tables 4.2.6.8 and 6.1.1.4'
 'Cu'  'Cu'   0.3200   1.2650
 'International Tables Vol C Tables 4.2.6.8 and 6.1.1.4'
 'Mo'  'Mo'  -1.6830   0.6860
 'International Tables Vol C Tables 4.2.6.8 and 6.1.1.4'
 'N'  'N'   0.0060   0.0030
 'International Tables Vol C Tables 4.2.6.8 and 6.1.1.4'
 'O'  'O'   0.0110   0.0060
 'International Tables Vol C Tables 4.2.6.8 and 6.1.1.4'
 
_symmetry_cell_setting           Monoclinic
_symmetry_space_group_name_H-M    P2(1)/c
                                     
loop_
 _symmetry_equiv_pos_as_xyz
 'x, y, z'
 '-x, y+1/2, -z+1/2'
 '-x, -y, -z'
 'x, -y-1/2, z-1/2'
 
_cell_length_a                    14.3901(4)
_cell_length_b                    12.5772(4)
_cell_length_c                    21.7574(8)
_cell_angle_alpha                 90.00
_cell_angle_beta                  124.537(2)
_cell_angle_gamma                 90.00
_cell_volume                      3243.81(18)
_cell_formula_units_Z             4
_cell_measurement_temperature     293(2)
_cell_measurement_reflns_used     7324
_cell_measurement_theta_min       3.0076
_cell_measurement_theta_max       29.1296
 
_exptl_crystal_description        block
_exptl_crystal_colour             yellow
_exptl_crystal_size_max           0.37
_exptl_crystal_size_mid           0.26
_exptl_crystal_size_min           0.23
_exptl_crystal_density_meas       ?
_exptl_crystal_density_diffrn     2.283
_exptl_crystal_density_method     'not measured'
_exptl_crystal_F_000              2167
_exptl_absorpt_coefficient_mu     3.508
_exptl_absorpt_correction_type    multi-scan
_exptl_absorpt_correction_T_min   0.3568
_exptl_absorpt_correction_T_max   0.4992
_exptl_absorpt_process_details    'CrysAlis (Oxiford Diffraciton, 2006)'
 
_exptl_special_details
;
 ?
;
 
_diffrn_ambient_temperature       293(2)
_diffrn_radiation_wavelength      0.71073
_diffrn_radiation_type            MoK\a
_diffrn_radiation_source          'fine-focus sealed tube'
_diffrn_radiation_monochromator   graphite
_diffrn_measurement_device_type    'Oxford Diffraction Gemini R Ultra'
_diffrn_measurement_method        '\w scan'
_diffrn_detector_area_resol_mean  10.0
_diffrn_standards_number          ?
_diffrn_standards_interval_count  ?
_diffrn_standards_interval_time   ?
_diffrn_standards_decay_%         ?
_diffrn_reflns_number             12764
_diffrn_reflns_av_R_equivalents   0.0263
_diffrn_reflns_av_sigmaI/netI     0.0478
_diffrn_reflns_limit_h_min        -17
_diffrn_reflns_limit_h_max        13
_diffrn_reflns_limit_k_min        -15
_diffrn_reflns_limit_k_max        12
_diffrn_reflns_limit_l_min        -25
_diffrn_reflns_limit_l_max        26
_diffrn_reflns_theta_min          3.01
_diffrn_reflns_theta_max          26.02
_reflns_number_total              6373
_reflns_number_gt                 4826
_reflns_threshold_expression      >2\s(I)
 
_computing_data_collection         'CrysAlis (Oxford Diffraction, 2006)'
_computing_cell_refinement        CrysAlis
_computing_data_reduction         CrysAlis
_computing_structure_solution     'SHELXL-97 (Sheldrick, 1997)'
_computing_structure_refinement   'SHELXL-97 (Sheldrick, 2008)'
_computing_molecular_graphics     ?
_computing_publication_material   ?
 
_refine_special_details
;
 Refinement of F^2^ against ALL reflections.  The weighted R-factor wR and
 goodness of fit S are based on F^2^, conventional R-factors R are based
 on F, with F set to zero for negative F^2^. The threshold expression of
 F^2^ > 2\s(F^2^) is used only for calculating R-factors(gt) etc. and is
 not relevant to the choice of reflections for refinement.  R-factors based
 on F^2^ are statistically about twice as large as those based on F, and R-
 factors based on ALL data will be even larger.
;
 
_refine_ls_structure_factor_coef  Fsqd
_refine_ls_matrix_type            full
_refine_ls_weighting_scheme       calc
_refine_ls_weighting_details
 'calc w=1/[\s^2^(Fo^2^)+(0.0233P)^2^+0.0000P] where P=(Fo^2^+2Fc^2^)/3'
_atom_sites_solution_primary      direct
_atom_sites_solution_secondary    difmap
_atom_sites_solution_hydrogens    geom
_refine_ls_hydrogen_treatment     constr
_refine_ls_extinction_method      none
_refine_ls_extinction_coef        ?
_refine_ls_number_reflns          6373
_refine_ls_number_parameters      454
_refine_ls_number_restraints      0
_refine_ls_R_factor_all           0.0390
_refine_ls_R_factor_gt            0.0247
_refine_ls_wR_factor_ref          0.0489
_refine_ls_wR_factor_gt           0.0475
_refine_ls_goodness_of_fit_ref    0.905
_refine_ls_restrained_S_all       0.905
_refine_ls_shift/su_max           0.001
_refine_ls_shift/su_mean          0.000
 
loop_
 _atom_site_label
 _atom_site_type_symbol
 _atom_site_fract_x
 _atom_site_fract_y
 _atom_site_fract_z
 _atom_site_U_iso_or_equiv
 _atom_site_adp_type
 _atom_site_occupancy
 _atom_site_symmetry_multiplicity
 _atom_site_calc_flag
 _atom_site_refinement_flags
 _atom_site_disorder_assembly
 _atom_site_disorder_group
Cu1 Cu 0.02039(3) -0.16430(4) -0.23525(2) 0.04275(13) Uani 1 1 d . . .
Cu2 Cu 1.0000 0.0000 0.0000 0.0560(2) Uani 1 2 d S . .
Cu3 Cu 0.5000 -0.5000 0.0000 0.0632(2) Uani 1 2 d S . .
As1 As -0.00776(2) -0.39289(2) 0.042137(16) 0.01643(8) Uani 1 1 d . . .
Mo1 Mo 0.01613(2) -0.34875(2) -0.112519(14) 0.02176(7) Uani 1 1 d . . .
Mo2 Mo -0.23166(2) -0.42867(2) -0.159108(14) 0.01923(7) Uani 1 1 d . . .
Mo3 Mo 0.25084(2) -0.41491(2) 0.046407(14) 0.01997(7) Uani 1 1 d . . .
C1 C 0.2470(3) -0.0736(3) -0.16584(19) 0.0367(9) Uani 1 1 d . . .
H1 H 0.2311 -0.0452 -0.2103 0.044 Uiso 1 1 calc R . .
C2 C 0.2285(3) -0.1560(3) -0.09007(18) 0.0332(9) Uani 1 1 d . . .
H2 H 0.2000 -0.1966 -0.0686 0.040 Uiso 1 1 calc R . .
C3 C 0.4191(3) -0.1229(3) 0.02599(17) 0.0343(9) Uani 1 1 d . . .
H3A H 0.3884 -0.1544 0.0516 0.041 Uiso 1 1 calc R . .
H3B H 0.4469 -0.0526 0.0467 0.041 Uiso 1 1 calc R . .
C4 C 0.5152(3) -0.1900(3) 0.03914(18) 0.0369(9) Uani 1 1 d . . .
H4A H 0.5596 -0.1499 0.0264 0.044 Uiso 1 1 calc R . .
H4B H 0.4859 -0.2526 0.0076 0.044 Uiso 1 1 calc R . .
C5 C 0.5882(3) -0.2227(3) 0.11970(19) 0.0450(10) Uani 1 1 d . . .
H5A H 0.6079 -0.1603 0.1510 0.054 Uiso 1 1 calc R . .
H5B H 0.5460 -0.2705 0.1303 0.054 Uiso 1 1 calc R . .
C6 C 0.7955(3) -0.3819(3) 0.13009(19) 0.0395(9) Uani 1 1 d . . .
H6 H 0.8213 -0.4351 0.1137 0.047 Uiso 1 1 calc R . .
C7 C 0.7948(3) -0.2581(3) 0.19419(19) 0.0440(11) Uani 1 1 d . . .
H7 H 0.8167 -0.2062 0.2304 0.053 Uiso 1 1 calc R . .
C8 C 0.7738(3) 0.0882(3) -0.0917(2) 0.0462(10) Uani 1 1 d . . .
H8 H 0.7955 0.1534 -0.0673 0.055 Uiso 1 1 calc R . .
C9 C 0.7836(3) -0.0666(3) -0.1235(2) 0.0409(10) Uani 1 1 d . . .
H9 H 0.8094 -0.1321 -0.1279 0.049 Uiso 1 1 calc R . .
C10 C 0.5767(3) -0.1002(3) -0.21240(19) 0.0324(8) Uani 1 1 d . . .
H10A H 0.5909 -0.1473 -0.2415 0.039 Uiso 1 1 calc R . .
H10B H 0.5142 -0.0541 -0.2466 0.039 Uiso 1 1 calc R . .
C11 C 0.5463(3) -0.1653(3) -0.16777(19) 0.0346(9) Uani 1 1 d . . .
H11A H 0.6139 -0.1984 -0.1262 0.042 Uiso 1 1 calc R . .
H11B H 0.5163 -0.1184 -0.1475 0.042 Uiso 1 1 calc R . .
C12 C 0.4606(3) -0.2500(3) -0.21412(18) 0.0334(9) Uani 1 1 d . . .
H12A H 0.3921 -0.2170 -0.2550 0.040 Uiso 1 1 calc R . .
H12B H 0.4896 -0.2961 -0.2353 0.040 Uiso 1 1 calc R . .
C13 C 0.3402(3) -0.3746(3) -0.1323(2) 0.0431(10) Uani 1 1 d . . .
H13 H 0.2809 -0.3899 -0.1280 0.052 Uiso 1 1 calc R . .
C14 C 0.5011(3) -0.3745(3) -0.11137(18) 0.0332(9) Uani 1 1 d . . .
H14 H 0.5769 -0.3870 -0.0912 0.040 Uiso 1 1 calc R . .
C15 C -0.0219(3) -0.2672(2) 0.08451(16) 0.0222(7) Uani 1 1 d . . .
C16 C 0.0683(3) -0.2295(3) 0.15091(19) 0.0361(9) Uani 1 1 d . . .
H16 H 0.1374 -0.2645 0.1754 0.043 Uiso 1 1 calc R . .
C17 C 0.0552(4) -0.1389(4) 0.1809(2) 0.0635(14) Uani 1 1 d . . .
H17 H 0.1153 -0.1131 0.2265 0.076 Uiso 1 1 calc R . .
C18 C -0.0457(4) -0.0871(4) 0.1438(3) 0.0780(17) Uani 1 1 d . . .
H18 H -0.0533 -0.0252 0.1640 0.094 Uiso 1 1 calc R . .
C19 C -0.1362(4) -0.1248(3) 0.0773(3) 0.0682(15) Uani 1 1 d . . .
H19 H -0.2047 -0.0888 0.0527 0.082 Uiso 1 1 calc R . .
C20 C -0.1250(3) -0.2165(3) 0.0471(2) 0.0417(10) Uani 1 1 d . . .
H20 H -0.1860 -0.2435 0.0023 0.050 Uiso 1 1 calc R . .
N1 N 0.1730(2) -0.1325(2) -0.16201(14) 0.0293(7) Uani 1 1 d . . .
N2 N 0.3440(2) -0.0594(3) -0.10155(16) 0.0423(8) Uani 1 1 d . . .
N3 N 0.3294(2) -0.1134(2) -0.05370(14) 0.0274(7) Uani 1 1 d . . .
N4 N 0.6911(2) -0.2755(3) 0.13789(15) 0.0364(8) Uani 1 1 d . . .
N5 N 0.6887(2) -0.3553(3) 0.09466(17) 0.0438(8) Uani 1 1 d . . .
N6 N 0.8641(2) -0.3245(2) 0.19260(15) 0.0368(8) Uani 1 1 d . . .
N7 N 0.8481(2) 0.0103(3) -0.07722(17) 0.0438(8) Uani 1 1 d . . .
N8 N 0.6687(3) 0.0641(2) -0.14308(19) 0.0446(8) Uani 1 1 d . . .
N9 N 0.6770(2) -0.0361(2) -0.16264(16) 0.0307(7) Uani 1 1 d . . .
N10 N 0.4345(2) -0.3133(2) -0.16977(14) 0.0286(7) Uani 1 1 d . . .
N11 N 0.3300(2) -0.3115(3) -0.18375(17) 0.0441(8) Uani 1 1 d . . .
N12 N 0.4451(2) -0.4152(2) -0.08583(15) 0.0339(7) Uani 1 1 d . . .
O1 O -0.03568(19) -0.22294(18) -0.14029(12) 0.0362(6) Uani 1 1 d . . .
O2 O 0.08263(19) -0.3725(2) -0.15566(12) 0.0380(6) Uani 1 1 d . . .
O3 O -0.11690(16) -0.43077(16) -0.17776(10) 0.0205(5) Uani 1 1 d . . .
O4 O -0.06774(16) -0.36504(16) -0.04937(10) 0.0195(5) Uani 1 1 d . . .
O5 O -0.27919(18) -0.30190(18) -0.18708(12) 0.0332(6) Uani 1 1 d . . .
O6 O -0.32773(17) -0.50528(19) -0.23240(11) 0.0312(6) Uani 1 1 d . . .
O7 O 0.13178(16) -0.42209(16) 0.08843(10) 0.0200(5) Uani 1 1 d . . .
O8 O -0.27642(16) -0.44939(16) -0.09262(11) 0.0219(5) Uani 1 1 d . . .
O9 O -0.08136(16) -0.49225(16) 0.04934(10) 0.0199(5) Uani 1 1 d . . .
O10 O 0.34638(18) -0.33745(18) 0.11940(12) 0.0325(6) Uani 1 1 d . . .
O11 O 0.31036(18) -0.43921(19) -0.00087(12) 0.0334(6) Uani 1 1 d . . .
O12 O 0.14388(16) -0.30864(15) -0.01495(10) 0.0206(5) Uani 1 1 d . . .
 
loop_
 _atom_site_aniso_label
 _atom_site_aniso_U_11
 _atom_site_aniso_U_22
 _atom_site_aniso_U_33
 _atom_site_aniso_U_23
 _atom_site_aniso_U_13
 _atom_site_aniso_U_12
Cu1 0.0222(2) 0.0563(3) 0.0317(2) 0.0040(2) 0.0045(2) -0.0110(2)
Cu2 0.0292(4) 0.0554(5) 0.0614(5) -0.0099(4) 0.0125(3) -0.0117(4)
Cu3 0.1022(7) 0.0474(5) 0.0485(4) 0.0227(4) 0.0479(5) 0.0183(5)
As1 0.01586(15) 0.01794(17) 0.01631(15) -0.00107(13) 0.00960(13) 0.00006(13)
Mo1 0.01867(14) 0.02764(16) 0.01715(14) 0.00262(13) 0.00907(12) -0.00515(13)
Mo2 0.01592(13) 0.02324(15) 0.01824(13) 0.00072(12) 0.00952(11) 0.00009(12)
Mo3 0.01728(13) 0.02410(16) 0.01932(13) 0.00039(12) 0.01084(12) -0.00098(12)
C1 0.0291(19) 0.047(2) 0.0296(19) 0.0111(18) 0.0142(17) -0.0066(18)
C2 0.0233(18) 0.039(2) 0.0304(19) 0.0066(17) 0.0113(16) -0.0069(17)
C3 0.0203(17) 0.048(2) 0.0218(17) 0.0003(17) 0.0044(15) 0.0037(17)
C4 0.0285(19) 0.046(2) 0.0280(18) 0.0010(17) 0.0112(16) 0.0096(18)
C5 0.0292(19) 0.067(3) 0.035(2) 0.007(2) 0.0162(18) 0.018(2)
C6 0.0288(19) 0.044(2) 0.037(2) -0.0080(19) 0.0135(17) 0.0033(18)
C7 0.031(2) 0.061(3) 0.0218(18) -0.0110(19) 0.0046(17) 0.016(2)
C8 0.046(2) 0.032(2) 0.059(3) -0.014(2) 0.029(2) -0.009(2)
C9 0.0299(19) 0.031(2) 0.054(2) -0.005(2) 0.0189(19) 0.0007(18)
C10 0.0250(18) 0.034(2) 0.0340(19) -0.0001(17) 0.0145(16) -0.0040(16)
C11 0.0304(19) 0.038(2) 0.0354(19) 0.0004(18) 0.0186(17) -0.0042(17)
C12 0.036(2) 0.034(2) 0.0299(18) 0.0032(17) 0.0185(17) -0.0069(18)
C13 0.031(2) 0.058(3) 0.047(2) 0.013(2) 0.0264(19) -0.001(2)
C14 0.0271(18) 0.039(2) 0.0327(19) 0.0081(17) 0.0162(17) 0.0089(17)
C15 0.0281(17) 0.0182(17) 0.0230(16) -0.0003(14) 0.0161(15) 0.0028(15)
C16 0.038(2) 0.034(2) 0.036(2) -0.0105(18) 0.0201(18) 0.0029(18)
C17 0.055(3) 0.065(3) 0.055(3) -0.033(3) 0.022(2) -0.003(3)
C18 0.081(4) 0.055(3) 0.088(4) -0.040(3) 0.042(3) 0.007(3)
C19 0.068(3) 0.055(3) 0.077(3) -0.006(3) 0.038(3) 0.033(3)
C20 0.036(2) 0.045(2) 0.037(2) -0.0045(19) 0.0168(19) 0.0101(19)
N1 0.0213(14) 0.0337(17) 0.0256(15) 0.0054(13) 0.0088(12) -0.0030(13)
N2 0.0303(17) 0.056(2) 0.0381(18) 0.0057(16) 0.0177(15) -0.0144(16)
N3 0.0175(14) 0.0332(17) 0.0249(14) 0.0054(13) 0.0081(12) -0.0018(13)
N4 0.0203(15) 0.055(2) 0.0253(15) -0.0030(15) 0.0077(13) 0.0106(15)
N5 0.0282(17) 0.047(2) 0.0396(18) -0.0144(17) 0.0094(15) -0.0013(16)
N6 0.0274(16) 0.049(2) 0.0247(15) -0.0054(15) 0.0094(14) 0.0097(15)
N7 0.0336(17) 0.0377(19) 0.051(2) -0.0079(17) 0.0188(16) -0.0072(16)
N8 0.0421(19) 0.0264(18) 0.064(2) -0.0064(17) 0.0294(18) -0.0009(16)
N9 0.0250(15) 0.0269(16) 0.0362(16) 0.0004(14) 0.0150(14) -0.0006(13)
N10 0.0220(14) 0.0337(17) 0.0278(15) 0.0076(14) 0.0127(13) 0.0015(13)
N11 0.0241(16) 0.057(2) 0.0472(19) 0.0174(17) 0.0177(15) 0.0049(15)
N12 0.0374(17) 0.0338(18) 0.0320(16) 0.0083(14) 0.0205(15) 0.0026(15)
O1 0.0346(13) 0.0309(14) 0.0285(13) 0.0079(11) 0.0092(11) -0.0046(11)
O2 0.0335(13) 0.0578(17) 0.0301(13) -0.0034(12) 0.0224(12) -0.0099(12)
O3 0.0180(10) 0.0283(12) 0.0154(10) -0.0021(9) 0.0095(9) -0.0036(10)
O4 0.0189(10) 0.0254(12) 0.0152(10) 0.0007(9) 0.0103(9) 0.0006(10)
O5 0.0302(13) 0.0313(14) 0.0379(13) 0.0094(11) 0.0192(11) 0.0075(11)
O6 0.0240(12) 0.0427(15) 0.0238(12) -0.0082(11) 0.0116(10) -0.0087(11)
O7 0.0175(10) 0.0244(12) 0.0198(10) -0.0003(9) 0.0116(9) 0.0011(10)
O8 0.0193(11) 0.0271(12) 0.0227(11) 0.0034(10) 0.0140(10) 0.0058(10)
O9 0.0176(10) 0.0225(12) 0.0195(10) 0.0020(10) 0.0104(9) 0.0005(9)
O10 0.0264(12) 0.0381(14) 0.0253(12) -0.0063(11) 0.0101(10) -0.0067(11)
O11 0.0314(13) 0.0450(15) 0.0321(12) 0.0015(11) 0.0231(11) 0.0031(12)
O12 0.0207(11) 0.0173(11) 0.0208(11) 0.0004(9) 0.0100(9) -0.0045(9)
 
_geom_special_details
;
 All s.u.'s (except the s.u. in the dihedral angle between two l.s. planes)
 are estimated using the full covariance matrix.  The cell s.u.'s are taken
 into account individually in the estimation of s.u.'s in distances, angles
 and torsion angles; correlations between s.u.'s in cell parameters are only
 used when they are defined by crystal symmetry.  An approximate (isotropic)
 treatment of cell s.u.'s is used for estimating s.u.'s involving l.s. planes.
;
 
loop_
 _geom_bond_atom_site_label_1
 _geom_bond_atom_site_label_2
 _geom_bond_distance
 _geom_bond_site_symmetry_2
 _geom_bond_publ_flag
Cu1 N6 1.881(3) 4_455 ?
Cu1 N1 1.885(3) . ?
Cu2 N7 1.858(3) 3_755 ?
Cu2 N7 1.858(3) . ?
Cu3 N12 1.891(3) . ?
Cu3 N12 1.891(3) 3_645 ?
As1 O4 1.6979(18) . ?
As1 O7 1.6994(19) . ?
As1 O9 1.702(2) . ?
As1 C15 1.899(3) . ?
Mo1 O2 1.704(2) . ?
Mo1 O1 1.707(2) . ?
Mo1 O3 1.9138(19) . ?
Mo1 O12 1.9276(19) . ?
Mo1 O4 2.295(2) . ?
Mo1 O9 2.304(2) 3_545 ?
Mo1 Mo2 3.2639(4) . ?
Mo1 Mo3 3.2885(4) . ?
Mo2 O6 1.698(2) . ?
Mo2 O5 1.705(2) . ?
Mo2 O8 1.906(2) . ?
Mo2 O3 1.911(2) . ?
Mo2 O7 2.334(2) 3_545 ?
Mo2 O4 2.3493(19) . ?
Mo2 Mo3 3.2752(4) 3_545 ?
Mo3 O11 1.698(2) . ?
Mo3 O10 1.699(2) . ?
Mo3 O12 1.8995(19) . ?
Mo3 O8 1.908(2) 3_545 ?
Mo3 O7 2.357(2) . ?
Mo3 O9 2.4270(19) 3_545 ?
Mo3 Mo2 3.2752(4) 3_545 ?
C1 N2 1.313(4) . ?
C1 N1 1.338(4) . ?
C1 H1 0.9300 . ?
C2 N3 1.311(4) . ?
C2 N1 1.326(4) . ?
C2 H2 0.9300 . ?
C3 N3 1.466(4) . ?
C3 C4 1.502(5) . ?
C3 H3A 0.9700 . ?
C3 H3B 0.9700 . ?
C4 C5 1.503(5) . ?
C4 H4A 0.9700 . ?
C4 H4B 0.9700 . ?
C5 N4 1.458(4) . ?
C5 H5A 0.9700 . ?
C5 H5B 0.9700 . ?
C6 N5 1.313(4) . ?
C6 N6 1.350(4) . ?
C6 H6 0.9300 . ?
C7 N4 1.305(4) . ?
C7 N6 1.316(4) . ?
C7 H7 0.9300 . ?
C8 N8 1.309(5) . ?
C8 N7 1.349(5) . ?
C8 H8 0.9300 . ?
C9 N9 1.321(4) . ?
C9 N7 1.324(4) . ?
C9 H9 0.9300 . ?
C10 N9 1.461(4) . ?
C10 C11 1.512(5) . ?
C10 H10A 0.9700 . ?
C10 H10B 0.9700 . ?
C11 C12 1.505(4) . ?
C11 H11A 0.9700 . ?
C11 H11B 0.9700 . ?
C12 N10 1.455(4) . ?
C12 H12A 0.9700 . ?
C12 H12B 0.9700 . ?
C13 N11 1.310(5) . ?
C13 N12 1.353(4) . ?
C13 H13 0.9300 . ?
C14 N12 1.314(4) . ?
C14 N10 1.321(4) . ?
C14 H14 0.9300 . ?
C15 C16 1.368(4) . ?
C15 C20 1.379(4) . ?
C16 C17 1.379(5) . ?
C16 H16 0.9300 . ?
C17 C18 1.362(6) . ?
C17 H17 0.9300 . ?
C18 C19 1.370(6) . ?
C18 H18 0.9300 . ?
C19 C20 1.382(5) . ?
C19 H19 0.9300 . ?
C20 H20 0.9300 . ?
N2 N3 1.355(4) . ?
N4 N5 1.363(4) . ?
N6 Cu1 1.881(3) 4_656 ?
N8 N9 1.357(4) . ?
N10 N11 1.355(4) . ?
O7 Mo2 2.334(2) 3_545 ?
O8 Mo3 1.908(2) 3_545 ?
O9 Mo1 2.304(2) 3_545 ?
O9 Mo3 2.4270(19) 3_545 ?
 
loop_
 _geom_angle_atom_site_label_1
 _geom_angle_atom_site_label_2
 _geom_angle_atom_site_label_3
 _geom_angle
 _geom_angle_site_symmetry_1
 _geom_angle_site_symmetry_3
 _geom_angle_publ_flag
N6 Cu1 N1 171.85(13) 4_455 . ?
N7 Cu2 N7 180.0(3) 3_755 . ?
N12 Cu3 N12 180.00(19) . 3_645 ?
O4 As1 O7 112.58(10) . . ?
O4 As1 O9 109.28(9) . . ?
O7 As1 O9 112.00(9) . . ?
O4 As1 C15 105.93(11) . . ?
O7 As1 C15 107.96(11) . . ?
O9 As1 C15 108.84(12) . . ?
O2 Mo1 O1 103.68(12) . . ?
O2 Mo1 O3 97.75(10) . . ?
O1 Mo1 O3 100.64(9) . . ?
O2 Mo1 O12 99.77(10) . . ?
O1 Mo1 O12 95.72(9) . . ?
O3 Mo1 O12 152.42(8) . . ?
O2 Mo1 O4 164.62(10) . . ?
O1 Mo1 O4 91.28(10) . . ?
O3 Mo1 O4 75.62(8) . . ?
O12 Mo1 O4 82.00(8) . . ?
O2 Mo1 O9 90.59(10) . 3_545 ?
O1 Mo1 O9 164.65(10) . 3_545 ?
O3 Mo1 O9 82.67(8) . 3_545 ?
O12 Mo1 O9 76.02(7) . 3_545 ?
O4 Mo1 O9 74.93(7) . 3_545 ?
O2 Mo1 Mo2 129.10(8) . . ?
O1 Mo1 Mo2 89.69(8) . . ?
O3 Mo1 Mo2 31.40(6) . . ?
O12 Mo1 Mo2 127.91(6) . . ?
O4 Mo1 Mo2 46.03(5) . . ?
O9 Mo1 Mo2 85.52(5) 3_545 . ?
O2 Mo1 Mo3 88.40(8) . . ?
O1 Mo1 Mo3 126.08(7) . . ?
O3 Mo1 Mo3 129.99(6) . . ?
O12 Mo1 Mo3 30.51(6) . . ?
O4 Mo1 Mo3 85.59(5) . . ?
O9 Mo1 Mo3 47.53(5) 3_545 . ?
Mo2 Mo1 Mo3 122.586(11) . . ?
O6 Mo2 O5 104.31(11) . . ?
O6 Mo2 O8 100.92(10) . . ?
O5 Mo2 O8 99.15(10) . . ?
O6 Mo2 O3 97.72(10) . . ?
O5 Mo2 O3 99.04(10) . . ?
O8 Mo2 O3 149.76(8) . . ?
O6 Mo2 O7 91.82(9) . 3_545 ?
O5 Mo2 O7 163.65(9) . 3_545 ?
O8 Mo2 O7 74.74(8) . 3_545 ?
O3 Mo2 O7 81.10(8) . 3_545 ?
O6 Mo2 O4 164.07(9) . . ?
O5 Mo2 O4 90.73(9) . . ?
O8 Mo2 O4 81.48(8) . . ?
O3 Mo2 O4 74.34(7) . . ?
O7 Mo2 O4 73.49(7) 3_545 . ?
O6 Mo2 Mo1 129.12(8) . . ?
O5 Mo2 Mo1 88.25(8) . . ?
O8 Mo2 Mo1 125.89(6) . . ?
O3 Mo2 Mo1 31.45(6) . . ?
O7 Mo2 Mo1 83.50(5) 3_545 . ?
O4 Mo2 Mo1 44.67(5) . . ?
O6 Mo2 Mo3 89.59(8) . 3_545 ?
O5 Mo2 Mo3 129.93(8) . 3_545 ?
O8 Mo2 Mo3 30.83(6) . 3_545 ?
O3 Mo2 Mo3 126.90(6) . 3_545 ?
O7 Mo2 Mo3 46.01(5) 3_545 3_545 ?
O4 Mo2 Mo3 84.60(5) . 3_545 ?
Mo1 Mo2 Mo3 119.565(10) . 3_545 ?
O11 Mo3 O10 104.52(11) . . ?
O11 Mo3 O12 100.78(10) . . ?
O10 Mo3 O12 99.05(10) . . ?
O11 Mo3 O8 98.36(10) . 3_545 ?
O10 Mo3 O8 102.02(10) . 3_545 ?
O12 Mo3 O8 146.85(8) . 3_545 ?
O11 Mo3 O7 162.78(9) . . ?
O10 Mo3 O7 92.32(9) . . ?
O12 Mo3 O7 79.75(8) . . ?
O8 Mo3 O7 74.14(8) 3_545 . ?
O11 Mo3 O9 90.00(9) . 3_545 ?
O10 Mo3 O9 164.84(9) . 3_545 ?
O12 Mo3 O9 73.48(7) . 3_545 ?
O8 Mo3 O9 79.73(7) 3_545 3_545 ?
O7 Mo3 O9 73.55(7) . 3_545 ?
O11 Mo3 Mo2 129.12(8) . 3_545 ?
O10 Mo3 Mo2 90.67(8) . 3_545 ?
O12 Mo3 Mo2 124.76(6) . 3_545 ?
O8 Mo3 Mo2 30.80(6) 3_545 3_545 ?
O7 Mo3 Mo2 45.43(5) . 3_545 ?
O9 Mo3 Mo2 83.30(5) 3_545 3_545 ?
O11 Mo3 Mo1 88.78(7) . . ?
O10 Mo3 Mo1 129.96(8) . . ?
O12 Mo3 Mo1 31.01(6) . . ?
O8 Mo3 Mo1 123.84(6) 3_545 . ?
O7 Mo3 Mo1 83.02(5) . . ?
O9 Mo3 Mo1 44.44(5) 3_545 . ?
Mo2 Mo3 Mo1 117.836(10) 3_545 . ?
N2 C1 N1 114.3(3) . . ?
N2 C1 H1 122.8 . . ?
N1 C1 H1 122.8 . . ?
N3 C2 N1 110.0(3) . . ?
N3 C2 H2 125.0 . . ?
N1 C2 H2 125.0 . . ?
N3 C3 C4 111.6(3) . . ?
N3 C3 H3A 109.3 . . ?
C4 C3 H3A 109.3 . . ?
N3 C3 H3B 109.3 . . ?
C4 C3 H3B 109.3 . . ?
H3A C3 H3B 108.0 . . ?
C3 C4 C5 109.6(3) . . ?
C3 C4 H4A 109.7 . . ?
C5 C4 H4A 109.7 . . ?
C3 C4 H4B 109.7 . . ?
C5 C4 H4B 109.7 . . ?
H4A C4 H4B 108.2 . . ?
N4 C5 C4 111.9(3) . . ?
N4 C5 H5A 109.2 . . ?
C4 C5 H5A 109.2 . . ?
N4 C5 H5B 109.2 . . ?
C4 C5 H5B 109.2 . . ?
H5A C5 H5B 107.9 . . ?
N5 C6 N6 113.6(3) . . ?
N5 C6 H6 123.2 . . ?
N6 C6 H6 123.2 . . ?
N4 C7 N6 110.5(3) . . ?
N4 C7 H7 124.8 . . ?
N6 C7 H7 124.8 . . ?
N8 C8 N7 114.3(3) . . ?
N8 C8 H8 122.9 . . ?
N7 C8 H8 122.9 . . ?
N9 C9 N7 109.6(3) . . ?
N9 C9 H9 125.2 . . ?
N7 C9 H9 125.2 . . ?
N9 C10 C11 110.3(3) . . ?
N9 C10 H10A 109.6 . . ?
C11 C10 H10A 109.6 . . ?
N9 C10 H10B 109.6 . . ?
C11 C10 H10B 109.6 . . ?
H10A C10 H10B 108.1 . . ?
C12 C11 C10 112.2(3) . . ?
C12 C11 H11A 109.2 . . ?
C10 C11 H11A 109.2 . . ?
C12 C11 H11B 109.2 . . ?
C10 C11 H11B 109.2 . . ?
H11A C11 H11B 107.9 . . ?
N10 C12 C11 111.4(3) . . ?
N10 C12 H12A 109.4 . . ?
C11 C12 H12A 109.4 . . ?
N10 C12 H12B 109.4 . . ?
C11 C12 H12B 109.4 . . ?
H12A C12 H12B 108.0 . . ?
N11 C13 N12 113.9(3) . . ?
N11 C13 H13 123.1 . . ?
N12 C13 H13 123.1 . . ?
N12 C14 N10 110.5(3) . . ?
N12 C14 H14 124.8 . . ?
N10 C14 H14 124.8 . . ?
C16 C15 C20 121.5(3) . . ?
C16 C15 As1 120.2(2) . . ?
C20 C15 As1 118.3(2) . . ?
C15 C16 C17 119.0(4) . . ?
C15 C16 H16 120.5 . . ?
C17 C16 H16 120.5 . . ?
C18 C17 C16 120.0(4) . . ?
C18 C17 H17 120.0 . . ?
C16 C17 H17 120.0 . . ?
C17 C18 C19 121.1(4) . . ?
C17 C18 H18 119.5 . . ?
C19 C18 H18 119.5 . . ?
C18 C19 C20 119.7(4) . . ?
C18 C19 H19 120.2 . . ?
C20 C19 H19 120.2 . . ?
C15 C20 C19 118.8(4) . . ?
C15 C20 H20 120.6 . . ?
C19 C20 H20 120.6 . . ?
C2 N1 C1 103.2(3) . . ?
C2 N1 Cu1 125.8(2) . . ?
C1 N1 Cu1 130.7(2) . . ?
C1 N2 N3 102.5(3) . . ?
C2 N3 N2 110.0(3) . . ?
C2 N3 C3 127.7(3) . . ?
N2 N3 C3 122.2(3) . . ?
C7 N4 N5 109.8(3) . . ?
C7 N4 C5 128.6(3) . . ?
N5 N4 C5 121.6(3) . . ?
C6 N5 N4 102.7(3) . . ?
C7 N6 C6 103.5(3) . . ?
C7 N6 Cu1 126.2(2) . 4_656 ?
C6 N6 Cu1 130.3(3) . 4_656 ?
C9 N7 C8 103.4(3) . . ?
C9 N7 Cu2 126.5(3) . . ?
C8 N7 Cu2 129.2(3) . . ?
C8 N8 N9 102.6(3) . . ?
C9 N9 N8 110.1(3) . . ?
C9 N9 C10 128.0(3) . . ?
N8 N9 C10 121.3(3) . . ?
C14 N10 N11 109.5(3) . . ?
C14 N10 C12 129.6(3) . . ?
N11 N10 C12 120.9(3) . . ?
C13 N11 N10 103.0(3) . . ?
C14 N12 C13 103.2(3) . . ?
C14 N12 Cu3 128.7(2) . . ?
C13 N12 Cu3 127.9(3) . . ?
Mo2 O3 Mo1 117.15(10) . . ?
As1 O4 Mo1 129.06(10) . . ?
As1 O4 Mo2 132.18(11) . . ?
Mo1 O4 Mo2 89.29(7) . . ?
As1 O7 Mo2 130.06(11) . 3_545 ?
As1 O7 Mo3 129.52(10) . . ?
Mo2 O7 Mo3 88.56(7) 3_545 . ?
Mo2 O8 Mo3 118.37(10) . 3_545 ?
As1 O9 Mo1 128.91(10) . 3_545 ?
As1 O9 Mo3 130.48(10) . 3_545 ?
Mo1 O9 Mo3 88.04(7) 3_545 3_545 ?
Mo3 O12 Mo1 118.47(10) . . ?
 
loop_
 _geom_torsion_atom_site_label_1
 _geom_torsion_atom_site_label_2
 _geom_torsion_atom_site_label_3
 _geom_torsion_atom_site_label_4
 _geom_torsion
 _geom_torsion_site_symmetry_1
 _geom_torsion_site_symmetry_2
 _geom_torsion_site_symmetry_3
 _geom_torsion_site_symmetry_4
 _geom_torsion_publ_flag
O2 Mo1 Mo2 O6 0.34(15) . . . . ?
O1 Mo1 Mo2 O6 107.82(13) . . . . ?
O3 Mo1 Mo2 O6 -3.49(15) . . . . ?
O12 Mo1 Mo2 O6 -155.17(13) . . . . ?
O4 Mo1 Mo2 O6 -160.10(12) . . . . ?
O9 Mo1 Mo2 O6 -86.77(11) 3_545 . . . ?
Mo3 Mo1 Mo2 O6 -118.12(10) . . . . ?
O2 Mo1 Mo2 O5 -106.74(13) . . . . ?
O1 Mo1 Mo2 O5 0.74(11) . . . . ?
O3 Mo1 Mo2 O5 -110.57(14) . . . . ?
O12 Mo1 Mo2 O5 97.75(11) . . . . ?
O4 Mo1 Mo2 O5 92.81(10) . . . . ?
O9 Mo1 Mo2 O5 166.14(9) 3_545 . . . ?
Mo3 Mo1 Mo2 O5 134.79(8) . . . . ?
O2 Mo1 Mo2 O8 153.23(13) . . . . ?
O1 Mo1 Mo2 O8 -99.29(11) . . . . ?
O3 Mo1 Mo2 O8 149.39(14) . . . . ?
O12 Mo1 Mo2 O8 -2.28(11) . . . . ?
O4 Mo1 Mo2 O8 -7.22(10) . . . . ?
O9 Mo1 Mo2 O8 66.11(9) 3_545 . . . ?
Mo3 Mo1 Mo2 O8 34.76(8) . . . . ?
O2 Mo1 Mo2 O3 3.83(16) . . . . ?
O1 Mo1 Mo2 O3 111.31(14) . . . . ?
O12 Mo1 Mo2 O3 -151.68(14) . . . . ?
O4 Mo1 Mo2 O3 -156.61(13) . . . . ?
O9 Mo1 Mo2 O3 -83.28(13) 3_545 . . . ?
Mo3 Mo1 Mo2 O3 -114.63(12) . . . . ?
O2 Mo1 Mo2 O7 87.40(12) . . . 3_545 ?
O1 Mo1 Mo2 O7 -165.13(9) . . . 3_545 ?
O3 Mo1 Mo2 O7 83.56(12) . . . 3_545 ?
O12 Mo1 Mo2 O7 -68.12(9) . . . 3_545 ?
O4 Mo1 Mo2 O7 -73.05(8) . . . 3_545 ?
O9 Mo1 Mo2 O7 0.28(7) 3_545 . . 3_545 ?
Mo3 Mo1 Mo2 O7 -31.07(5) . . . 3_545 ?
O2 Mo1 Mo2 O4 160.45(13) . . . . ?
O1 Mo1 Mo2 O4 -92.08(10) . . . . ?
O3 Mo1 Mo2 O4 156.61(13) . . . . ?
O12 Mo1 Mo2 O4 4.94(10) . . . . ?
O9 Mo1 Mo2 O4 73.33(9) 3_545 . . . ?
Mo3 Mo1 Mo2 O4 41.98(7) . . . . ?
O2 Mo1 Mo2 Mo3 117.13(11) . . . 3_545 ?
O1 Mo1 Mo2 Mo3 -135.39(8) . . . 3_545 ?
O3 Mo1 Mo2 Mo3 113.30(12) . . . 3_545 ?
O12 Mo1 Mo2 Mo3 -38.38(8) . . . 3_545 ?
O4 Mo1 Mo2 Mo3 -43.31(7) . . . 3_545 ?
O9 Mo1 Mo2 Mo3 30.02(5) 3_545 . . 3_545 ?
Mo3 Mo1 Mo2 Mo3 -1.33(2) . . . 3_545 ?
O2 Mo1 Mo3 O11 -1.03(12) . . . . ?
O1 Mo1 Mo3 O11 -106.84(13) . . . . ?
O3 Mo1 Mo3 O11 97.75(11) . . . . ?
O12 Mo1 Mo3 O11 -113.48(14) . . . . ?
O4 Mo1 Mo3 O11 164.80(10) . . . . ?
O9 Mo1 Mo3 O11 91.24(11) 3_545 . . . ?
Mo2 Mo1 Mo3 O11 135.93(8) . . . . ?
O2 Mo1 Mo3 O10 106.98(14) . . . . ?
O1 Mo1 Mo3 O10 1.18(15) . . . . ?
O3 Mo1 Mo3 O10 -154.24(13) . . . . ?
O12 Mo1 Mo3 O10 -5.46(16) . . . . ?
O4 Mo1 Mo3 O10 -87.19(12) . . . . ?
O9 Mo1 Mo3 O10 -160.74(13) 3_545 . . . ?
Mo2 Mo1 Mo3 O10 -116.06(11) . . . . ?
O2 Mo1 Mo3 O12 112.44(15) . . . . ?
O1 Mo1 Mo3 O12 6.64(16) . . . . ?
O3 Mo1 Mo3 O12 -148.78(15) . . . . ?
O4 Mo1 Mo3 O12 -81.73(13) . . . . ?
O9 Mo1 Mo3 O12 -155.28(14) 3_545 . . . ?
Mo2 Mo1 Mo3 O12 -110.60(12) . . . . ?
O2 Mo1 Mo3 O8 -100.28(11) . . . 3_545 ?
O1 Mo1 Mo3 O8 153.91(13) . . . 3_545 ?
O3 Mo1 Mo3 O8 -1.51(11) . . . 3_545 ?
O12 Mo1 Mo3 O8 147.27(14) . . . 3_545 ?
O4 Mo1 Mo3 O8 65.55(9) . . . 3_545 ?
O9 Mo1 Mo3 O8 -8.01(10) 3_545 . . 3_545 ?
Mo2 Mo1 Mo3 O8 36.68(8) . . . 3_545 ?
O2 Mo1 Mo3 O7 -165.86(10) . . . . ?
O1 Mo1 Mo3 O7 88.34(12) . . . . ?
O3 Mo1 Mo3 O7 -67.08(9) . . . . ?
O12 Mo1 Mo3 O7 81.70(13) . . . . ?
O4 Mo1 Mo3 O7 -0.03(7) . . . . ?
O9 Mo1 Mo3 O7 -73.58(8) 3_545 . . . ?
Mo2 Mo1 Mo3 O7 -28.90(5) . . . . ?
O2 Mo1 Mo3 O9 -92.27(11) . . . 3_545 ?
O1 Mo1 Mo3 O9 161.92(13) . . . 3_545 ?
O3 Mo1 Mo3 O9 6.50(10) . . . 3_545 ?
O12 Mo1 Mo3 O9 155.28(14) . . . 3_545 ?
O4 Mo1 Mo3 O9 73.56(8) . . . 3_545 ?
Mo2 Mo1 Mo3 O9 44.69(7) . . . 3_545 ?
O2 Mo1 Mo3 Mo2 -135.65(8) . . . 3_545 ?
O1 Mo1 Mo3 Mo2 118.54(11) . . . 3_545 ?
O3 Mo1 Mo3 Mo2 -36.87(8) . . . 3_545 ?
O12 Mo1 Mo3 Mo2 111.91(12) . . . 3_545 ?
O4 Mo1 Mo3 Mo2 30.18(5) . . . 3_545 ?
O9 Mo1 Mo3 Mo2 -43.38(7) 3_545 . . 3_545 ?
Mo2 Mo1 Mo3 Mo2 1.31(2) . . . 3_545 ?
N3 C3 C4 C5 -164.3(3) . . . . ?
C3 C4 C5 N4 -172.1(3) . . . . ?
N9 C10 C11 C12 -167.2(3) . . . . ?
C10 C11 C12 N10 178.6(3) . . . . ?
O4 As1 C15 C16 -133.9(3) . . . . ?
O7 As1 C15 C16 -13.1(3) . . . . ?
O9 As1 C15 C16 108.7(3) . . . . ?
O4 As1 C15 C20 46.8(3) . . . . ?
O7 As1 C15 C20 167.6(3) . . . . ?
O9 As1 C15 C20 -70.6(3) . . . . ?
C20 C15 C16 C17 0.2(6) . . . . ?
As1 C15 C16 C17 -179.1(3) . . . . ?
C15 C16 C17 C18 -1.3(7) . . . . ?
C16 C17 C18 C19 1.4(9) . . . . ?
C17 C18 C19 C20 -0.3(9) . . . . ?
C16 C15 C20 C19 0.8(6) . . . . ?
As1 C15 C20 C19 -179.8(3) . . . . ?
C18 C19 C20 C15 -0.8(7) . . . . ?
N3 C2 N1 C1 -0.1(4) . . . . ?
N3 C2 N1 Cu1 -173.7(2) . . . . ?
N2 C1 N1 C2 0.2(4) . . . . ?
N2 C1 N1 Cu1 173.3(3) . . . . ?
N6 Cu1 N1 C2 102.6(9) 4_455 . . . ?
N6 Cu1 N1 C1 -69.2(10) 4_455 . . . ?
N1 C1 N2 N3 -0.2(4) . . . . ?
N1 C2 N3 N2 -0.1(4) . . . . ?
N1 C2 N3 C3 -177.7(3) . . . . ?
C1 N2 N3 C2 0.1(4) . . . . ?
C1 N2 N3 C3 177.9(3) . . . . ?
C4 C3 N3 C2 109.5(4) . . . . ?
C4 C3 N3 N2 -67.9(4) . . . . ?
N6 C7 N4 N5 -1.4(5) . . . . ?
N6 C7 N4 C5 177.9(4) . . . . ?
C4 C5 N4 C7 132.3(4) . . . . ?
C4 C5 N4 N5 -48.4(5) . . . . ?
N6 C6 N5 N4 0.3(4) . . . . ?
C7 N4 N5 C6 0.7(4) . . . . ?
C5 N4 N5 C6 -178.8(3) . . . . ?
N4 C7 N6 C6 1.5(5) . . . . ?
N4 C7 N6 Cu1 -176.3(3) . . . 4_656 ?
N5 C6 N6 C7 -1.1(5) . . . . ?
N5 C6 N6 Cu1 176.5(3) . . . 4_656 ?
N9 C9 N7 C8 -0.6(4) . . . . ?
N9 C9 N7 Cu2 169.4(3) . . . . ?
N8 C8 N7 C9 0.5(5) . . . . ?
N8 C8 N7 Cu2 -169.2(3) . . . . ?
N7 Cu2 N7 C9 -157(100) 3_755 . . . ?
N7 Cu2 N7 C8 10(100) 3_755 . . . ?
N7 C8 N8 N9 -0.1(5) . . . . ?
N7 C9 N9 N8 0.6(5) . . . . ?
N7 C9 N9 C10 -170.9(3) . . . . ?
C8 N8 N9 C9 -0.3(4) . . . . ?
C8 N8 N9 C10 171.9(3) . . . . ?
C11 C10 N9 C9 79.8(5) . . . . ?
C11 C10 N9 N8 -90.8(4) . . . . ?
N12 C14 N10 N11 0.7(4) . . . . ?
N12 C14 N10 C12 177.9(3) . . . . ?
C11 C12 N10 C14 -62.1(5) . . . . ?
C11 C12 N10 N11 114.8(4) . . . . ?
N12 C13 N11 N10 0.8(4) . . . . ?
C14 N10 N11 C13 -0.9(4) . . . . ?
C12 N10 N11 C13 -178.3(3) . . . . ?
N10 C14 N12 C13 -0.2(4) . . . . ?
N10 C14 N12 Cu3 -175.3(2) . . . . ?
N11 C13 N12 C14 -0.4(4) . . . . ?
N11 C13 N12 Cu3 174.7(3) . . . . ?
N12 Cu3 N12 C14 69(100) 3_645 . . . ?
N12 Cu3 N12 C13 -104(100) 3_645 . . . ?
O6 Mo2 O3 Mo1 177.27(12) . . . . ?
O5 Mo2 O3 Mo1 71.36(13) . . . . ?
O8 Mo2 O3 Mo1 -55.0(2) . . . . ?
O7 Mo2 O3 Mo1 -92.09(11) 3_545 . . . ?
O4 Mo2 O3 Mo1 -16.85(10) . . . . ?
Mo3 Mo2 O3 Mo1 -87.41(11) 3_545 . . . ?
O2 Mo1 O3 Mo2 -177.00(12) . . . . ?
O1 Mo1 O3 Mo2 -71.43(13) . . . . ?
O12 Mo1 O3 Mo2 53.9(2) . . . . ?
O4 Mo1 O3 Mo2 17.15(10) . . . . ?
O9 Mo1 O3 Mo2 93.40(11) 3_545 . . . ?
Mo3 Mo1 O3 Mo2 88.57(11) . . . . ?
O7 As1 O4 Mo1 -5.65(17) . . . . ?
O9 As1 O4 Mo1 -130.77(13) . . . . ?
C15 As1 O4 Mo1 112.12(15) . . . . ?
O7 As1 O4 Mo2 129.92(13) . . . . ?
O9 As1 O4 Mo2 4.79(17) . . . . ?
C15 As1 O4 Mo2 -112.31(16) . . . . ?
O2 Mo1 O4 As1 70.5(4) . . . . ?
O1 Mo1 O4 As1 -122.92(15) . . . . ?
O3 Mo1 O4 As1 136.42(15) . . . . ?
O12 Mo1 O4 As1 -27.32(14) . . . . ?
O9 Mo1 O4 As1 50.28(13) 3_545 . . . ?
Mo2 Mo1 O4 As1 148.75(17) . . . . ?
Mo3 Mo1 O4 As1 3.17(13) . . . . ?
O2 Mo1 O4 Mo2 -78.3(3) . . . . ?
O1 Mo1 O4 Mo2 88.33(9) . . . . ?
O3 Mo1 O4 Mo2 -12.33(7) . . . . ?
O12 Mo1 O4 Mo2 -176.07(8) . . . . ?
O9 Mo1 O4 Mo2 -98.47(7) 3_545 . . . ?
Mo3 Mo1 O4 Mo2 -145.58(5) . . . . ?
O6 Mo2 O4 As1 -73.0(4) . . . . ?
O5 Mo2 O4 As1 126.17(16) . . . . ?
O8 Mo2 O4 As1 27.03(14) . . . . ?
O3 Mo2 O4 As1 -134.65(16) . . . . ?
O7 Mo2 O4 As1 -49.49(14) 3_545 . . . ?
Mo1 Mo2 O4 As1 -147.06(18) . . . . ?
Mo3 Mo2 O4 As1 -3.89(13) 3_545 . . . ?
O6 Mo2 O4 Mo1 74.1(3) . . . . ?
O5 Mo2 O4 Mo1 -86.77(9) . . . . ?
O8 Mo2 O4 Mo1 174.09(8) . . . . ?
O3 Mo2 O4 Mo1 12.42(7) . . . . ?
O7 Mo2 O4 Mo1 97.58(7) 3_545 . . . ?
Mo3 Mo2 O4 Mo1 143.18(5) 3_545 . . . ?
O4 As1 O7 Mo2 -124.99(13) . . . 3_545 ?
O9 As1 O7 Mo2 -1.36(16) . . . 3_545 ?
C15 As1 O7 Mo2 118.45(15) . . . 3_545 ?
O4 As1 O7 Mo3 5.64(17) . . . . ?
O9 As1 O7 Mo3 129.27(13) . . . . ?
C15 As1 O7 Mo3 -110.93(15) . . . . ?
O11 Mo3 O7 As1 -65.2(4) . . . . ?
O10 Mo3 O7 As1 126.87(15) . . . . ?
O12 Mo3 O7 As1 28.09(14) . . . . ?
O8 Mo3 O7 As1 -131.29(15) 3_545 . . . ?
O9 Mo3 O7 As1 -47.57(13) 3_545 . . . ?
Mo2 Mo3 O7 As1 -144.47(17) 3_545 . . . ?
Mo1 Mo3 O7 As1 -3.12(12) . . . . ?
O11 Mo3 O7 Mo2 79.2(3) . . . 3_545 ?
O10 Mo3 O7 Mo2 -88.66(9) . . . 3_545 ?
O12 Mo3 O7 Mo2 172.56(8) . . . 3_545 ?
O8 Mo3 O7 Mo2 13.18(7) 3_545 . . 3_545 ?
O9 Mo3 O7 Mo2 96.91(7) 3_545 . . 3_545 ?
Mo1 Mo3 O7 Mo2 141.35(5) . . . 3_545 ?
O6 Mo2 O8 Mo3 70.27(13) . . . 3_545 ?
O5 Mo2 O8 Mo3 176.89(11) . . . 3_545 ?
O3 Mo2 O8 Mo3 -56.8(2) . . . 3_545 ?
O7 Mo2 O8 Mo3 -18.64(9) 3_545 . . 3_545 ?
O4 Mo2 O8 Mo3 -93.75(11) . . . 3_545 ?
Mo1 Mo2 O8 Mo3 -88.62(11) . . . 3_545 ?
O4 As1 O9 Mo1 126.38(12) . . . 3_545 ?
O7 As1 O9 Mo1 0.92(16) . . . 3_545 ?
C15 As1 O9 Mo1 -118.37(14) . . . 3_545 ?
O4 As1 O9 Mo3 -2.75(16) . . . 3_545 ?
O7 As1 O9 Mo3 -128.21(13) . . . 3_545 ?
C15 As1 O9 Mo3 112.50(15) . . . 3_545 ?
O11 Mo3 O12 Mo1 68.98(13) . . . . ?
O10 Mo3 O12 Mo1 175.76(12) . . . . ?
O8 Mo3 O12 Mo1 -55.2(2) 3_545 . . . ?
O7 Mo3 O12 Mo1 -93.51(11) . . . . ?
O9 Mo3 O12 Mo1 -17.78(10) 3_545 . . . ?
Mo2 Mo3 O12 Mo1 -87.06(12) 3_545 . . . ?
O2 Mo1 O12 Mo3 -69.63(14) . . . . ?
O1 Mo1 O12 Mo3 -174.61(13) . . . . ?
O3 Mo1 O12 Mo3 59.1(2) . . . . ?
O4 Mo1 O12 Mo3 94.90(12) . . . . ?
O9 Mo1 O12 Mo3 18.53(10) 3_545 . . . ?
Mo2 Mo1 O12 Mo3 91.32(12) . . . . ?
 
_diffrn_measured_fraction_theta_max    0.997
_diffrn_reflns_theta_full              26.02
_diffrn_measured_fraction_theta_full   0.997
_refine_diff_density_max    0.499
_refine_diff_density_min   -0.553
_refine_diff_density_rms    0.092

#===================================================
 
data_2
 
_audit_creation_method            SHELXL-97
_chemical_name_systematic
;
 ?
;
_chemical_name_common             ?
_chemical_melting_point           ?
_chemical_formula_moiety          'C22 H29 As Cu2 Mo3 N12 O12'
_chemical_formula_sum
 'C22 H29 As Cu2 Mo3 N12 O12'
_chemical_formula_weight          1143.39
 
loop_
 _atom_type_symbol
 _atom_type_description
 _atom_type_scat_dispersion_real
 _atom_type_scat_dispersion_imag
 _atom_type_scat_source
 'C'  'C'   0.0033   0.0016
 'International Tables Vol C Tables 4.2.6.8 and 6.1.1.4'
 'H'  'H'   0.0000   0.0000
 'International Tables Vol C Tables 4.2.6.8 and 6.1.1.4'
 'N'  'N'   0.0061   0.0033
 'International Tables Vol C Tables 4.2.6.8 and 6.1.1.4'
 'O'  'O'   0.0106   0.0060
 'International Tables Vol C Tables 4.2.6.8 and 6.1.1.4'
 'Cu'  'Cu'   0.3201   1.2651
 'International Tables Vol C Tables 4.2.6.8 and 6.1.1.4'
 'As'  'As'   0.0499   2.0058
 'International Tables Vol C Tables 4.2.6.8 and 6.1.1.4'
 'Mo'  'Mo'  -1.6832   0.6857
 'International Tables Vol C Tables 4.2.6.8 and 6.1.1.4'
 
_symmetry_cell_setting            Triclinic
_symmetry_space_group_name_H-M    P-1
 
loop_
 _symmetry_equiv_pos_as_xyz
 'x, y, z'
 '-x, -y, -z'
 
_cell_length_a                    11.3976(3)
_cell_length_b                    13.3822(4)
_cell_length_c                    13.3964(5)
_cell_angle_alpha                 109.716(3)
_cell_angle_beta                  96.413(2)
_cell_angle_gamma                 107.931(2)
_cell_volume                      1776.28(10)
_cell_formula_units_Z             2
_cell_measurement_temperature     293(2)
_cell_measurement_reflns_used     7279
_cell_measurement_theta_min       2.8582
_cell_measurement_theta_max       29.0856
 
_exptl_crystal_description        block
_exptl_crystal_colour             yellow
_exptl_crystal_size_max           0.35
_exptl_crystal_size_mid           0.28
_exptl_crystal_size_min           0.21
_exptl_crystal_density_meas       ?
_exptl_crystal_density_diffrn     2.138
_exptl_crystal_density_method     'not measured'
_exptl_crystal_F_000              1116
_exptl_absorpt_coefficient_mu     3.206
_exptl_absorpt_correction_type    multi-scan
_exptl_absorpt_correction_T_min   0.3999
_exptl_absorpt_correction_T_max   0.5524
_exptl_absorpt_process_details    'CrysAlis (Oxford Diffraction, 2006)'
 
_exptl_special_details
;
 ?
;
 
_diffrn_ambient_temperature       293(2)
_diffrn_radiation_wavelength      0.71073
_diffrn_radiation_type            MoK\a
_diffrn_radiation_source          'fine-focus sealed tube'
_diffrn_radiation_monochromator   graphite
_diffrn_measurement_device_type  'Oxford Diffraction Gemini R Ultra'
_diffrn_measurement_method        '\w scan'
_diffrn_detector_area_resol_mean  10.0
_diffrn_standards_number          ?
_diffrn_standards_interval_count  ?
_diffrn_standards_interval_time   ?
_diffrn_standards_decay_%         ?
_diffrn_reflns_number             12306
_diffrn_reflns_av_R_equivalents   0.0191
_diffrn_reflns_av_sigmaI/netI     0.0412
_diffrn_reflns_limit_h_min        -12
_diffrn_reflns_limit_h_max        14
_diffrn_reflns_limit_k_min        -15
_diffrn_reflns_limit_k_max        16
_diffrn_reflns_limit_l_min        -16
_diffrn_reflns_limit_l_max        14
_diffrn_reflns_theta_min          2.86
_diffrn_reflns_theta_max          26.02
_reflns_number_total              6943
_reflns_number_gt                 5199
_reflns_threshold_expression      >2sigma(I)
 
_computing_data_collection        'CrysAlis (Oxford Diffraction, 2006)'
_computing_cell_refinement         CrysAlis
_computing_data_reduction          CrysAlis
_computing_structure_solution    'SHELXL-97 (Sheldrick, 1997)'
_computing_structure_refinement   'SHELXL-97 (Sheldrick, 2008)'
_computing_molecular_graphics     ?
_computing_publication_material   ?
 
_refine_special_details
;
 Refinement of F^2^ against ALL reflections.  The weighted R-factor wR and
 goodness of fit S are based on F^2^, conventional R-factors R are based
 on F, with F set to zero for negative F^2^. The threshold expression of
 F^2^ > 2sigma(F^2^) is used only for calculating R-factors(gt) etc. and is
 not relevant to the choice of reflections for refinement.  R-factors based
 on F^2^ are statistically about twice as large as those based on F, and R-
 factors based on ALL data will be even larger.
;
 
_refine_ls_structure_factor_coef  Fsqd
_refine_ls_matrix_type            full
_refine_ls_weighting_scheme       calc
_refine_ls_weighting_details
 'calc w=1/[\s^2^(Fo^2^)+(0.0655P)^2^+0.0000P] where P=(Fo^2^+2Fc^2^)/3'
_atom_sites_solution_primary      direct
_atom_sites_solution_secondary    difmap
_atom_sites_solution_hydrogens    geom
_refine_ls_hydrogen_treatment     constr
_refine_ls_extinction_method      none
_refine_ls_extinction_coef        ?
_refine_ls_number_reflns          6943
_refine_ls_number_parameters      488
_refine_ls_number_restraints      384
_refine_ls_R_factor_all           0.0513
_refine_ls_R_factor_gt            0.0380
_refine_ls_wR_factor_ref          0.1092
_refine_ls_wR_factor_gt           0.1064
_refine_ls_goodness_of_fit_ref    1.052
_refine_ls_restrained_S_all       1.075
_refine_ls_shift/su_max           0.001
_refine_ls_shift/su_mean          0.000
 
loop_
 _atom_site_label
 _atom_site_type_symbol
 _atom_site_fract_x
 _atom_site_fract_y
 _atom_site_fract_z
 _atom_site_U_iso_or_equiv
 _atom_site_adp_type
 _atom_site_occupancy
 _atom_site_symmetry_multiplicity
 _atom_site_calc_flag
 _atom_site_refinement_flags
 _atom_site_disorder_assembly
 _atom_site_disorder_group
Cu1 Cu 0.48103(7) -0.01468(6) -0.13558(7) 0.0566(2) Uani 1 1 d . . .
Cu2 Cu 0.64480(9) 0.50498(7) 0.50041(8) 0.0672(3) Uani 1 1 d . . .
As1 As 0.61847(5) 0.46902(4) -0.05128(4) 0.02489(13) Uani 1 1 d . . .
Mo1 Mo 0.41393(4) 0.26147(3) 0.03926(4) 0.03287(13) Uani 1 1 d . . .
Mo2 Mo 0.61947(5) 0.49783(3) 0.23096(4) 0.03494(13) Uani 1 1 d . . .
Mo3 Mo 0.71236(4) 0.73471(3) 0.19081(4) 0.03431(13) Uani 1 1 d . . .
C1 C 0.7247(6) 0.1709(5) -0.0171(6) 0.0602(14) Uani 1 1 d U . .
H1 H 0.6860 0.2201 0.0180 0.072 Uiso 1 1 calc R . .
C2 C 0.7484(6) 0.0257(6) -0.1212(7) 0.0640(14) Uani 1 1 d U A .
H2 H 0.7338 -0.0464 -0.1730 0.077 Uiso 1 1 calc R . .
C3 C 0.9857(7) 0.0990(6) -0.0738(7) 0.0683(13) Uani 0.368(15) 1 d PDU A 1
H3A H 1.0455 0.1727 -0.0650 0.082 Uiso 0.368(15) 1 calc PR A 1
H3B H 0.9815 0.0423 -0.1437 0.082 Uiso 0.368(15) 1 calc PR A 1
C4 C 1.026(2) 0.0651(4) 0.0224(12) 0.069(2) Uani 0.368(15) 1 d PDU . 1
H4A H 1.1180 0.0949 0.0473 0.083 Uiso 0.368(15) 1 calc PR A 1
H4B H 0.9913 0.0958 0.0833 0.083 Uiso 0.368(15) 1 calc PR A 1
C3' C 0.9857(7) 0.0990(6) -0.0738(7) 0.0683(13) Uani 0.632(15) 1 d PU A 2
H3'1 H 0.9831 0.0615 -0.1504 0.082 Uiso 0.632(15) 1 calc PR A 2
H3'2 H 1.0457 0.1769 -0.0488 0.082 Uiso 0.632(15) 1 calc PR A 2
C4' C 1.0361(12) 0.0435(11) -0.0157(13) 0.070(2) Uani 0.632(15) 1 d PU . 2
H4'1 H 1.0887 0.0117 -0.0586 0.085 Uiso 0.632(15) 1 calc PR A 2
H4'2 H 1.0936 0.1040 0.0512 0.085 Uiso 0.632(15) 1 calc PR A 2
C5 C 0.2220(7) -0.0981(5) -0.2546(7) 0.0711(16) Uani 1 1 d U . .
H5 H 0.2301 -0.0240 -0.2451 0.085 Uiso 1 1 calc R . .
C6 C 0.2629(6) -0.2334(5) -0.2411(6) 0.0556(13) Uani 1 1 d U . .
H6 H 0.3037 -0.2776 -0.2231 0.067 Uiso 1 1 calc R . .
C7 C 0.0547(6) -0.3900(5) -0.3525(6) 0.0623(15) Uani 1 1 d U . .
H7A H -0.0281 -0.3911 -0.3409 0.075 Uiso 1 1 calc R . .
H7B H 0.0789 -0.4375 -0.3198 0.075 Uiso 1 1 calc R . .
C8 C 0.0462(6) -0.4382(5) -0.4718(6) 0.0596(15) Uani 1 1 d U . .
H8A H 0.1298 -0.4341 -0.4832 0.072 Uiso 1 1 calc R . .
H8B H 0.0189 -0.3922 -0.5048 0.072 Uiso 1 1 calc R . .
C9 C 0.5078(8) 0.2608(7) 0.3856(8) 0.0834(18) Uani 1 1 d U . .
H9 H 0.5053 0.2652 0.3176 0.100 Uiso 1 1 calc R . .
C10 C 0.5506(9) 0.3090(7) 0.5561(8) 0.0914(17) Uani 1 1 d U . .
H10 H 0.5807 0.3501 0.6312 0.110 Uiso 1 1 calc R . .
C11 C 0.4384(10) 0.1199(8) 0.5584(9) 0.1014(18) Uani 1 1 d U . .
H11A H 0.3502 0.0725 0.5217 0.122 Uiso 1 1 calc R . .
H11B H 0.4416 0.1632 0.6338 0.122 Uiso 1 1 calc R . .
C12 C 0.5134(10) 0.0433(8) 0.5559(8) 0.110(2) Uani 1 1 d U . .
H12A H 0.6036 0.0893 0.5808 0.131 Uiso 1 1 calc R . .
H12B H 0.4911 0.0053 0.6051 0.131 Uiso 1 1 calc R . .
C13 C 0.8118(9) 0.7295(7) 0.5161(8) 0.0886(18) Uani 1 1 d U A .
H13 H 0.8179 0.7081 0.4437 0.106 Uiso 1 1 calc R . .
C14 C 0.7740(9) 0.7282(8) 0.6659(8) 0.093(2) Uani 1 1 d U . .
H14 H 0.7457 0.7020 0.7182 0.112 Uiso 1 1 calc R . .
C15 C 0.9407(9) 0.9374(8) 0.5940(7) 0.1008(18) Uani 0.368(15) 1 d PDU A 1
H15A H 1.0274 0.9418 0.6120 0.121 Uiso 0.368(15) 1 calc PR A 1
H15B H 0.9312 0.9960 0.6555 0.121 Uiso 0.368(15) 1 calc PR A 1
C16 C 0.9297(6) 0.974(3) 0.4982(18) 0.103(3) Uani 0.368(15) 1 d PDU . 1
H16A H 0.8889 1.0290 0.5097 0.123 Uiso 0.368(15) 1 calc PR A 1
H16B H 0.8842 0.9086 0.4299 0.123 Uiso 0.368(15) 1 calc PR A 1
C15' C 0.9407(9) 0.9374(8) 0.5940(7) 0.1008(18) Uani 0.632(15) 1 d PDU A 2
H15C H 1.0149 0.9688 0.6541 0.121 Uiso 0.632(15) 1 calc PR A 2
H15D H 0.8951 0.9891 0.6103 0.121 Uiso 0.632(15) 1 calc PR A 2
C16' C 0.9851(17) 0.9367(6) 0.4932(10) 0.103(2) Uani 0.632(15) 1 d PDU . 2
H16D H 0.9193 0.8837 0.4278 0.123 Uiso 0.632(15) 1 calc PR A 2
H16C H 1.0605 0.9175 0.4913 0.123 Uiso 0.632(15) 1 calc PR A 2
C17 C 0.7539(6) 0.4377(5) -0.1104(5) 0.0453(11) Uani 1 1 d U . .
C18 C 0.7399(6) 0.3272(5) -0.1709(6) 0.0599(12) Uani 1 1 d U . .
H18 H 0.6644 0.2667 -0.1846 0.072 Uiso 1 1 calc R . .
C19 C 0.8425(7) 0.3087(6) -0.2110(6) 0.0678(14) Uani 1 1 d U . .
H19 H 0.8364 0.2346 -0.2510 0.081 Uiso 1 1 calc R . .
C20 C 0.9513(7) 0.3983(6) -0.1921(6) 0.0650(13) Uani 1 1 d U . .
H20 H 1.0183 0.3848 -0.2206 0.078 Uiso 1 1 calc R . .
C21 C 0.9637(7) 0.5058(6) -0.1332(6) 0.0693(14) Uani 1 1 d U . .
H21 H 1.0397 0.5659 -0.1188 0.083 Uiso 1 1 calc R . .
C22 C 0.8643(6) 0.5266(6) -0.0944(6) 0.0614(13) Uani 1 1 d U . .
H22 H 0.8712 0.6015 -0.0568 0.074 Uiso 1 1 calc R . .
N1 N 0.6595(4) 0.0642(4) -0.0920(4) 0.0474(12) Uani 1 1 d . . .
N2 N 0.8484(5) 0.1988(5) 0.0017(5) 0.0687(17) Uani 1 1 d . A .
N3 N 0.8604(5) 0.1035(4) -0.0670(5) 0.0573(14) Uani 1 1 d . . .
N4 N 0.3146(5) -0.1224(4) -0.2118(4) 0.0507(13) Uani 1 1 d U . .
N5 N 0.1175(6) -0.1874(5) -0.3119(6) 0.088(2) Uani 1 1 d U . .
N6 N 0.1472(5) -0.2728(4) -0.2986(5) 0.0567(14) Uani 1 1 d U . .
N7 N 0.5658(6) 0.3517(4) 0.4801(4) 0.0583(14) Uani 1 1 d . . .
N8 N 0.4540(7) 0.1635(6) 0.3981(6) 0.0829(19) Uani 1 1 d U . .
N9 N 0.4856(7) 0.1986(5) 0.5068(6) 0.0779(18) Uani 1 1 d U . .
N10 N 0.7498(6) 0.6598(5) 0.5592(5) 0.0667(16) Uani 1 1 d . . .
N11 N 0.8633(7) 0.8334(5) 0.5914(7) 0.087(2) Uani 1 1 d . . .
N12 N 0.8409(8) 0.8342(7) 0.6875(7) 0.105(3) Uani 1 1 d . A .
O1 O 0.4345(4) 0.1381(3) -0.0333(3) 0.0482(10) Uani 1 1 d . . .
O2 O 0.3425(4) 0.2316(3) 0.1360(3) 0.0511(10) Uani 1 1 d . . .
O3 O 0.4999(3) 0.3431(2) -0.0796(3) 0.0289(7) Uani 1 1 d . . .
O4 O 0.5841(3) 0.3478(3) 0.1258(3) 0.0369(8) Uani 1 1 d . . .
O5 O 0.4293(3) 0.4515(2) 0.1109(3) 0.0293(7) Uani 1 1 d . . .
O6 O 0.5382(4) 0.4682(3) 0.3244(3) 0.0536(11) Uani 1 1 d . . .
O7 O 0.7721(4) 0.5250(3) 0.2892(3) 0.0576(12) Uani 1 1 d . . .
O8 O 0.6757(3) 0.5462(3) 0.0865(3) 0.0303(7) Uani 1 1 d . . .
O9 O 0.6247(3) 0.6496(3) 0.2670(3) 0.0348(8) Uani 1 1 d . . .
O10 O 0.6917(4) 0.8586(3) 0.2584(3) 0.0516(11) Uani 1 1 d . . .
O11 O 0.8657(4) 0.7611(3) 0.2454(4) 0.0583(12) Uani 1 1 d . . .
O12 O 0.7299(3) 0.7488(3) 0.0564(3) 0.0337(8) Uani 1 1 d . . .
 
loop_
 _atom_site_aniso_label
 _atom_site_aniso_U_11
 _atom_site_aniso_U_22
 _atom_site_aniso_U_33
 _atom_site_aniso_U_23
 _atom_site_aniso_U_13
 _atom_site_aniso_U_12
Cu1 0.0414(4) 0.0462(4) 0.0654(6) 0.0136(4) 0.0043(4) 0.0062(3)
Cu2 0.0821(7) 0.0584(5) 0.0645(6) 0.0233(4) 0.0140(5) 0.0325(5)
As1 0.0280(3) 0.0246(2) 0.0258(3) 0.0097(2) 0.0109(2) 0.0132(2)
Mo1 0.0400(3) 0.0266(2) 0.0351(3) 0.01414(19) 0.0113(2) 0.01337(19)
Mo2 0.0476(3) 0.0311(2) 0.0287(3) 0.01230(19) 0.0048(2) 0.0188(2)
Mo3 0.0413(3) 0.0272(2) 0.0309(3) 0.00885(18) 0.0089(2) 0.01071(19)
C1 0.046(2) 0.057(2) 0.077(3) 0.022(2) 0.021(2) 0.021(2)
C2 0.043(2) 0.059(2) 0.085(3) 0.022(2) 0.020(2) 0.019(2)
C3 0.045(2) 0.068(2) 0.087(3) 0.026(2) 0.019(2) 0.0174(18)
C4 0.042(3) 0.070(3) 0.087(4) 0.023(3) 0.019(3) 0.018(3)
C3' 0.045(2) 0.068(2) 0.087(3) 0.026(2) 0.019(2) 0.0174(18)
C4' 0.044(3) 0.073(3) 0.089(4) 0.029(3) 0.021(3) 0.017(3)
C5 0.059(3) 0.038(2) 0.097(3) 0.023(2) -0.011(3) 0.007(2)
C6 0.045(2) 0.034(2) 0.079(3) 0.016(2) -0.001(2) 0.0145(19)
C7 0.051(3) 0.035(2) 0.084(3) 0.021(2) -0.003(3) 0.004(2)
C8 0.049(3) 0.036(2) 0.081(3) 0.019(2) 0.002(3) 0.007(2)
C9 0.085(2) 0.0830(19) 0.084(2) 0.0338(11) 0.0210(11) 0.0312(11)
C10 0.0930(19) 0.0910(19) 0.0914(19) 0.0364(11) 0.0223(10) 0.0348(11)
C11 0.102(2) 0.1009(19) 0.101(2) 0.0404(11) 0.0260(11) 0.0367(11)
C12 0.111(2) 0.109(2) 0.109(2) 0.0436(12) 0.0259(11) 0.0399(12)
C13 0.087(3) 0.074(3) 0.077(3) 0.023(3) -0.012(3) 0.012(3)
C14 0.085(4) 0.078(3) 0.077(4) 0.010(3) -0.005(3) 0.012(3)
C15 0.093(3) 0.083(3) 0.086(3) 0.019(3) -0.014(3) 0.008(2)
C16 0.094(4) 0.085(4) 0.086(4) 0.018(4) -0.014(4) 0.005(3)
C15' 0.093(3) 0.083(3) 0.086(3) 0.019(3) -0.014(3) 0.008(2)
C16' 0.095(4) 0.084(4) 0.085(4) 0.017(3) -0.016(3) 0.006(3)
C17 0.046(2) 0.051(2) 0.060(2) 0.0255(19) 0.035(2) 0.0342(18)
C18 0.054(2) 0.059(2) 0.073(2) 0.020(2) 0.034(2) 0.0292(18)
C19 0.063(2) 0.065(2) 0.077(3) 0.015(2) 0.035(2) 0.035(2)
C20 0.056(2) 0.070(2) 0.075(3) 0.022(2) 0.035(2) 0.032(2)
C21 0.056(2) 0.072(2) 0.076(3) 0.020(2) 0.032(2) 0.022(2)
C22 0.052(2) 0.062(2) 0.072(3) 0.019(2) 0.034(2) 0.026(2)
N1 0.039(3) 0.033(2) 0.055(3) 0.009(2) 0.004(2) 0.006(2)
N2 0.053(4) 0.054(3) 0.077(4) 0.013(3) 0.001(3) 0.010(3)
N3 0.040(3) 0.047(3) 0.078(4) 0.021(3) 0.014(3) 0.011(2)
N4 0.041(3) 0.036(2) 0.068(3) 0.019(2) 0.003(2) 0.011(2)
N5 0.069(4) 0.043(3) 0.130(5) 0.031(3) -0.032(3) 0.013(3)
N6 0.046(3) 0.030(2) 0.084(4) 0.019(2) -0.005(3) 0.012(2)
N7 0.081(4) 0.061(3) 0.045(3) 0.026(3) 0.019(3) 0.036(3)
N8 0.085(2) 0.081(2) 0.083(2) 0.0333(12) 0.0199(11) 0.0301(12)
N9 0.080(2) 0.077(2) 0.078(2) 0.0329(12) 0.0212(11) 0.0281(11)
N10 0.068(4) 0.066(4) 0.048(3) -0.001(3) -0.002(3) 0.032(3)
N11 0.073(5) 0.051(4) 0.100(6) 0.011(4) -0.019(4) 0.011(3)
N12 0.094(6) 0.100(6) 0.081(6) -0.008(5) 0.017(5) 0.031(5)
O1 0.054(3) 0.0289(18) 0.058(3) 0.0111(18) 0.010(2) 0.0180(18)
O2 0.065(3) 0.051(2) 0.047(2) 0.030(2) 0.023(2) 0.018(2)
O3 0.0300(18) 0.0297(16) 0.0306(19) 0.0127(14) 0.0124(15) 0.0133(14)
O4 0.048(2) 0.0324(17) 0.036(2) 0.0136(15) 0.0061(17) 0.0230(16)
O5 0.0363(19) 0.0284(16) 0.0300(18) 0.0143(14) 0.0097(15) 0.0169(15)
O6 0.088(3) 0.046(2) 0.035(2) 0.0229(18) 0.020(2) 0.025(2)
O7 0.061(3) 0.051(2) 0.050(3) 0.007(2) -0.012(2) 0.028(2)
O8 0.0345(19) 0.0294(16) 0.0287(18) 0.0109(14) 0.0081(15) 0.0145(14)
O9 0.051(2) 0.0329(17) 0.0260(19) 0.0111(15) 0.0151(16) 0.0210(16)
O10 0.079(3) 0.0309(19) 0.043(2) 0.0092(17) 0.026(2) 0.0207(19)
O11 0.046(3) 0.058(3) 0.055(3) 0.015(2) 0.001(2) 0.011(2)
O12 0.0346(19) 0.0313(17) 0.036(2) 0.0146(15) 0.0134(16) 0.0096(15)
 
_geom_special_details
;
 All esds (except the esd in the dihedral angle between two l.s. planes)
 are estimated using the full covariance matrix.  The cell esds are taken
 into account individually in the estimation of esds in distances, angles
 and torsion angles; correlations between esds in cell parameters are only
 used when they are defined by crystal symmetry.  An approximate (isotropic)
 treatment of cell esds is used for estimating esds involving l.s. planes.
;
 
loop_
 _geom_bond_atom_site_label_1
 _geom_bond_atom_site_label_2
 _geom_bond_distance
 _geom_bond_site_symmetry_2
 _geom_bond_publ_flag
Cu1 N1 1.895(5) . ?
Cu1 N4 1.900(5) . ?
Cu1 O1 2.298(4) . ?
Cu2 N10 1.873(6) . ?
Cu2 N7 1.878(5) . ?
Cu2 O6 2.342(4) . ?
As1 O3 1.691(3) . ?
As1 O5 1.703(3) 2_665 ?
As1 O8 1.711(3) . ?
As1 C17 1.906(5) . ?
Mo1 O2 1.700(4) . ?
Mo1 O1 1.712(3) . ?
Mo1 O12 1.903(4) 2_665 ?
Mo1 O4 1.912(4) . ?
Mo1 O5 2.337(3) . ?
Mo1 O3 2.357(3) . ?
Mo2 O7 1.698(4) . ?
Mo2 O6 1.718(4) . ?
Mo2 O9 1.902(3) . ?
Mo2 O4 1.909(3) . ?
Mo2 O5 2.322(3) . ?
Mo2 O8 2.333(3) . ?
Mo3 O11 1.696(4) . ?
Mo3 O10 1.703(3) . ?
Mo3 O12 1.898(4) . ?
Mo3 O9 1.910(3) . ?
Mo3 O8 2.310(3) . ?
Mo3 O3 2.399(3) 2_665 ?
C1 N2 1.313(8) . ?
C1 N1 1.346(8) . ?
C1 H1 0.9300 . ?
C2 N3 1.306(8) . ?
C2 N1 1.310(8) . ?
C2 H2 0.9300 . ?
C3 N3 1.460(8) . ?
C3 C4 1.571(10) . ?
C3 H3A 0.9700 . ?
C3 H3B 0.9700 . ?
C4 C4 1.525(10) 2_755 ?
C4 H4A 0.9700 . ?
C4 H4B 0.9700 . ?
C4' C4' 1.42(2) 2_755 ?
C4' H4'1 0.9700 . ?
C4' H4'2 0.9700 . ?
C5 N5 1.318(8) . ?
C5 N4 1.322(8) . ?
C5 H5 0.9300 . ?
C6 N6 1.296(8) . ?
C6 N4 1.313(7) . ?
C6 H6 0.9300 . ?
C7 N6 1.463(7) . ?
C7 C8 1.487(10) . ?
C7 H7A 0.9700 . ?
C7 H7B 0.9700 . ?
C8 C8 1.524(11) 2_544 ?
C8 H8A 0.9700 . ?
C8 H8B 0.9700 . ?
C9 N8 1.333(10) . ?
C9 N7 1.341(9) . ?
C9 H9 0.9300 . ?
C10 N9 1.314(10) . ?
C10 N7 1.328(10) . ?
C10 H10 0.9300 . ?
C11 N9 1.450(11) . ?
C11 C12 1.518(13) . ?
C11 H11A 0.9700 . ?
C11 H11B 0.9700 . ?
C12 C12 1.480(18) 2_656 ?
C12 H12A 0.9700 . ?
C12 H12B 0.9700 . ?
C13 N11 1.309(10) . ?
C13 N10 1.324(11) . ?
C13 H13 0.9300 . ?
C14 N12 1.299(11) . ?
C14 N10 1.353(10) . ?
C14 H14 0.9300 . ?
C15 N11 1.386(10) . ?
C15 C16 1.522(10) . ?
C15 H15A 0.9700 . ?
C15 H15B 0.9700 . ?
C16 C16 1.527(10) 2_776 ?
C16 H16A 0.9700 . ?
C16 H16B 0.9700 . ?
C16' C16' 1.564(10) 2_776 ?
C16' H16D 0.9700 . ?
C16' H16C 0.9700 . ?
C17 C18 1.373(8) . ?
C17 C22 1.375(8) . ?
C18 C19 1.396(9) . ?
C18 H18 0.9300 . ?
C19 C20 1.360(9) . ?
C19 H19 0.9300 . ?
C20 C21 1.340(9) . ?
C20 H20 0.9300 . ?
C21 C22 1.364(9) . ?
C21 H21 0.9300 . ?
C22 H22 0.9300 . ?
N2 N3 1.354(7) . ?
N5 N6 1.348(7) . ?
N8 N9 1.337(9) . ?
N11 N12 1.337(11) . ?
O3 Mo3 2.399(3) 2_665 ?
O5 As1 1.703(3) 2_665 ?
O12 Mo1 1.903(4) 2_665 ?
 
loop_
 _geom_angle_atom_site_label_1
 _geom_angle_atom_site_label_2
 _geom_angle_atom_site_label_3
 _geom_angle
 _geom_angle_site_symmetry_1
 _geom_angle_site_symmetry_3
 _geom_angle_publ_flag
N1 Cu1 N4 163.6(2) . . ?
N1 Cu1 O1 95.23(17) . . ?
N4 Cu1 O1 100.31(18) . . ?
N10 Cu2 N7 162.9(3) . . ?
N10 Cu2 O6 105.5(2) . . ?
N7 Cu2 O6 91.4(2) . . ?
O3 As1 O5 111.49(16) . 2_665 ?
O3 As1 O8 111.63(16) . . ?
O5 As1 O8 109.77(15) 2_665 . ?
O3 As1 C17 108.3(2) . . ?
O5 As1 C17 107.4(2) 2_665 . ?
O8 As1 C17 108.2(2) . . ?
O2 Mo1 O1 104.04(19) . . ?
O2 Mo1 O12 98.89(19) . 2_665 ?
O1 Mo1 O12 101.31(17) . 2_665 ?
O2 Mo1 O4 99.46(19) . . ?
O1 Mo1 O4 98.30(17) . . ?
O12 Mo1 O4 148.91(14) 2_665 . ?
O2 Mo1 O5 92.55(16) . . ?
O1 Mo1 O5 162.83(16) . . ?
O12 Mo1 O5 80.03(12) 2_665 . ?
O4 Mo1 O5 74.29(12) . . ?
O2 Mo1 O3 165.88(15) . . ?
O1 Mo1 O3 89.84(16) . . ?
O12 Mo1 O3 75.49(13) 2_665 . ?
O4 Mo1 O3 80.71(13) . . ?
O5 Mo1 O3 73.82(11) . . ?
O7 Mo2 O6 103.4(2) . . ?
O7 Mo2 O9 100.14(17) . . ?
O6 Mo2 O9 97.41(16) . . ?
O7 Mo2 O4 97.07(17) . . ?
O6 Mo2 O4 101.37(17) . . ?
O9 Mo2 O4 150.78(15) . . ?
O7 Mo2 O5 165.36(18) . . ?
O6 Mo2 O5 90.25(18) . . ?
O9 Mo2 O5 83.08(13) . . ?
O4 Mo2 O5 74.70(13) . . ?
O7 Mo2 O8 92.74(19) . . ?
O6 Mo2 O8 163.03(18) . . ?
O9 Mo2 O8 74.24(12) . . ?
O4 Mo2 O8 81.54(13) . . ?
O5 Mo2 O8 74.27(12) . . ?
O11 Mo3 O10 104.1(2) . . ?
O11 Mo3 O12 99.31(19) . . ?
O10 Mo3 O12 100.17(17) . . ?
O11 Mo3 O9 101.36(19) . . ?
O10 Mo3 O9 97.05(16) . . ?
O12 Mo3 O9 148.88(14) . . ?
O11 Mo3 O8 92.10(17) . . ?
O10 Mo3 O8 163.07(17) . . ?
O12 Mo3 O8 81.59(13) . . ?
O9 Mo3 O8 74.67(12) . . ?
O11 Mo3 O3 165.62(16) . 2_665 ?
O10 Mo3 O3 89.86(17) . 2_665 ?
O12 Mo3 O3 74.52(13) . 2_665 ?
O9 Mo3 O3 79.82(14) . 2_665 ?
O8 Mo3 O3 74.28(11) . 2_665 ?
N2 C1 N1 113.4(6) . . ?
N2 C1 H1 123.3 . . ?
N1 C1 H1 123.3 . . ?
N3 C2 N1 110.1(6) . . ?
N3 C2 H2 125.0 . . ?
N1 C2 H2 125.0 . . ?
N3 C3 C4 104.8(11) . . ?
N3 C3 H3A 110.8 . . ?
C4 C3 H3A 110.8 . . ?
N3 C3 H3B 110.8 . . ?
C4 C3 H3B 110.8 . . ?
H3A C3 H3B 108.9 . . ?
C4 C4 C3 106.7(12) 2_755 . ?
C4 C4 H4A 110.4 2_755 . ?
C3 C4 H4A 110.4 . . ?
C4 C4 H4B 110.4 2_755 . ?
C3 C4 H4B 110.4 . . ?
H4A C4 H4B 108.6 . . ?
C4' C4' H4'1 105.8 2_755 . ?
C4' C4' H4'2 105.8 2_755 . ?
H4'1 C4' H4'2 106.2 . . ?
N5 C5 N4 114.6(6) . . ?
N5 C5 H5 122.7 . . ?
N4 C5 H5 122.7 . . ?
N6 C6 N4 110.6(5) . . ?
N6 C6 H6 124.7 . . ?
N4 C6 H6 124.7 . . ?
N6 C7 C8 112.0(6) . . ?
N6 C7 H7A 109.2 . . ?
C8 C7 H7A 109.2 . . ?
N6 C7 H7B 109.2 . . ?
C8 C7 H7B 109.2 . . ?
H7A C7 H7B 107.9 . . ?
C7 C8 C8 112.5(7) . 2_544 ?
C7 C8 H8A 109.1 . . ?
C8 C8 H8A 109.1 2_544 . ?
C7 C8 H8B 109.1 . . ?
C8 C8 H8B 109.1 2_544 . ?
H8A C8 H8B 107.8 . . ?
N8 C9 N7 113.8(8) . . ?
N8 C9 H9 123.1 . . ?
N7 C9 H9 123.1 . . ?
N9 C10 N7 108.1(8) . . ?
N9 C10 H10 126.0 . . ?
N7 C10 H10 126.0 . . ?
N9 C11 C12 113.1(8) . . ?
N9 C11 H11A 109.0 . . ?
C12 C11 H11A 109.0 . . ?
N9 C11 H11B 109.0 . . ?
C12 C11 H11B 109.0 . . ?
H11A C11 H11B 107.8 . . ?
C12 C12 C11 110.7(12) 2_656 . ?
C12 C12 H12A 109.5 2_656 . ?
C11 C12 H12A 109.5 . . ?
C12 C12 H12B 109.5 2_656 . ?
C11 C12 H12B 109.5 . . ?
H12A C12 H12B 108.1 . . ?
N11 C13 N10 109.2(9) . . ?
N11 C13 H13 125.4 . . ?
N10 C13 H13 125.4 . . ?
N12 C14 N10 112.9(9) . . ?
N12 C14 H14 123.6 . . ?
N10 C14 H14 123.6 . . ?
N11 C15 C16 123.5(11) . . ?
N11 C15 H15A 106.5 . . ?
C16 C15 H15A 106.5 . . ?
N11 C15 H15B 106.5 . . ?
C16 C15 H15B 106.5 . . ?
H15A C15 H15B 106.5 . . ?
C15 C16 C16 99.8(12) . 2_776 ?
C15 C16 H16A 111.8 . . ?
C16 C16 H16A 111.8 2_776 . ?
C15 C16 H16B 111.8 . . ?
C16 C16 H16B 111.8 2_776 . ?
H16A C16 H16B 109.5 . . ?
C16' C16' H16D 111.5 2_776 . ?
C16' C16' H16C 111.5 2_776 . ?
H16D C16' H16C 109.3 . . ?
C18 C17 C22 120.4(5) . . ?
C18 C17 As1 120.1(4) . . ?
C22 C17 As1 119.5(4) . . ?
C17 C18 C19 117.8(6) . . ?
C17 C18 H18 121.1 . . ?
C19 C18 H18 121.1 . . ?
C20 C19 C18 120.4(6) . . ?
C20 C19 H19 119.8 . . ?
C18 C19 H19 119.8 . . ?
C21 C20 C19 121.2(6) . . ?
C21 C20 H20 119.4 . . ?
C19 C20 H20 119.4 . . ?
C20 C21 C22 119.7(7) . . ?
C20 C21 H21 120.1 . . ?
C22 C21 H21 120.1 . . ?
C21 C22 C17 120.4(6) . . ?
C21 C22 H22 119.8 . . ?
C17 C22 H22 119.8 . . ?
C2 N1 C1 103.8(5) . . ?
C2 N1 Cu1 128.5(4) . . ?
C1 N1 Cu1 127.5(4) . . ?
C1 N2 N3 102.6(5) . . ?
C2 N3 N2 110.1(5) . . ?
C2 N3 C3 129.1(6) . . ?
N2 N3 C3 120.7(5) . . ?
C6 N4 C5 102.9(5) . . ?
C6 N4 Cu1 132.2(4) . . ?
C5 N4 Cu1 124.7(4) . . ?
C5 N5 N6 101.6(6) . . ?
C6 N6 N5 110.1(5) . . ?
C6 N6 C7 130.6(5) . . ?
N5 N6 C7 119.2(5) . . ?
C10 N7 C9 104.2(7) . . ?
C10 N7 Cu2 127.9(6) . . ?
C9 N7 Cu2 127.9(5) . . ?
C9 N8 N9 101.4(7) . . ?
C10 N9 N8 112.6(7) . . ?
C10 N9 C11 126.8(8) . . ?
N8 N9 C11 120.4(7) . . ?
C13 N10 C14 103.6(7) . . ?
C13 N10 Cu2 133.3(6) . . ?
C14 N10 Cu2 123.0(6) . . ?
C13 N11 N12 110.4(8) . . ?
C13 N11 C15 134.3(10) . . ?
N12 N11 C15 115.2(7) . . ?
C14 N12 N11 103.9(7) . . ?
Mo1 O1 Cu1 173.5(2) . . ?
As1 O3 Mo1 130.01(17) . . ?
As1 O3 Mo3 129.73(17) . 2_665 ?
Mo1 O3 Mo3 87.09(10) . 2_665 ?
Mo2 O4 Mo1 117.77(18) . . ?
As1 O5 Mo2 129.80(16) 2_665 . ?
As1 O5 Mo1 131.31(18) 2_665 . ?
Mo2 O5 Mo1 89.21(11) . . ?
Mo2 O6 Cu2 121.5(2) . . ?
As1 O8 Mo3 130.60(18) . . ?
As1 O8 Mo2 129.48(16) . . ?
Mo3 O8 Mo2 89.43(11) . . ?
Mo2 O9 Mo3 117.95(17) . . ?
Mo3 O12 Mo1 119.05(17) . 2_665 ?
 
loop_
 _geom_torsion_atom_site_label_1
 _geom_torsion_atom_site_label_2
 _geom_torsion_atom_site_label_3
 _geom_torsion_atom_site_label_4
 _geom_torsion
 _geom_torsion_site_symmetry_1
 _geom_torsion_site_symmetry_2
 _geom_torsion_site_symmetry_3
 _geom_torsion_site_symmetry_4
 _geom_torsion_publ_flag
N3 C3 C4 C4 88(2) . . . 2_755 ?
N6 C7 C8 C8 177.8(7) . . . 2_544 ?
N9 C11 C12 C12 -72.1(14) . . . 2_656 ?
N11 C15 C16 C16 -137(2) . . . 2_776 ?
O3 As1 C17 C18 4.2(6) . . . . ?
O5 As1 C17 C18 -116.3(6) 2_665 . . . ?
O8 As1 C17 C18 125.3(6) . . . . ?
O3 As1 C17 C22 -177.4(5) . . . . ?
O5 As1 C17 C22 62.1(6) 2_665 . . . ?
O8 As1 C17 C22 -56.3(6) . . . . ?
C22 C17 C18 C19 2.5(11) . . . . ?
As1 C17 C18 C19 -179.1(6) . . . . ?
C17 C18 C19 C20 -1.4(12) . . . . ?
C18 C19 C20 C21 1.2(13) . . . . ?
C19 C20 C21 C22 -2.2(13) . . . . ?
C20 C21 C22 C17 3.4(13) . . . . ?
C18 C17 C22 C21 -3.6(12) . . . . ?
As1 C17 C22 C21 178.0(6) . . . . ?
N3 C2 N1 C1 0.5(8) . . . . ?
N3 C2 N1 Cu1 -175.1(5) . . . . ?
N2 C1 N1 C2 -0.7(8) . . . . ?
N2 C1 N1 Cu1 174.9(5) . . . . ?
N4 Cu1 N1 C2 -18.3(12) . . . . ?
O1 Cu1 N1 C2 179.9(6) . . . . ?
N4 Cu1 N1 C1 167.2(7) . . . . ?
O1 Cu1 N1 C1 5.4(6) . . . . ?
N1 C1 N2 N3 0.7(8) . . . . ?
N1 C2 N3 N2 -0.1(9) . . . . ?
N1 C2 N3 C3 -179.0(7) . . . . ?
C1 N2 N3 C2 -0.3(8) . . . . ?
C1 N2 N3 C3 178.7(7) . . . . ?
C4 C3 N3 C2 -97.1(8) . . . . ?
C4 C3 N3 N2 84.1(7) . . . . ?
N6 C6 N4 C5 0.6(8) . . . . ?
N6 C6 N4 Cu1 -175.9(5) . . . . ?
N5 C5 N4 C6 -2.3(10) . . . . ?
N5 C5 N4 Cu1 174.5(6) . . . . ?
N1 Cu1 N4 C6 55.8(12) . . . . ?
O1 Cu1 N4 C6 -142.6(6) . . . . ?
N1 Cu1 N4 C5 -120.0(8) . . . . ?
O1 Cu1 N4 C5 41.6(6) . . . . ?
N4 C5 N5 N6 2.9(10) . . . . ?
N4 C6 N6 N5 1.2(9) . . . . ?
N4 C6 N6 C7 177.1(7) . . . . ?
C5 N5 N6 C6 -2.4(9) . . . . ?
C5 N5 N6 C7 -178.8(7) . . . . ?
C8 C7 N6 C6 -100.9(9) . . . . ?
C8 C7 N6 N5 74.6(9) . . . . ?
N9 C10 N7 C9 -0.5(9) . . . . ?
N9 C10 N7 Cu2 177.3(5) . . . . ?
N8 C9 N7 C10 1.6(10) . . . . ?
N8 C9 N7 Cu2 -176.2(5) . . . . ?
N10 Cu2 N7 C10 27.1(13) . . . . ?
O6 Cu2 N7 C10 -159.2(7) . . . . ?
N10 Cu2 N7 C9 -155.6(8) . . . . ?
O6 Cu2 N7 C9 18.1(7) . . . . ?
N7 C9 N8 N9 -1.9(9) . . . . ?
N7 C10 N9 N8 -0.7(10) . . . . ?
N7 C10 N9 C11 -174.5(8) . . . . ?
C9 N8 N9 C10 1.5(9) . . . . ?
C9 N8 N9 C11 175.9(8) . . . . ?
C12 C11 N9 C10 -106.0(11) . . . . ?
C12 C11 N9 N8 80.6(11) . . . . ?
N11 C13 N10 C14 -3.2(10) . . . . ?
N11 C13 N10 Cu2 174.4(5) . . . . ?
N12 C14 N10 C13 3.0(10) . . . . ?
N12 C14 N10 Cu2 -174.9(6) . . . . ?
N7 Cu2 N10 C13 140.5(9) . . . . ?
O6 Cu2 N10 C13 -33.0(8) . . . . ?
N7 Cu2 N10 C14 -42.3(12) . . . . ?
O6 Cu2 N10 C14 144.2(6) . . . . ?
N10 C13 N11 N12 2.5(11) . . . . ?
N10 C13 N11 C15 177.2(9) . . . . ?
C16 C15 N11 C13 36.0(19) . . . . ?
C16 C15 N11 N12 -149.4(14) . . . . ?
N10 C14 N12 N11 -1.6(11) . . . . ?
C13 N11 N12 C14 -0.6(10) . . . . ?
C15 N11 N12 C14 -176.4(8) . . . . ?
O2 Mo1 O1 Cu1 -154(2) . . . . ?
O12 Mo1 O1 Cu1 103(2) 2_665 . . . ?
O4 Mo1 O1 Cu1 -52(2) . . . . ?
O5 Mo1 O1 Cu1 11(3) . . . . ?
O3 Mo1 O1 Cu1 28(2) . . . . ?
N1 Cu1 O1 Mo1 37(2) . . . . ?
N4 Cu1 O1 Mo1 -138(2) . . . . ?
O5 As1 O3 Mo1 -125.8(2) 2_665 . . . ?
O8 As1 O3 Mo1 -2.7(3) . . . . ?
C17 As1 O3 Mo1 116.3(3) . . . . ?
O5 As1 O3 Mo3 1.8(3) 2_665 . . 2_665 ?
O8 As1 O3 Mo3 125.0(2) . . . 2_665 ?
C17 As1 O3 Mo3 -116.0(3) . . . 2_665 ?
O2 Mo1 O3 As1 62.0(8) . . . . ?
O1 Mo1 O3 As1 -128.3(2) . . . . ?
O12 Mo1 O3 As1 130.0(2) 2_665 . . . ?
O4 Mo1 O3 As1 -29.8(2) . . . . ?
O5 Mo1 O3 As1 46.4(2) . . . . ?
O2 Mo1 O3 Mo3 -80.4(7) . . . 2_665 ?
O1 Mo1 O3 Mo3 89.28(15) . . . 2_665 ?
O12 Mo1 O3 Mo3 -12.45(11) 2_665 . . 2_665 ?
O4 Mo1 O3 Mo3 -172.29(12) . . . 2_665 ?
O5 Mo1 O3 Mo3 -96.07(11) . . . 2_665 ?
O7 Mo2 O4 Mo1 174.2(2) . . . . ?
O6 Mo2 O4 Mo1 69.0(2) . . . . ?
O9 Mo2 O4 Mo1 -60.0(4) . . . . ?
O5 Mo2 O4 Mo1 -18.14(17) . . . . ?
O8 Mo2 O4 Mo1 -94.0(2) . . . . ?
O2 Mo1 O4 Mo2 -71.9(2) . . . . ?
O1 Mo1 O4 Mo2 -177.8(2) . . . . ?
O12 Mo1 O4 Mo2 53.5(4) 2_665 . . . ?
O5 Mo1 O4 Mo2 18.06(17) . . . . ?
O3 Mo1 O4 Mo2 93.74(19) . . . . ?
O7 Mo2 O5 As1 -77.8(6) . . . 2_665 ?
O6 Mo2 O5 As1 123.3(2) . . . 2_665 ?
O9 Mo2 O5 As1 25.9(2) . . . 2_665 ?
O4 Mo2 O5 As1 -134.9(3) . . . 2_665 ?
O8 Mo2 O5 As1 -49.6(2) . . . 2_665 ?
O7 Mo2 O5 Mo1 70.2(6) . . . . ?
O6 Mo2 O5 Mo1 -88.69(15) . . . . ?
O9 Mo2 O5 Mo1 173.88(13) . . . . ?
O4 Mo2 O5 Mo1 13.03(13) . . . . ?
O8 Mo2 O5 Mo1 98.36(12) . . . . ?
O2 Mo1 O5 As1 -126.8(3) . . . 2_665 ?
O1 Mo1 O5 As1 67.9(6) . . . 2_665 ?
O12 Mo1 O5 As1 -28.2(2) 2_665 . . 2_665 ?
O4 Mo1 O5 As1 134.1(3) . . . 2_665 ?
O3 Mo1 O5 As1 49.5(2) . . . 2_665 ?
O2 Mo1 O5 Mo2 86.07(17) . . . . ?
O1 Mo1 O5 Mo2 -79.3(6) . . . . ?
O12 Mo1 O5 Mo2 -175.35(14) 2_665 . . . ?
O4 Mo1 O5 Mo2 -13.04(13) . . . . ?
O3 Mo1 O5 Mo2 -97.70(12) . . . . ?
O7 Mo2 O6 Cu2 11.8(3) . . . . ?
O9 Mo2 O6 Cu2 -90.6(2) . . . . ?
O4 Mo2 O6 Cu2 111.9(2) . . . . ?
O5 Mo2 O6 Cu2 -173.6(2) . . . . ?
O8 Mo2 O6 Cu2 -149.7(4) . . . . ?
N10 Cu2 O6 Mo2 55.1(3) . . . . ?
N7 Cu2 O6 Mo2 -123.0(3) . . . . ?
O3 As1 O8 Mo3 -130.7(2) . . . . ?
O5 As1 O8 Mo3 -6.5(3) 2_665 . . . ?
C17 As1 O8 Mo3 110.3(3) . . . . ?
O3 As1 O8 Mo2 2.9(3) . . . . ?
O5 As1 O8 Mo2 127.1(2) 2_665 . . . ?
C17 As1 O8 Mo2 -116.1(3) . . . . ?
O11 Mo3 O8 As1 -125.3(3) . . . . ?
O10 Mo3 O8 As1 71.1(6) . . . . ?
O12 Mo3 O8 As1 -26.2(2) . . . . ?
O9 Mo3 O8 As1 133.5(3) . . . . ?
O3 Mo3 O8 As1 50.0(2) 2_665 . . . ?
O11 Mo3 O8 Mo2 88.74(18) . . . . ?
O10 Mo3 O8 Mo2 -74.9(6) . . . . ?
O12 Mo3 O8 Mo2 -172.15(14) . . . . ?
O9 Mo3 O8 Mo2 -12.46(13) . . . . ?
O3 Mo3 O8 Mo2 -95.96(12) 2_665 . . . ?
O7 Mo2 O8 As1 126.2(2) . . . . ?
O6 Mo2 O8 As1 -71.9(6) . . . . ?
O9 Mo2 O8 As1 -134.1(3) . . . . ?
O4 Mo2 O8 As1 29.4(2) . . . . ?
O5 Mo2 O8 As1 -47.0(2) . . . . ?
O7 Mo2 O8 Mo3 -87.22(15) . . . . ?
O6 Mo2 O8 Mo3 74.8(5) . . . . ?
O9 Mo2 O8 Mo3 12.54(13) . . . . ?
O4 Mo2 O8 Mo3 176.04(14) . . . . ?
O5 Mo2 O8 Mo3 99.65(12) . . . . ?
O7 Mo2 O9 Mo3 72.7(3) . . . . ?
O6 Mo2 O9 Mo3 177.8(2) . . . . ?
O4 Mo2 O9 Mo3 -52.4(4) . . . . ?
O5 Mo2 O9 Mo3 -92.8(2) . . . . ?
O8 Mo2 O9 Mo3 -17.30(18) . . . . ?
O11 Mo3 O9 Mo2 -71.6(2) . . . . ?
O10 Mo3 O9 Mo2 -177.6(2) . . . . ?
O12 Mo3 O9 Mo2 59.1(4) . . . . ?
O8 Mo3 O9 Mo2 17.44(18) . . . . ?
O3 Mo3 O9 Mo2 93.8(2) 2_665 . . . ?
O11 Mo3 O12 Mo1 -175.43(19) . . . 2_665 ?
O10 Mo3 O12 Mo1 -69.1(2) . . . 2_665 ?
O9 Mo3 O12 Mo1 53.4(4) . . . 2_665 ?
O8 Mo3 O12 Mo1 93.81(18) . . . 2_665 ?
O3 Mo3 O12 Mo1 17.89(15) 2_665 . . 2_665 ?
 
_diffrn_measured_fraction_theta_max    0.992
_diffrn_reflns_theta_full              26.02
_diffrn_measured_fraction_theta_full   0.992
_refine_diff_density_max    1.115
_refine_diff_density_min   -0.952
_refine_diff_density_rms    0.117

#===================================================
 
 
data_3
 
_audit_creation_method            SHELXL-97
_chemical_name_systematic
;
 ?
;
_chemical_name_common             ?
_chemical_melting_point           ?
_chemical_formula_moiety           'C24 H33 As Cu2 Mo3 N12 O12'
_chemical_formula_sum
 'C24 H33 As Cu2 Mo3 N12 O12'
_chemical_formula_weight          1171.44
 
loop_
 _atom_type_symbol
 _atom_type_description
 _atom_type_scat_dispersion_real
 _atom_type_scat_dispersion_imag
 _atom_type_scat_source
 'C'  'C'   0.0033   0.0016
 'International Tables Vol C Tables 4.2.6.8 and 6.1.1.4'
 'H'  'H'   0.0000   0.0000
 'International Tables Vol C Tables 4.2.6.8 and 6.1.1.4'
 'N'  'N'   0.0061   0.0033
 'International Tables Vol C Tables 4.2.6.8 and 6.1.1.4'
 'O'  'O'   0.0106   0.0060
 'International Tables Vol C Tables 4.2.6.8 and 6.1.1.4'
 'Cu'  'Cu'   0.3201   1.2651
 'International Tables Vol C Tables 4.2.6.8 and 6.1.1.4'
 'As'  'As'   0.0499   2.0058
 'International Tables Vol C Tables 4.2.6.8 and 6.1.1.4'
 'Mo'  'Mo'  -1.6832   0.6857
 'International Tables Vol C Tables 4.2.6.8 and 6.1.1.4'
 
_symmetry_cell_setting            Triclinic
_symmetry_space_group_name_H-M    P-1
  
loop_
 _symmetry_equiv_pos_as_xyz
 'x, y, z'
 '-x, -y, -z'
 
_cell_length_a                    11.4894(3)
_cell_length_b                    13.0862(3)
_cell_length_c                    13.1470(3)
_cell_angle_alpha                 82.996(2)
_cell_angle_beta                  82.647(2)
_cell_angle_gamma                 85.451(2)
_cell_volume                      1941.72(8)
_cell_formula_units_Z             2
_cell_measurement_temperature     293(2)
_cell_measurement_reflns_used     6608
_cell_measurement_theta_min       3.1371
_cell_measurement_theta_max       29.1224
  
_exptl_crystal_description        block
_exptl_crystal_colour             brown
_exptl_crystal_size_max           0.32
_exptl_crystal_size_mid           0.24
_exptl_crystal_size_min           0.18
_exptl_crystal_density_meas       ?
_exptl_crystal_density_diffrn     2.004
_exptl_crystal_density_method     'not measured'
_exptl_crystal_F_000              1148
_exptl_absorpt_coefficient_mu     2.936
_exptl_absorpt_correction_type    multi-scan
_exptl_absorpt_correction_T_min   0.4535
_exptl_absorpt_correction_T_max   0.6201
_exptl_absorpt_process_details     'CrysAlis (Oxford Diffraction, 2006)'
  
_exptl_special_details
;
 ?
;
 
_diffrn_ambient_temperature       293(2)
_diffrn_radiation_wavelength      0.71073
_diffrn_radiation_type            MoK\a
_diffrn_radiation_source          'fine-focus sealed tube'
_diffrn_radiation_monochromator   graphite
_diffrn_measurement_device_type   'Oxford Diffraction Gemini R Ultra'
_diffrn_measurement_method         '\w scan'
_diffrn_detector_area_resol_mean  10.0
_diffrn_standards_number          ?
_diffrn_standards_interval_count  ?
_diffrn_standards_interval_time   ?
_diffrn_standards_decay_%         ?
_diffrn_reflns_number             13449
_diffrn_reflns_av_R_equivalents   0.0278
_diffrn_reflns_av_sigmaI/netI     0.0662
_diffrn_reflns_limit_h_min        -10
_diffrn_reflns_limit_h_max        14
_diffrn_reflns_limit_k_min        -16
_diffrn_reflns_limit_k_max        16
_diffrn_reflns_limit_l_min        -15
_diffrn_reflns_limit_l_max        16
_diffrn_reflns_theta_min          3.14
_diffrn_reflns_theta_max          26.02
_reflns_number_total              7617
_reflns_number_gt                 5025
_reflns_threshold_expression      >2\s(I)
 
_computing_data_collection          'CrysAlis (Oxford Diffraction, 2006)'
_computing_cell_refinement          CrysAlis
_computing_data_reduction           CrysAlis
_computing_structure_solution     'SHELXL-97 (Sheldrick, 1997)'
_computing_structure_refinement   'SHELXL-97 (Sheldrick, 2008)'
_computing_molecular_graphics     ?
_computing_publication_material   ?
 
_refine_special_details
;
 Refinement of F^2^ against ALL reflections.  The weighted R-factor wR and
 goodness of fit S are based on F^2^, conventional R-factors R are based
 on F, with F set to zero for negative F^2^. The threshold expression of
 F^2^ > 2\s(F^2^) is used only for calculating R-factors(gt) etc. and is
 not relevant to the choice of reflections for refinement.  R-factors based
 on F^2^ are statistically about twice as large as those based on F, and R-
 factors based on ALL data will be even larger.
;
 
_refine_ls_structure_factor_coef  Fsqd
_refine_ls_matrix_type            full
_refine_ls_weighting_scheme       calc
_refine_ls_weighting_details
 'calc w=1/[\s^2^(Fo^2^)+(0.0653P)^2^+0.0000P] where P=(Fo^2^+2Fc^2^)/3'
_atom_sites_solution_primary      direct
_atom_sites_solution_secondary    difmap
_atom_sites_solution_hydrogens    geom
_refine_ls_hydrogen_treatment    constr
_refine_ls_extinction_method      none
_refine_ls_extinction_coef        ?
_refine_ls_number_reflns          7617
_refine_ls_number_parameters      525
_refine_ls_number_restraints      474
_refine_ls_R_factor_all           0.0754
_refine_ls_R_factor_gt            0.0425
_refine_ls_wR_factor_ref          0.1116
_refine_ls_wR_factor_gt           0.1032
_refine_ls_goodness_of_fit_ref    0.943
_refine_ls_restrained_S_all       0.969
_refine_ls_shift/su_max           0.001
_refine_ls_shift/su_mean          0.000
 
loop_
 _atom_site_label
 _atom_site_type_symbol
 _atom_site_fract_x
 _atom_site_fract_y
 _atom_site_fract_z
 _atom_site_U_iso_or_equiv
 _atom_site_adp_type
 _atom_site_occupancy
 _atom_site_symmetry_multiplicity
 _atom_site_calc_flag
 _atom_site_refinement_flags
 _atom_site_disorder_assembly
 _atom_site_disorder_group
Cu1 Cu 0.58197(10) 0.49544(8) 0.58493(7) 0.0621(3) Uani 1 1 d . . .
Cu2 Cu 1.45408(11) 0.87986(9) -0.02364(10) 0.0900(4) Uani 1 1 d . . .
As1 As 0.38107(5) 0.07186(4) 0.46453(4) 0.02432(15) Uani 1 1 d . . .
Mo1 Mo 0.62418(5) 0.20730(4) 0.53959(4) 0.03018(14) Uani 1 1 d . . .
Mo2 Mo 0.44878(5) 0.08662(4) 0.72459(4) 0.03037(14) Uani 1 1 d . . .
Mo3 Mo 0.32957(5) -0.12268(4) 0.68737(4) 0.03088(15) Uani 1 1 d . . .
C1 C 0.7944(9) 0.4639(7) 0.4456(7) 0.0826(19) Uani 1 1 d U B .
H1 H 0.8100 0.3984 0.4790 0.099 Uiso 1 1 calc R . .
C2 C 0.7170(8) 0.6112(7) 0.4102(6) 0.0674(15) Uani 1 1 d U . .
H2 H 0.6677 0.6711 0.4103 0.081 Uiso 1 1 calc R . .
C3 C 0.8738(8) 0.6762(7) 0.2753(6) 0.0725(14) Uani 1 1 d U . .
H3A H 0.8242 0.7389 0.2628 0.087 Uiso 1 1 calc R A 1
H3B H 0.8988 0.6483 0.2104 0.087 Uiso 1 1 calc R A 1
C4 C 0.981(3) 0.696(3) 0.330(2) 0.0725(17) Uani 0.278(9) 1 d PU B 1
H4A H 0.9529 0.7116 0.3995 0.087 Uiso 0.278(9) 1 calc PR B 1
H4B H 1.0318 0.6334 0.3356 0.087 Uiso 0.278(9) 1 calc PR B 1
C5 C 1.055(3) 0.783(2) 0.278(2) 0.0733(16) Uani 0.278(9) 1 d PU B 1
H5A H 1.0652 0.7731 0.2050 0.088 Uiso 0.278(9) 1 calc PR B 1
H5B H 1.1320 0.7666 0.3009 0.088 Uiso 0.278(9) 1 calc PR B 1
C4' C 0.9207(13) 0.7602(10) 0.3184(9) 0.0722(16) Uani 0.722(9) 1 d PU B 2
H4'1 H 0.9802 0.7304 0.3614 0.087 Uiso 0.722(9) 1 calc PR B 2
H4'2 H 0.8576 0.7915 0.3631 0.087 Uiso 0.722(9) 1 calc PR B 2
C5' C 0.9751(12) 0.8462(10) 0.2414(9) 0.0728(15) Uani 0.722(9) 1 d PU B 2
H5'1 H 1.0328 0.8143 0.1924 0.087 Uiso 0.722(9) 1 calc PR B 2
H5'2 H 0.9135 0.8805 0.2030 0.087 Uiso 0.722(9) 1 calc PR B 2
C6 C 1.0280(9) 0.9197(7) 0.2809(7) 0.0773(14) Uani 1 1 d U . .
H6A H 0.9429 0.9300 0.2880 0.093 Uiso 1 1 calc R B 1
H6B H 1.0506 0.9314 0.3469 0.093 Uiso 1 1 calc R B 1
C7 C 1.0670(9) 1.0079(7) 0.2122(7) 0.0797(15) Uani 1 1 d U B .
H7A H 1.1016 1.0540 0.2507 0.096 Uiso 1 1 calc R . .
H7B H 0.9999 1.0451 0.1837 0.096 Uiso 1 1 calc R . .
C8 C 1.2580(8) 0.9340(7) 0.1282(6) 0.0690(15) Uani 1 1 d U B .
H8 H 1.2964 0.9126 0.1860 0.083 Uiso 1 1 calc R . .
C9 C 1.2181(9) 0.9661(7) -0.0225(7) 0.0749(18) Uani 1 1 d U B .
H9 H 1.2249 0.9689 -0.0941 0.090 Uiso 1 1 calc R . .
C10 C 0.4617(9) 0.4180(7) 0.7841(7) 0.0780(19) Uani 1 1 d U . .
H10 H 0.4891 0.3508 0.7739 0.094 Uiso 1 1 calc R . .
C11 C 0.4370(8) 0.5754(7) 0.7598(7) 0.0741(17) Uani 1 1 d U . .
H11 H 0.4382 0.6442 0.7318 0.089 Uiso 1 1 calc R . .
C12 C 0.3054(8) 0.6004(7) 0.9239(7) 0.0789(16) Uani 1 1 d U . .
H12A H 0.3377 0.6658 0.9280 0.095 Uiso 1 1 calc R . .
H12B H 0.3004 0.5615 0.9918 0.095 Uiso 1 1 calc R . .
C13 C 0.1839(9) 0.6189(8) 0.8888(7) 0.0871(15) Uani 1 1 d U D .
H13A H 0.1900 0.6596 0.8217 0.104 Uiso 1 1 calc R . .
H13B H 0.1548 0.5531 0.8810 0.104 Uiso 1 1 calc R . .
C14 C 0.1011(9) 0.6712(8) 0.9590(7) 0.0898(16) Uani 1 1 d U . .
H14A H 0.1459 0.7198 0.9853 0.108 Uiso 1 1 calc R C 3
H14B H 0.0807 0.6195 1.0166 0.108 Uiso 1 1 calc R C 3
C15 C -0.010(2) 0.728(2) 0.9391(18) 0.0876(18) Uani 0.458(16) 1 d PU D 3
H15A H 0.0167 0.7911 0.9001 0.105 Uiso 0.458(16) 1 calc PR D 3
H15B H -0.0361 0.6894 0.8887 0.105 Uiso 0.458(16) 1 calc PR D 3
C16 C -0.098(2) 0.756(2) 0.9844(16) 0.0865(17) Uani 0.458(16) 1 d PU D 3
H16A H -0.0902 0.8271 0.9935 0.104 Uiso 0.458(16) 1 calc PR D 3
H16B H -0.1015 0.7175 1.0526 0.104 Uiso 0.458(16) 1 calc PR D 3
C15' C -0.0264(18) 0.6699(19) 0.9140(14) 0.0865(18) Uani 0.542(16) 1 d PU D 4
H15C H -0.0305 0.7242 0.8571 0.104 Uiso 0.542(16) 1 calc PR D 4
H15D H -0.0297 0.6047 0.8869 0.104 Uiso 0.542(16) 1 calc PR D 4
C16' C -0.1102(18) 0.681(2) 0.9760(14) 0.0873(17) Uani 0.542(16) 1 d PU D 4
H16C H -0.0829 0.7069 1.0344 0.105 Uiso 0.542(16) 1 calc PR D 4
H16D H -0.1374 0.6133 1.0001 0.105 Uiso 0.542(16) 1 calc PR D 4
C17 C -0.3155(9) 0.7832(8) 1.0027(7) 0.0828(17) Uani 1 1 d U D .
H17 H -0.3255 0.7811 1.0743 0.099 Uiso 1 1 calc R . .
C18 C -0.3425(9) 0.8135(8) 0.8498(7) 0.0868(19) Uani 1 1 d U D .
H18 H -0.3804 0.8352 0.7917 0.104 Uiso 1 1 calc R . .
C19 C 0.2437(6) 0.1527(5) 0.4291(5) 0.0440(12) Uani 1 1 d U . .
C20 C 0.2537(7) 0.2568(6) 0.3978(5) 0.0525(13) Uani 1 1 d U . .
H20 H 0.3254 0.2870 0.3910 0.063 Uiso 1 1 calc R . .
C21 C 0.1486(7) 0.3145(6) 0.3766(6) 0.0570(13) Uani 1 1 d U . .
H21 H 0.1499 0.3848 0.3548 0.068 Uiso 1 1 calc R . .
C22 C 0.0464(7) 0.2681(6) 0.3879(6) 0.0579(13) Uani 1 1 d U . .
H22 H -0.0220 0.3075 0.3740 0.069 Uiso 1 1 calc R . .
C23 C 0.0403(7) 0.1688(6) 0.4182(6) 0.0565(13) Uani 1 1 d U . .
H23 H -0.0316 0.1392 0.4242 0.068 Uiso 1 1 calc R . .
C24 C 0.1388(7) 0.1087(6) 0.4407(5) 0.0531(13) Uani 1 1 d U . .
H24 H 0.1340 0.0389 0.4637 0.064 Uiso 1 1 calc R . .
N1 N 0.6963(6) 0.5252(5) 0.4721(5) 0.0608(18) Uani 1 1 d . . .
N3 N 0.8136(6) 0.6015(5) 0.3498(5) 0.0674(18) Uani 1 1 d U B .
N2 N 0.8643(8) 0.5069(6) 0.3683(7) 0.091(2) Uani 1 1 d U . .
N4 N 1.1522(6) 0.9774(6) 0.1295(5) 0.0693(17) Uani 1 1 d U . .
N5 N 1.1268(7) 1.0013(6) 0.0304(6) 0.0837(19) Uani 1 1 d U B .
N6 N 1.3022(6) 0.9253(5) 0.0315(5) 0.0566(17) Uani 1 1 d . . .
N7 N 0.4908(7) 0.4986(5) 0.7141(5) 0.0614(18) Uani 1 1 d . . .
N8 N 0.3935(8) 0.4388(6) 0.8665(6) 0.086(2) Uani 1 1 d U . .
N9 N 0.3807(6) 0.5432(5) 0.8504(5) 0.0610(18) Uani 1 1 d . . .
N10 N -0.2191(8) 0.7514(7) 0.9489(6) 0.094(2) Uani 1 1 d U . .
N11 N -0.2332(9) 0.7764(8) 0.8450(7) 0.107(2) Uani 1 1 d U D .
N12 N -0.3940(6) 0.8173(5) 0.9454(5) 0.064(2) Uani 1 1 d . . .
O1 O 0.7698(4) 0.2231(3) 0.5345(3) 0.0452(11) Uani 1 1 d . . .
O2 O 0.5573(4) 0.3235(3) 0.5704(3) 0.0433(11) Uani 1 1 d . . .
O3 O 0.6030(4) 0.1263(3) 0.6704(3) 0.0322(9) Uani 1 1 d . . .
O5 O 0.3813(4) 0.2023(3) 0.7540(3) 0.0433(11) Uani 1 1 d . . .
O6 O 0.4815(4) 0.0255(3) 0.8409(3) 0.0411(11) Uani 1 1 d . . .
O4 O 0.4399(3) 0.1346(3) 0.5509(3) 0.0279(9) Uani 1 1 d . . .
O7 O 0.3129(4) 0.0189(3) 0.7101(3) 0.0334(10) Uani 1 1 d . . .
O8 O 0.3742(4) -0.1784(3) 0.8023(3) 0.0424(11) Uani 1 1 d . . .
O9 O 0.1847(4) -0.1453(4) 0.6984(3) 0.0476(12) Uani 1 1 d . . .
O10 O 0.3974(4) -0.2266(3) 0.6033(3) 0.0347(10) Uani 1 1 d . . .
O11 O 0.3366(3) -0.0460(3) 0.5178(3) 0.0293(9) Uani 1 1 d . . .
O12 O 0.4779(3) 0.0608(3) 0.3574(3) 0.0258(9) Uani 1 1 d . . .
 
loop_
 _atom_site_aniso_label
 _atom_site_aniso_U_11
 _atom_site_aniso_U_22
 _atom_site_aniso_U_33
 _atom_site_aniso_U_23
 _atom_site_aniso_U_13
 _atom_site_aniso_U_12
Cu1 0.0647(7) 0.0614(6) 0.0562(6) -0.0013(5) 0.0071(5) -0.0101(5)
Cu2 0.0662(8) 0.0794(8) 0.1071(10) 0.0024(7) 0.0375(7) 0.0054(6)
As1 0.0239(3) 0.0266(3) 0.0210(3) -0.0012(2) -0.0002(2) 0.0015(2)
Mo1 0.0322(3) 0.0301(3) 0.0274(3) -0.0033(2) 0.0009(2) -0.0037(2)
Mo2 0.0334(3) 0.0343(3) 0.0224(2) -0.0033(2) 0.0012(2) -0.0026(2)
Mo3 0.0304(3) 0.0357(3) 0.0249(3) -0.0012(2) 0.0022(2) -0.0047(2)
C1 0.087(4) 0.067(4) 0.083(4) 0.005(3) 0.019(3) -0.002(3)
C2 0.073(3) 0.064(3) 0.061(3) -0.005(3) 0.008(3) -0.005(3)
C3 0.076(3) 0.072(3) 0.063(3) -0.002(2) 0.009(2) -0.005(3)
C4 0.076(3) 0.075(3) 0.062(3) -0.005(3) 0.008(3) -0.005(3)
C5 0.076(3) 0.078(3) 0.061(3) -0.005(3) 0.009(3) -0.006(3)
C4' 0.076(3) 0.074(3) 0.061(3) -0.005(3) 0.009(3) -0.006(3)
C5' 0.075(3) 0.077(3) 0.061(3) -0.004(2) 0.011(3) -0.005(3)
C6 0.080(3) 0.083(3) 0.063(3) -0.007(2) 0.009(2) -0.003(3)
C7 0.081(3) 0.087(3) 0.067(3) -0.013(3) 0.011(3) -0.007(3)
C8 0.072(3) 0.079(3) 0.053(3) -0.007(2) 0.004(3) -0.006(3)
C9 0.080(4) 0.092(4) 0.051(3) -0.016(3) -0.003(3) 0.002(4)
C10 0.090(4) 0.068(4) 0.068(4) 0.002(3) 0.012(3) -0.001(3)
C11 0.077(4) 0.070(3) 0.065(3) 0.009(3) 0.009(3) 0.003(3)
C12 0.079(4) 0.082(3) 0.067(3) 0.004(3) 0.006(3) 0.007(3)
C13 0.081(3) 0.097(3) 0.073(3) 0.008(3) 0.002(3) 0.010(3)
C14 0.082(3) 0.104(3) 0.074(3) 0.008(3) 0.001(3) 0.013(3)
C15 0.080(4) 0.103(4) 0.070(3) 0.007(3) 0.001(3) 0.013(3)
C16 0.080(3) 0.103(4) 0.068(3) 0.006(3) 0.000(3) 0.015(3)
C15' 0.080(4) 0.102(4) 0.069(3) 0.006(3) 0.001(3) 0.014(3)
C16' 0.080(3) 0.104(4) 0.068(3) 0.007(3) 0.000(3) 0.013(3)
C17 0.077(4) 0.102(4) 0.060(3) 0.005(3) 0.004(3) 0.013(3)
C18 0.077(4) 0.111(4) 0.063(3) 0.003(3) -0.001(3) 0.020(3)
C19 0.040(3) 0.052(2) 0.042(2) -0.015(2) -0.013(2) 0.015(2)
C20 0.050(3) 0.056(3) 0.051(2) -0.012(2) -0.012(2) 0.015(2)
C21 0.055(3) 0.059(3) 0.056(2) -0.012(2) -0.010(2) 0.017(2)
C22 0.050(3) 0.068(3) 0.055(2) -0.013(2) -0.014(2) 0.021(2)
C23 0.048(3) 0.067(3) 0.054(2) -0.016(2) -0.009(2) 0.013(2)
C24 0.046(3) 0.061(3) 0.053(2) -0.014(2) -0.010(2) 0.012(2)
N1 0.059(5) 0.046(4) 0.073(4) -0.006(3) 0.009(3) -0.007(3)
N3 0.065(4) 0.047(3) 0.079(4) 0.002(3) 0.021(3) 0.003(3)
N2 0.086(5) 0.059(4) 0.109(5) 0.004(4) 0.038(4) 0.008(3)
N4 0.050(4) 0.097(4) 0.064(3) -0.030(3) 0.002(3) -0.006(3)
N5 0.068(3) 0.107(4) 0.081(3) -0.024(3) -0.018(3) 0.004(3)
N6 0.048(4) 0.069(4) 0.048(3) -0.003(3) 0.007(3) 0.002(3)
N7 0.082(5) 0.049(4) 0.050(4) 0.000(3) 0.002(3) -0.009(4)
N8 0.106(5) 0.065(4) 0.079(4) -0.001(3) 0.015(4) -0.014(3)
N9 0.077(5) 0.048(4) 0.053(4) 0.002(3) 0.005(3) -0.003(3)
N10 0.084(4) 0.127(4) 0.068(3) -0.004(3) -0.018(3) 0.014(3)
N11 0.096(4) 0.141(4) 0.079(3) -0.008(3) -0.013(3) 0.017(3)
N12 0.057(5) 0.080(5) 0.044(3) -0.002(3) 0.022(3) 0.016(4)
O1 0.040(3) 0.052(3) 0.043(2) -0.003(2) -0.002(2) -0.009(2)
O2 0.050(3) 0.036(2) 0.043(2) -0.0100(19) 0.003(2) -0.003(2)
O3 0.031(2) 0.039(2) 0.026(2) -0.0020(18) -0.0034(17) -0.0065(19)
O5 0.051(3) 0.041(2) 0.037(2) -0.009(2) 0.001(2) -0.004(2)
O6 0.046(3) 0.047(3) 0.030(2) 0.0002(19) -0.005(2) -0.008(2)
O4 0.032(2) 0.029(2) 0.0211(18) -0.0008(16) 0.0002(16) 0.0000(17)
O7 0.030(2) 0.037(2) 0.031(2) -0.0011(17) 0.0052(17) -0.0010(19)
O8 0.052(3) 0.044(3) 0.030(2) 0.0029(19) -0.002(2) -0.007(2)
O9 0.040(3) 0.058(3) 0.045(3) -0.014(2) 0.005(2) -0.010(2)
O10 0.044(3) 0.032(2) 0.025(2) 0.0040(17) 0.0000(18) -0.0016(19)
O11 0.028(2) 0.030(2) 0.0278(19) 0.0028(16) -0.0008(17) -0.0023(18)
O12 0.025(2) 0.030(2) 0.0224(18) -0.0025(16) -0.0014(16) -0.0016(17)
 
_geom_special_details
;
 All s.u.'s (except the s.u. in the dihedral angle between two l.s. planes)
 are estimated using the full covariance matrix.  The cell s.u.'s are taken
 into account individually in the estimation of s.u.'s in distances, angles
 and torsion angles; correlations between s.u.'s in cell parameters are only
 used when they are defined by crystal symmetry.  An approximate (isotropic)
 treatment of cell s.u.'s is used for estimating s.u.'s involving l.s. planes.
;
 
loop_
 _geom_bond_atom_site_label_1
 _geom_bond_atom_site_label_2
 _geom_bond_distance
 _geom_bond_site_symmetry_2
 _geom_bond_publ_flag
Cu1 N1 1.876(7) . ?
Cu1 N7 1.881(7) . ?
Cu1 O2 2.324(4) . ?
Cu2 N6 1.882(6) . ?
Cu2 N12 1.885(6) 1_754 ?
As1 O12 1.693(4) . ?
As1 O11 1.703(4) . ?
As1 O4 1.713(4) . ?
As1 C19 1.906(6) . ?
Mo1 O1 1.693(5) . ?
Mo1 O2 1.718(4) . ?
Mo1 O3 1.906(4) . ?
Mo1 O10 1.910(4) 2_656 ?
Mo1 O11 2.318(4) 2_656 ?
Mo1 O4 2.369(4) . ?
Mo2 O6 1.709(4) . ?
Mo2 O5 1.709(4) . ?
Mo2 O7 1.897(4) . ?
Mo2 O3 1.911(4) . ?
Mo2 O4 2.306(3) . ?
Mo2 O12 2.369(4) 2_656 ?
Mo3 O9 1.699(5) . ?
Mo3 O8 1.717(4) . ?
Mo3 O7 1.903(4) . ?
Mo3 O10 1.912(4) . ?
Mo3 O11 2.325(3) . ?
Mo3 O12 2.393(4) 2_656 ?
C1 N2 1.310(11) . ?
C1 N1 1.363(11) . ?
C1 H1 0.9300 . ?
C2 N3 1.287(10) . ?
C2 N1 1.325(10) . ?
C2 H2 0.9300 . ?
C3 N3 1.447(10) . ?
C3 C4' 1.464(15) . ?
C3 C4 1.56(4) . ?
C3 H3A 0.9700 . ?
C3 H3B 0.9700 . ?
C4 C5 1.51(4) . ?
C4 H4A 0.9700 . ?
C4 H4B 0.9700 . ?
C5 C6 1.80(3) . ?
C5 H5A 0.9700 . ?
C5 H5B 0.9700 . ?
C4' C5' 1.534(16) . ?
C4' H4'1 0.9700 . ?
C4' H4'2 0.9700 . ?
C5' C6 1.364(15) . ?
C5' H5'1 0.9700 . ?
C5' H5'2 0.9700 . ?
C6 C7 1.439(11) . ?
C6 H6A 0.9700 . ?
C6 H6B 0.9700 . ?
C7 N4 1.440(10) . ?
C7 H7A 0.9700 . ?
C7 H7B 0.9700 . ?
C8 N4 1.299(11) . ?
C8 N6 1.323(9) . ?
C8 H8 0.9300 . ?
C9 N5 1.270(11) . ?
C9 N6 1.313(10) . ?
C9 H9 0.9300 . ?
C10 N8 1.297(11) . ?
C10 N7 1.345(10) . ?
C10 H10 0.9300 . ?
C11 N7 1.306(10) . ?
C11 N9 1.319(10) . ?
C11 H11 0.9300 . ?
C12 N9 1.450(10) . ?
C12 C13 1.518(13) . ?
C12 H12A 0.9700 . ?
C12 H12B 0.9700 . ?
C13 C14 1.432(13) . ?
C13 H13A 0.9700 . ?
C13 H13B 0.9700 . ?
C14 C15 1.46(2) . ?
C14 C15' 1.65(2) . ?
C14 H14A 0.9700 . ?
C14 H14B 0.9700 . ?
C15 C16 1.17(3) . ?
C15 H15A 0.9700 . ?
C15 H15B 0.9700 . ?
C16 N10 1.53(3) . ?
C16 H16A 0.9700 . ?
C16 H16B 0.9700 . ?
C15' C16' 1.19(2) . ?
C15' H15C 0.9700 . ?
C15' H15D 0.9700 . ?
C16' N10 1.545(19) . ?
C16' H16C 0.9700 . ?
C16' H16D 0.9700 . ?
C17 N12 1.268(11) . ?
C17 N10 1.303(11) . ?
C17 H17 0.9300 . ?
C18 N11 1.307(12) . ?
C18 N12 1.325(10) . ?
C18 H18 0.9300 . ?
C19 C24 1.360(10) . ?
C19 C20 1.383(10) . ?
C20 C21 1.414(10) . ?
C20 H20 0.9300 . ?
C21 C22 1.347(11) . ?
C21 H21 0.9300 . ?
C22 C23 1.317(10) . ?
C22 H22 0.9300 . ?
C23 C24 1.369(10) . ?
C23 H23 0.9300 . ?
C24 H24 0.9300 . ?
N3 N2 1.334(9) . ?
N4 N5 1.365(10) . ?
N8 N9 1.357(9) . ?
N10 N11 1.392(11) . ?
N12 Cu2 1.885(6) 1_356 ?
O10 Mo1 1.910(4) 2_656 ?
O11 Mo1 2.318(4) 2_656 ?
O12 Mo2 2.369(4) 2_656 ?
O12 Mo3 2.393(4) 2_656 ?
 
loop_
 _geom_angle_atom_site_label_1
 _geom_angle_atom_site_label_2
 _geom_angle_atom_site_label_3
 _geom_angle
 _geom_angle_site_symmetry_1
 _geom_angle_site_symmetry_3
 _geom_angle_publ_flag
N1 Cu1 N7 161.7(3) . . ?
N1 Cu1 O2 100.4(2) . . ?
N7 Cu1 O2 95.8(2) . . ?
N6 Cu2 N12 168.8(3) . 1_754 ?
O12 As1 O11 110.66(18) . . ?
O12 As1 O4 110.64(18) . . ?
O11 As1 O4 111.95(18) . . ?
O12 As1 C19 109.9(2) . . ?
O11 As1 C19 106.8(3) . . ?
O4 As1 C19 106.8(2) . . ?
O1 Mo1 O2 104.3(2) . . ?
O1 Mo1 O3 98.23(19) . . ?
O2 Mo1 O3 100.73(18) . . ?
O1 Mo1 O10 101.7(2) . 2_656 ?
O2 Mo1 O10 96.91(18) . 2_656 ?
O3 Mo1 O10 149.10(18) . 2_656 ?
O1 Mo1 O11 91.07(18) . 2_656 ?
O2 Mo1 O11 163.74(19) . 2_656 ?
O3 Mo1 O11 82.03(14) . 2_656 ?
O10 Mo1 O11 74.31(14) 2_656 2_656 ?
O1 Mo1 O4 163.51(17) . . ?
O2 Mo1 O4 91.42(18) . . ?
O3 Mo1 O4 73.45(15) . . ?
O10 Mo1 O4 81.00(16) 2_656 . ?
O11 Mo1 O4 73.89(13) 2_656 . ?
O6 Mo2 O5 104.0(2) . . ?
O6 Mo2 O7 99.91(19) . . ?
O5 Mo2 O7 98.4(2) . . ?
O6 Mo2 O3 98.02(19) . . ?
O5 Mo2 O3 101.1(2) . . ?
O7 Mo2 O3 149.32(16) . . ?
O6 Mo2 O4 164.47(17) . . ?
O5 Mo2 O4 91.08(16) . . ?
O7 Mo2 O4 81.35(15) . . ?
O3 Mo2 O4 74.90(15) . . ?
O6 Mo2 O12 90.58(17) . 2_656 ?
O5 Mo2 O12 165.06(17) . 2_656 ?
O7 Mo2 O12 75.33(15) . 2_656 ?
O3 Mo2 O12 79.81(15) . 2_656 ?
O4 Mo2 O12 74.68(12) . 2_656 ?
O9 Mo3 O8 104.2(2) . . ?
O9 Mo3 O7 98.4(2) . . ?
O8 Mo3 O7 100.86(19) . . ?
O9 Mo3 O10 101.1(2) . . ?
O8 Mo3 O10 97.91(18) . . ?
O7 Mo3 O10 148.60(16) . . ?
O9 Mo3 O11 94.57(18) . . ?
O8 Mo3 O11 160.81(19) . . ?
O7 Mo3 O11 80.06(14) . . ?
O10 Mo3 O11 74.10(14) . . ?
O9 Mo3 O12 167.14(17) . 2_656 ?
O8 Mo3 O12 87.90(18) . 2_656 ?
O7 Mo3 O12 74.64(15) . 2_656 ?
O10 Mo3 O12 81.17(16) . 2_656 ?
O11 Mo3 O12 73.77(13) . 2_656 ?
N2 C1 N1 113.1(8) . . ?
N2 C1 H1 123.5 . . ?
N1 C1 H1 123.5 . . ?
N3 C2 N1 111.6(8) . . ?
N3 C2 H2 124.2 . . ?
N1 C2 H2 124.2 . . ?
N3 C3 C4' 115.6(8) . . ?
N3 C3 C4 102.3(13) . . ?
C4' C3 C4 40.6(12) . . ?
N3 C3 H3A 111.3 . . ?
C4' C3 H3A 70.8 . . ?
C4 C3 H3A 111.3 . . ?
N3 C3 H3B 111.3 . . ?
C4' C3 H3B 129.2 . . ?
C4 C3 H3B 111.3 . . ?
H3A C3 H3B 109.2 . . ?
C5 C4 C3 116(2) . . ?
C5 C4 H4A 108.3 . . ?
C3 C4 H4A 108.3 . . ?
C5 C4 H4B 108.3 . . ?
C3 C4 H4B 108.3 . . ?
H4A C4 H4B 107.4 . . ?
C4 C5 C6 129(2) . . ?
C4 C5 H5A 105.0 . . ?
C6 C5 H5A 105.0 . . ?
C4 C5 H5B 105.0 . . ?
C6 C5 H5B 105.0 . . ?
H5A C5 H5B 105.9 . . ?
C3 C4' C5' 117.0(10) . . ?
C3 C4' H4'1 108.0 . . ?
C5' C4' H4'1 108.0 . . ?
C3 C4' H4'2 108.0 . . ?
C5' C4' H4'2 108.0 . . ?
H4'1 C4' H4'2 107.3 . . ?
C6 C5' C4' 117.1(10) . . ?
C6 C5' H5'1 108.0 . . ?
C4' C5' H5'1 108.0 . . ?
C6 C5' H5'2 108.0 . . ?
C4' C5' H5'2 108.0 . . ?
H5'1 C5' H5'2 107.3 . . ?
C5' C6 C7 118.3(9) . . ?
C5' C6 C5 45.5(13) . . ?
C7 C6 C5 133.2(12) . . ?
C5' C6 H6A 66.7 . . ?
C7 C6 H6A 103.9 . . ?
C5 C6 H6A 103.9 . . ?
C5' C6 H6B 137.8 . . ?
C7 C6 H6B 103.9 . . ?
C5 C6 H6B 103.9 . . ?
H6A C6 H6B 105.4 . . ?
C6 C7 N4 111.2(8) . . ?
C6 C7 H7A 109.4 . . ?
N4 C7 H7A 109.4 . . ?
C6 C7 H7B 109.4 . . ?
N4 C7 H7B 109.4 . . ?
H7A C7 H7B 108.0 . . ?
N4 C8 N6 108.9(8) . . ?
N4 C8 H8 125.5 . . ?
N6 C8 H8 125.5 . . ?
N5 C9 N6 114.8(8) . . ?
N5 C9 H9 122.6 . . ?
N6 C9 H9 122.6 . . ?
N8 C10 N7 116.6(8) . . ?
N8 C10 H10 121.7 . . ?
N7 C10 H10 121.7 . . ?
N7 C11 N9 111.5(8) . . ?
N7 C11 H11 124.2 . . ?
N9 C11 H11 124.2 . . ?
N9 C12 C13 108.8(8) . . ?
N9 C12 H12A 109.9 . . ?
C13 C12 H12A 109.9 . . ?
N9 C12 H12B 109.9 . . ?
C13 C12 H12B 109.9 . . ?
H12A C12 H12B 108.3 . . ?
C14 C13 C12 113.2(9) . . ?
C14 C13 H13A 108.9 . . ?
C12 C13 H13A 108.9 . . ?
C14 C13 H13B 108.9 . . ?
C12 C13 H13B 108.9 . . ?
H13A C13 H13B 107.8 . . ?
C13 C14 C15 128.3(14) . . ?
C13 C14 C15' 104.9(11) . . ?
C15 C14 C15' 33.1(12) . . ?
C13 C14 H14A 105.2 . . ?
C15 C14 H14A 105.2 . . ?
C15' C14 H14A 138.2 . . ?
C13 C14 H14B 105.2 . . ?
C15 C14 H14B 105.2 . . ?
C15' C14 H14B 93.3 . . ?
H14A C14 H14B 105.9 . . ?
C16 C15 C14 139(2) . . ?
C16 C15 H15A 102.2 . . ?
C14 C15 H15A 102.2 . . ?
C16 C15 H15B 102.2 . . ?
C14 C15 H15B 102.2 . . ?
H15A C15 H15B 104.8 . . ?
C15 C16 N10 124(2) . . ?
C15 C16 H16A 106.2 . . ?
N10 C16 H16A 106.2 . . ?
C15 C16 H16B 106.2 . . ?
N10 C16 H16B 106.2 . . ?
H16A C16 H16B 106.4 . . ?
C16' C15' C14 114.6(18) . . ?
C16' C15' H15C 108.6 . . ?
C14 C15' H15C 108.6 . . ?
C16' C15' H15D 108.6 . . ?
C14 C15' H15D 108.6 . . ?
H15C C15' H15D 107.6 . . ?
C15' C16' N10 121.6(16) . . ?
C15' C16' H16C 106.9 . . ?
N10 C16' H16C 106.9 . . ?
C15' C16' H16D 106.9 . . ?
N10 C16' H16D 106.9 . . ?
H16C C16' H16D 106.7 . . ?
N12 C17 N10 111.6(8) . . ?
N12 C17 H17 124.2 . . ?
N10 C17 H17 124.2 . . ?
N11 C18 N12 113.4(9) . . ?
N11 C18 H18 123.3 . . ?
N12 C18 H18 123.3 . . ?
C24 C19 C20 122.2(6) . . ?
C24 C19 As1 119.8(5) . . ?
C20 C19 As1 118.0(6) . . ?
C19 C20 C21 115.9(8) . . ?
C19 C20 H20 122.0 . . ?
C21 C20 H20 122.0 . . ?
C22 C21 C20 120.3(8) . . ?
C22 C21 H21 119.9 . . ?
C20 C21 H21 119.9 . . ?
C23 C22 C21 122.0(7) . . ?
C23 C22 H22 119.0 . . ?
C21 C22 H22 119.0 . . ?
C22 C23 C24 120.6(8) . . ?
C22 C23 H23 119.7 . . ?
C24 C23 H23 119.7 . . ?
C19 C24 C23 119.0(8) . . ?
C19 C24 H24 120.5 . . ?
C23 C24 H24 120.5 . . ?
C2 N1 C1 101.6(7) . . ?
C2 N1 Cu1 131.8(6) . . ?
C1 N1 Cu1 125.7(6) . . ?
C2 N3 N2 110.0(7) . . ?
C2 N3 C3 130.5(7) . . ?
N2 N3 C3 119.3(7) . . ?
C1 N2 N3 103.5(7) . . ?
C8 N4 N5 109.1(7) . . ?
C8 N4 C7 132.2(8) . . ?
N5 N4 C7 118.5(7) . . ?
C9 N5 N4 103.0(7) . . ?
C9 N6 C8 104.0(7) . . ?
C9 N6 Cu2 125.5(6) . . ?
C8 N6 Cu2 130.2(6) . . ?
C11 N7 C10 101.1(7) . . ?
C11 N7 Cu1 131.2(6) . . ?
C10 N7 Cu1 127.6(6) . . ?
C10 N8 N9 101.3(7) . . ?
C11 N9 N8 109.4(7) . . ?
C11 N9 C12 130.2(7) . . ?
N8 N9 C12 120.2(7) . . ?
C17 N10 N11 107.6(8) . . ?
C17 N10 C16 122.1(12) . . ?
N11 N10 C16 119.6(11) . . ?
C17 N10 C16' 133.7(10) . . ?
N11 N10 C16' 117.8(10) . . ?
C16 N10 C16' 38.5(11) . . ?
C18 N11 N10 101.9(8) . . ?
C17 N12 C18 105.2(8) . . ?
C17 N12 Cu2 131.4(6) . 1_356 ?
C18 N12 Cu2 122.9(6) . 1_356 ?
Mo1 O2 Cu1 146.3(3) . . ?
Mo1 O3 Mo2 118.7(2) . . ?
As1 O4 Mo2 128.77(19) . . ?
As1 O4 Mo1 130.66(19) . . ?
Mo2 O4 Mo1 89.23(13) . . ?
Mo2 O7 Mo3 118.9(2) . . ?
Mo1 O10 Mo3 117.86(19) 2_656 . ?
As1 O11 Mo1 130.8(2) . 2_656 ?
As1 O11 Mo3 129.9(2) . . ?
Mo1 O11 Mo3 89.67(12) 2_656 . ?
As1 O12 Mo2 130.39(19) . 2_656 ?
As1 O12 Mo3 130.08(19) . 2_656 ?
Mo2 O12 Mo3 86.82(12) 2_656 2_656 ?
 
loop_
 _geom_torsion_atom_site_label_1
 _geom_torsion_atom_site_label_2
 _geom_torsion_atom_site_label_3
 _geom_torsion_atom_site_label_4
 _geom_torsion
 _geom_torsion_site_symmetry_1
 _geom_torsion_site_symmetry_2
 _geom_torsion_site_symmetry_3
 _geom_torsion_site_symmetry_4
 _geom_torsion_publ_flag
N3 C3 C4 C5 -172(2) . . . . ?
C4' C3 C4 C5 -57(2) . . . . ?
C3 C4 C5 C6 80(4) . . . . ?
N3 C3 C4' C5' -174.6(10) . . . . ?
C4 C3 C4' C5' 107(2) . . . . ?
C3 C4' C5' C6 -174.5(11) . . . . ?
C4' C5' C6 C7 -172.6(10) . . . . ?
C4' C5' C6 C5 63.3(16) . . . . ?
C4 C5 C6 C5' -67(3) . . . . ?
C4 C5 C6 C7 -156(3) . . . . ?
C5' C6 C7 N4 -59.9(13) . . . . ?
C5 C6 C7 N4 -6(2) . . . . ?
N9 C12 C13 C14 177.4(8) . . . . ?
C12 C13 C14 C15 160.4(18) . . . . ?
C12 C13 C14 C15' -173.1(11) . . . . ?
C13 C14 C15 C16 159(4) . . . . ?
C15' C14 C15 C16 107(5) . . . . ?
C14 C15 C16 N10 -139(4) . . . . ?
C13 C14 C15' C16' 158.6(19) . . . . ?
C15 C14 C15' C16' -61(2) . . . . ?
C14 C15' C16' N10 138(2) . . . . ?
O12 As1 C19 C24 114.7(5) . . . . ?
O11 As1 C19 C24 -5.3(6) . . . . ?
O4 As1 C19 C24 -125.2(5) . . . . ?
O12 As1 C19 C20 -68.9(6) . . . . ?
O11 As1 C19 C20 171.0(5) . . . . ?
O4 As1 C19 C20 51.1(6) . . . . ?
C24 C19 C20 C21 -1.1(10) . . . . ?
As1 C19 C20 C21 -177.4(5) . . . . ?
C19 C20 C21 C22 0.4(10) . . . . ?
C20 C21 C22 C23 -0.3(12) . . . . ?
C21 C22 C23 C24 0.9(12) . . . . ?
C20 C19 C24 C23 1.7(10) . . . . ?
As1 C19 C24 C23 177.9(5) . . . . ?
C22 C23 C24 C19 -1.5(11) . . . . ?
N3 C2 N1 C1 2.7(11) . . . . ?
N3 C2 N1 Cu1 172.1(7) . . . . ?
N2 C1 N1 C2 -4.6(12) . . . . ?
N2 C1 N1 Cu1 -174.8(7) . . . . ?
N7 Cu1 N1 C2 -60.2(14) . . . . ?
O2 Cu1 N1 C2 148.3(8) . . . . ?
N7 Cu1 N1 C1 106.9(11) . . . . ?
O2 Cu1 N1 C1 -44.6(8) . . . . ?
N1 C2 N3 N2 -0.1(11) . . . . ?
N1 C2 N3 C3 -175.6(9) . . . . ?
C4' C3 N3 C2 66.5(14) . . . . ?
C4 C3 N3 C2 107.2(17) . . . . ?
C4' C3 N3 N2 -108.7(11) . . . . ?
C4 C3 N3 N2 -67.9(16) . . . . ?
N1 C1 N2 N3 4.6(13) . . . . ?
C2 N3 N2 C1 -2.7(12) . . . . ?
C3 N3 N2 C1 173.4(9) . . . . ?
N6 C8 N4 N5 -2.1(11) . . . . ?
N6 C8 N4 C7 -177.6(9) . . . . ?
C6 C7 N4 C8 -65.3(14) . . . . ?
C6 C7 N4 N5 119.5(10) . . . . ?
N6 C9 N5 N4 -2.6(12) . . . . ?
C8 N4 N5 C9 2.8(10) . . . . ?
C7 N4 N5 C9 179.0(8) . . . . ?
N5 C9 N6 C8 1.4(12) . . . . ?
N5 C9 N6 Cu2 -172.8(7) . . . . ?
N4 C8 N6 C9 0.5(11) . . . . ?
N4 C8 N6 Cu2 174.4(6) . . . . ?
N12 Cu2 N6 C9 -154.6(15) 1_754 . . . ?
N12 Cu2 N6 C8 33(2) 1_754 . . . ?
N9 C11 N7 C10 0.4(11) . . . . ?
N9 C11 N7 Cu1 179.0(6) . . . . ?
N8 C10 N7 C11 1.4(12) . . . . ?
N8 C10 N7 Cu1 -177.2(7) . . . . ?
N1 Cu1 N7 C11 50.0(15) . . . . ?
O2 Cu1 N7 C11 -158.1(8) . . . . ?
N1 Cu1 N7 C10 -131.8(10) . . . . ?
O2 Cu1 N7 C10 20.1(8) . . . . ?
N7 C10 N8 N9 -2.5(12) . . . . ?
N7 C11 N9 N8 -2.0(11) . . . . ?
N7 C11 N9 C12 -176.3(9) . . . . ?
C10 N8 N9 C11 2.6(11) . . . . ?
C10 N8 N9 C12 177.6(9) . . . . ?
C13 C12 N9 C11 80.1(13) . . . . ?
C13 C12 N9 N8 -93.7(10) . . . . ?
N12 C17 N10 N11 6.0(13) . . . . ?
N12 C17 N10 C16 150.1(15) . . . . ?
N12 C17 N10 C16' -162.6(17) . . . . ?
C15 C16 N10 C17 180(2) . . . . ?
C15 C16 N10 N11 -40(3) . . . . ?
C15 C16 N10 C16' 58(3) . . . . ?
C15' C16' N10 C17 -173(2) . . . . ?
C15' C16' N10 N11 19(3) . . . . ?
C15' C16' N10 C16 -85(3) . . . . ?
N12 C18 N11 N10 2.5(13) . . . . ?
C17 N10 N11 C18 -4.9(13) . . . . ?
C16 N10 N11 C18 -150.1(15) . . . . ?
C16' N10 N11 C18 165.8(15) . . . . ?
N10 C17 N12 C18 -4.3(13) . . . . ?
N10 C17 N12 Cu2 -175.9(7) . . . 1_356 ?
N11 C18 N12 C17 0.9(14) . . . . ?
N11 C18 N12 Cu2 173.4(8) . . . 1_356 ?
O1 Mo1 O2 Cu1 13.1(5) . . . . ?
O3 Mo1 O2 Cu1 114.6(4) . . . . ?
O10 Mo1 O2 Cu1 -90.9(4) 2_656 . . . ?
O11 Mo1 O2 Cu1 -147.0(4) 2_656 . . . ?
O4 Mo1 O2 Cu1 -172.0(4) . . . . ?
N1 Cu1 O2 Mo1 36.8(5) . . . . ?
N7 Cu1 O2 Mo1 -134.6(5) . . . . ?
O1 Mo1 O3 Mo2 177.4(2) . . . . ?
O2 Mo1 O3 Mo2 71.1(3) . . . . ?
O10 Mo1 O3 Mo2 -52.7(4) 2_656 . . . ?
O11 Mo1 O3 Mo2 -92.7(2) 2_656 . . . ?
O4 Mo1 O3 Mo2 -17.22(19) . . . . ?
O6 Mo2 O3 Mo1 -176.6(2) . . . . ?
O5 Mo2 O3 Mo1 -70.5(3) . . . . ?
O7 Mo2 O3 Mo1 58.1(4) . . . . ?
O4 Mo2 O3 Mo1 17.58(19) . . . . ?
O12 Mo2 O3 Mo1 94.3(2) 2_656 . . . ?
O12 As1 O4 Mo2 -130.0(2) . . . . ?
O11 As1 O4 Mo2 -6.1(3) . . . . ?
C19 As1 O4 Mo2 110.4(3) . . . . ?
O12 As1 O4 Mo1 1.8(3) . . . . ?
O11 As1 O4 Mo1 125.8(2) . . . . ?
C19 As1 O4 Mo1 -117.7(3) . . . . ?
O6 Mo2 O4 As1 68.8(8) . . . . ?
O5 Mo2 O4 As1 -125.5(3) . . . . ?
O7 Mo2 O4 As1 -27.1(3) . . . . ?
O3 Mo2 O4 As1 133.3(3) . . . . ?
O12 Mo2 O4 As1 50.0(2) 2_656 . . . ?
O6 Mo2 O4 Mo1 -76.8(7) . . . . ?
O5 Mo2 O4 Mo1 88.96(18) . . . . ?
O7 Mo2 O4 Mo1 -172.69(15) . . . . ?
O3 Mo2 O4 Mo1 -12.30(14) . . . . ?
O12 Mo2 O4 Mo1 -95.63(13) 2_656 . . . ?
O1 Mo1 O4 As1 -70.6(6) . . . . ?
O2 Mo1 O4 As1 127.1(3) . . . . ?
O3 Mo1 O4 As1 -132.1(3) . . . . ?
O10 Mo1 O4 As1 30.4(2) 2_656 . . . ?
O11 Mo1 O4 As1 -45.8(2) 2_656 . . . ?
O1 Mo1 O4 Mo2 73.9(6) . . . . ?
O2 Mo1 O4 Mo2 -88.36(17) . . . . ?
O3 Mo1 O4 Mo2 12.42(14) . . . . ?
O10 Mo1 O4 Mo2 174.87(15) 2_656 . . . ?
O11 Mo1 O4 Mo2 98.71(13) 2_656 . . . ?
O6 Mo2 O7 Mo3 -68.9(2) . . . . ?
O5 Mo2 O7 Mo3 -174.8(2) . . . . ?
O3 Mo2 O7 Mo3 56.0(4) . . . . ?
O4 Mo2 O7 Mo3 95.4(2) . . . . ?
O12 Mo2 O7 Mo3 19.05(18) 2_656 . . . ?
O9 Mo3 O7 Mo2 172.1(2) . . . . ?
O8 Mo3 O7 Mo2 65.8(3) . . . . ?
O10 Mo3 O7 Mo2 -59.8(4) . . . . ?
O11 Mo3 O7 Mo2 -94.7(2) . . . . ?
O12 Mo3 O7 Mo2 -18.91(18) 2_656 . . . ?
O9 Mo3 O10 Mo1 73.5(3) . . . 2_656 ?
O8 Mo3 O10 Mo1 179.7(3) . . . 2_656 ?
O7 Mo3 O10 Mo1 -53.9(5) . . . 2_656 ?
O11 Mo3 O10 Mo1 -18.1(2) . . . 2_656 ?
O12 Mo3 O10 Mo1 -93.7(2) 2_656 . . 2_656 ?
O12 As1 O11 Mo1 -5.4(3) . . . 2_656 ?
O4 As1 O11 Mo1 -129.3(2) . . . 2_656 ?
C19 As1 O11 Mo1 114.2(3) . . . 2_656 ?
O12 As1 O11 Mo3 130.1(2) . . . . ?
O4 As1 O11 Mo3 6.1(3) . . . . ?
C19 As1 O11 Mo3 -110.4(3) . . . . ?
O9 Mo3 O11 As1 124.9(3) . . . . ?
O8 Mo3 O11 As1 -67.3(6) . . . . ?
O7 Mo3 O11 As1 27.2(3) . . . . ?
O10 Mo3 O11 As1 -134.8(3) . . . . ?
O12 Mo3 O11 As1 -49.6(2) 2_656 . . . ?
O9 Mo3 O11 Mo1 -87.18(18) . . . 2_656 ?
O8 Mo3 O11 Mo1 80.6(5) . . . 2_656 ?
O7 Mo3 O11 Mo1 175.07(17) . . . 2_656 ?
O10 Mo3 O11 Mo1 13.10(16) . . . 2_656 ?
O12 Mo3 O11 Mo1 98.32(14) 2_656 . . 2_656 ?
O11 As1 O12 Mo2 1.5(3) . . . 2_656 ?
O4 As1 O12 Mo2 126.2(2) . . . 2_656 ?
C19 As1 O12 Mo2 -116.1(3) . . . 2_656 ?
O11 As1 O12 Mo3 -126.9(2) . . . 2_656 ?
O4 As1 O12 Mo3 -2.2(3) . . . 2_656 ?
C19 As1 O12 Mo3 115.5(3) . . . 2_656 ?
 
_diffrn_measured_fraction_theta_max    0.994
_diffrn_reflns_theta_full              26.02
_diffrn_measured_fraction_theta_full   0.994
_refine_diff_density_max    0.939
_refine_diff_density_min   -0.870
_refine_diff_density_rms    0.124


#===================================================

 
data_4
 
_audit_creation_method            SHELXL-97
_chemical_name_systematic
;
 ?
;
_chemical_name_common             ?
_chemical_melting_point           ?
_chemical_formula_moiety         'C16 H21 As Cu2 Mo3 N6 O12'
_chemical_formula_sum
 'C16 H21 As Cu2 Mo3 N6 O12'
_chemical_formula_weight          979.06
 
loop_
 _atom_type_symbol
 _atom_type_description
 _atom_type_scat_dispersion_real
 _atom_type_scat_dispersion_imag
 _atom_type_scat_source
 'C'  'C'   0.0030   0.0020
 'International Tables Vol C Tables 4.2.6.8 and 6.1.1.4'
 'H'  'H'   0.0000   0.0000
 'International Tables Vol C Tables 4.2.6.8 and 6.1.1.4'
 'As'  'As'   0.0500   2.0060
 'International Tables Vol C Tables 4.2.6.8 and 6.1.1.4'
 'Cu'  'Cu'   0.3200   1.2650
 'International Tables Vol C Tables 4.2.6.8 and 6.1.1.4'
 'Mo'  'Mo'  -1.6830   0.6860
 'International Tables Vol C Tables 4.2.6.8 and 6.1.1.4'
 'N'  'N'   0.0060   0.0030
 'International Tables Vol C Tables 4.2.6.8 and 6.1.1.4'
 'O'  'O'   0.0110   0.0060
 'International Tables Vol C Tables 4.2.6.8 and 6.1.1.4'
 
_symmetry_cell_setting            Monoclinic
_symmetry_space_group_name_H-M     P2(1)/c
 
loop_
 _symmetry_equiv_pos_as_xyz
 'x, y, z'
 '-x, y+1/2, -z+1/2'
 '-x, -y, -z'
 'x, -y-1/2, z-1/2'
 
_cell_length_a                    11.4377(2)
_cell_length_b                    19.3351(3)
_cell_length_c                    14.3898(4)
_cell_angle_alpha                 90.00
_cell_angle_beta                  128.4860(10)
_cell_angle_gamma                 90.00
_cell_volume                      2490.97(9)
_cell_formula_units_Z             4
_cell_measurement_temperature     293(2)
_cell_measurement_reflns_used     6935
_cell_measurement_theta_min       3.0149
_cell_measurement_theta_max       29.1667
 
_exptl_crystal_description        block
_exptl_crystal_colour             brown
_exptl_crystal_size_max           0.20
_exptl_crystal_size_mid           0.19
_exptl_crystal_size_min           0.15
_exptl_crystal_density_meas       ?
_exptl_crystal_density_diffrn     2.611
_exptl_crystal_density_method     'not measured'
_exptl_crystal_F_000              1887
_exptl_absorpt_coefficient_mu     4.542
_exptl_absorpt_correction_type    multi-scan
_exptl_absorpt_correction_T_min   0.4636
_exptl_absorpt_correction_T_max   0.5490
_exptl_absorpt_process_details    'CrysAlis (Oxford Diffraction, 2006)'
 
_exptl_special_details
;
 ?
;
 
_diffrn_ambient_temperature       293(2)
_diffrn_radiation_wavelength      0.71073
_diffrn_radiation_type            MoK\a
_diffrn_radiation_source          'fine-focus sealed tube'
_diffrn_radiation_monochromator   graphite
_diffrn_measurement_device_type   'Oxford Diffraction Gemini R Ultra'
_diffrn_measurement_method        '\w scan'
_diffrn_detector_area_resol_mean  10.0
_diffrn_standards_number          ?
_diffrn_standards_interval_count  ?
_diffrn_standards_interval_time   ?
_diffrn_standards_decay_%         ?
_diffrn_reflns_number             10705
_diffrn_reflns_av_R_equivalents   0.0201
_diffrn_reflns_av_sigmaI/netI     0.0353
_diffrn_reflns_limit_h_min        -11
_diffrn_reflns_limit_h_max        14
_diffrn_reflns_limit_k_min        -24
_diffrn_reflns_limit_k_max        17
_diffrn_reflns_limit_l_min        -17
_diffrn_reflns_limit_l_max        17
_diffrn_reflns_theta_min          3.02
_diffrn_reflns_theta_max          26.37
_reflns_number_total              5057
_reflns_number_gt                 4082
_reflns_threshold_expression      >2\s(I)
 
_computing_data_collection        'CrysAlis (Oxford Diffraction, 2006)'
_computing_cell_refinement        CrysAlis
_computing_data_reduction         CrysAlis
_computing_structure_solution     'SHELXL-97 (Sheldrick, 1997)'
_computing_structure_refinement   'SHELXL-97 (Sheldrick, 2008)'
_computing_molecular_graphics     ?
_computing_publication_material   ?
 
_refine_special_details
;
 Refinement of F^2^ against ALL reflections.  The weighted R-factor wR and
 goodness of fit S are based on F^2^, conventional R-factors R are based
 on F, with F set to zero for negative F^2^. The threshold expression of
 F^2^ > 2\s(F^2^) is used only for calculating R-factors(gt) etc. and is
 not relevant to the choice of reflections for refinement.  R-factors based
 on F^2^ are statistically about twice as large as those based on F, and R-
 factors based on ALL data will be even larger.
;
 
_refine_ls_structure_factor_coef  Fsqd
_refine_ls_matrix_type            full
_refine_ls_weighting_scheme       calc
_refine_ls_weighting_details
 'calc w=1/[\s^2^(Fo^2^)+(0.0253P)^2^+0.0000P] where P=(Fo^2^+2Fc^2^)/3'
_atom_sites_solution_primary      direct
_atom_sites_solution_secondary    difmap
_atom_sites_solution_hydrogens    geom
_refine_ls_hydrogen_treatment     constr
_refine_ls_extinction_method      none
_refine_ls_extinction_coef        ?
_refine_ls_number_reflns          5057
_refine_ls_number_parameters      361
_refine_ls_number_restraints      0
_refine_ls_R_factor_all           0.0309
_refine_ls_R_factor_gt            0.0224
_refine_ls_wR_factor_ref          0.0487
_refine_ls_wR_factor_gt           0.0478
_refine_ls_goodness_of_fit_ref    0.946
_refine_ls_restrained_S_all       0.946
_refine_ls_shift/su_max           0.002
_refine_ls_shift/su_mean          0.000
 
loop_
 _atom_site_label
 _atom_site_type_symbol
 _atom_site_fract_x
 _atom_site_fract_y
 _atom_site_fract_z
 _atom_site_U_iso_or_equiv
 _atom_site_adp_type
 _atom_site_occupancy
 _atom_site_symmetry_multiplicity
 _atom_site_calc_flag
 _atom_site_refinement_flags
 _atom_site_disorder_assembly
 _atom_site_disorder_group
Cu1 Cu -0.08043(5) 0.86882(2) 0.43041(4) 0.03242(11) Uani 1 1 d . . .
Cu2 Cu 0.38262(5) 0.71498(2) 0.44209(4) 0.03219(11) Uani 1 1 d . . .
As1 As 0.63847(3) 0.951376(15) 0.61119(3) 0.01568(7) Uani 1 1 d . . .
Mo1 Mo 0.24460(3) 0.888730(13) 0.44126(2) 0.01867(7) Uani 1 1 d . . .
Mo2 Mo 0.35150(3) 1.011378(14) 0.63524(3) 0.01854(7) Uani 1 1 d . . .
Mo3 Mo 0.40350(3) 0.874633(14) 0.31547(2) 0.01997(7) Uani 1 1 d . . .
C1 C -0.3542(4) 0.83784(17) 0.1791(3) 0.0252(7) Uani 1 1 d . . .
H1 H -0.3436 0.8765 0.1464 0.030 Uiso 1 1 calc R . .
C2 C -0.4415(4) 0.74789(17) 0.1952(3) 0.0271(8) Uani 1 1 d . . .
H2 H -0.5016 0.7100 0.1793 0.033 Uiso 1 1 calc R . .
C3 C -0.2509(4) 0.73468(18) 0.4183(3) 0.0342(8) Uani 1 1 d . . .
H3A H -0.2649 0.7655 0.4639 0.041 Uiso 1 1 calc R . .
H3B H -0.1444 0.7302 0.4603 0.041 Uiso 1 1 calc R . .
C4 C -0.3138(4) 0.66506(18) 0.4111(3) 0.0326(8) Uani 1 1 d . . .
H4A H -0.3256 0.6381 0.3489 0.039 Uiso 1 1 calc R . .
H4B H -0.4116 0.6708 0.3907 0.039 Uiso 1 1 calc R . .
C5 C -0.2117(4) 0.62643(18) 0.5290(3) 0.0330(8) Uani 1 1 d . . .
H5A H -0.1132 0.6216 0.5505 0.040 Uiso 1 1 calc R . .
H5B H -0.2019 0.6528 0.5909 0.040 Uiso 1 1 calc R . .
C6 C -0.2744(4) 0.55606(18) 0.5194(3) 0.0346(9) Uani 1 1 d . . .
H6A H -0.2796 0.5299 0.4594 0.042 Uiso 1 1 calc R . .
H6B H -0.3759 0.5618 0.4917 0.042 Uiso 1 1 calc R . .
C7 C -0.1885(4) 0.51364(17) 0.6326(3) 0.0302(8) Uani 1 1 d . . .
H7A H -0.0877 0.5055 0.6604 0.036 Uiso 1 1 calc R . .
H7B H -0.1825 0.5386 0.6939 0.036 Uiso 1 1 calc R . .
C8 C -0.2668(4) 0.44570(17) 0.6087(3) 0.0306(8) Uani 1 1 d . . .
H8A H -0.3687 0.4545 0.5778 0.037 Uiso 1 1 calc R . .
H8B H -0.2707 0.4209 0.5482 0.037 Uiso 1 1 calc R . .
C9 C -0.0864(4) 0.41737(17) 0.8267(3) 0.0243(7) Uani 1 1 d . . .
H9 H -0.0352 0.4592 0.8540 0.029 Uiso 1 1 calc R . .
C10 C -0.1612(4) 0.31637(18) 0.8169(3) 0.0292(8) Uani 1 1 d . . .
H10 H -0.1705 0.2728 0.8391 0.035 Uiso 1 1 calc R . .
C11 C 0.8001(3) 0.89786(15) 0.7338(3) 0.0185(7) Uani 1 1 d . . .
C12 C 0.8913(4) 0.92362(19) 0.8470(3) 0.0323(8) Uani 1 1 d . . .
H12 H 0.8697 0.9660 0.8638 0.039 Uiso 1 1 calc R . .
C13 C 1.0158(4) 0.8865(2) 0.9364(4) 0.0440(10) Uani 1 1 d . . .
H13 H 1.0782 0.9041 1.0132 0.053 Uiso 1 1 calc R . .
C14 C 1.0470(4) 0.8237(2) 0.9116(4) 0.0432(10) Uani 1 1 d . . .
H14 H 1.1308 0.7989 0.9718 0.052 Uiso 1 1 calc R . .
C15 C 0.9552(4) 0.7973(2) 0.7982(4) 0.0408(10) Uani 1 1 d . . .
H15 H 0.9771 0.7547 0.7824 0.049 Uiso 1 1 calc R . .
C16 C 0.8298(4) 0.83380(18) 0.7069(3) 0.0329(8) Uani 1 1 d . . .
H16 H 0.7674 0.8162 0.6302 0.040 Uiso 1 1 calc R . .
N1 N -0.4657(3) 0.79203(14) 0.1138(2) 0.0255(6) Uani 1 1 d . . .
N2 N -0.2614(3) 0.82345(14) 0.2928(2) 0.0248(6) Uani 1 1 d . . .
N3 N -0.3202(3) 0.76540(13) 0.3017(2) 0.0228(6) Uani 1 1 d . . .
N4 N -0.1935(3) 0.40234(13) 0.7142(2) 0.0230(6) Uani 1 1 d . . .
N5 N -0.2432(3) 0.33700(14) 0.7060(3) 0.0279(6) Uani 1 1 d . . .
N6 N -0.0620(3) 0.36420(14) 0.8958(2) 0.0239(6) Uani 1 1 d . . .
O1 O 0.0621(2) 0.90147(11) 0.3834(2) 0.0277(5) Uani 1 1 d . . .
O2 O 0.2709(2) 0.80100(11) 0.4642(2) 0.0283(5) Uani 1 1 d . . .
O3 O 0.2296(2) 0.89428(11) 0.30291(19) 0.0222(5) Uani 1 1 d . . .
O4 O 0.4979(2) 0.89760(10) 0.51002(18) 0.0179(5) Uani 1 1 d . . .
O5 O 0.3457(2) 0.91528(11) 0.60276(19) 0.0213(5) Uani 1 1 d . . .
O6 O 0.5836(2) 1.00512(10) 0.67140(19) 0.0197(5) Uani 1 1 d . . .
O7 O 0.1683(2) 1.02705(11) 0.5727(2) 0.0265(5) Uani 1 1 d . . .
O8 O 0.4385(3) 1.00812(12) 0.7830(2) 0.0323(6) Uani 1 1 d . . .
O9 O 0.3966(2) 1.10328(10) 0.61733(19) 0.0204(5) Uani 1 1 d . . .
O10 O 0.3244(3) 0.87651(13) 0.1699(2) 0.0366(6) Uani 1 1 d . . .
O11 O 0.4258(2) 0.78782(11) 0.3509(2) 0.0301(6) Uani 1 1 d . . .
O12 O 0.7064(2) 0.99703(10) 0.55224(19) 0.0181(5) Uani 1 1 d . . .
 
loop_
 _atom_site_aniso_label
 _atom_site_aniso_U_11
 _atom_site_aniso_U_22
 _atom_site_aniso_U_33
 _atom_site_aniso_U_23
 _atom_site_aniso_U_13
 _atom_site_aniso_U_12
Cu1 0.0274(2) 0.0348(3) 0.0215(2) -0.00360(19) 0.0085(2) 0.00003(19)
Cu2 0.0318(2) 0.0303(2) 0.0190(2) -0.00386(19) 0.0082(2) -0.0018(2)
As1 0.01415(14) 0.01469(16) 0.01702(17) 0.00217(13) 0.00912(14) 0.00084(13)
Mo1 0.01560(13) 0.01643(14) 0.02292(16) 0.00144(11) 0.01147(13) -0.00019(11)
Mo2 0.01753(13) 0.01871(14) 0.01992(15) 0.00259(11) 0.01192(12) 0.00154(11)
Mo3 0.01723(13) 0.02095(15) 0.02021(15) -0.00302(12) 0.01089(12) -0.00226(11)
C1 0.0269(17) 0.0219(18) 0.0217(19) -0.0001(14) 0.0126(16) -0.0033(15)
C2 0.0255(17) 0.0265(18) 0.023(2) 0.0008(15) 0.0119(17) -0.0039(15)
C3 0.038(2) 0.035(2) 0.023(2) 0.0050(16) 0.0155(18) -0.0022(17)
C4 0.038(2) 0.033(2) 0.027(2) 0.0056(16) 0.0207(18) 0.0038(17)
C5 0.039(2) 0.033(2) 0.030(2) 0.0048(16) 0.0228(19) -0.0005(17)
C6 0.043(2) 0.030(2) 0.026(2) 0.0002(16) 0.0192(19) -0.0042(17)
C7 0.0346(19) 0.0256(19) 0.025(2) 0.0029(15) 0.0163(18) 0.0017(16)
C8 0.0318(18) 0.0271(19) 0.0207(19) 0.0022(15) 0.0104(16) -0.0001(16)
C9 0.0242(17) 0.0230(17) 0.0219(18) -0.0046(15) 0.0125(16) -0.0025(15)
C10 0.0331(19) 0.0246(19) 0.0219(19) -0.0009(15) 0.0132(17) -0.0069(16)
C11 0.0170(15) 0.0188(16) 0.0179(17) 0.0071(13) 0.0100(14) 0.0028(13)
C12 0.0276(18) 0.035(2) 0.027(2) 0.0032(16) 0.0135(17) 0.0041(16)
C13 0.0256(19) 0.065(3) 0.027(2) 0.008(2) 0.0098(18) 0.007(2)
C14 0.029(2) 0.051(3) 0.042(3) 0.023(2) 0.018(2) 0.0170(19)
C15 0.039(2) 0.030(2) 0.058(3) 0.014(2) 0.032(2) 0.0141(18)
C16 0.0291(19) 0.030(2) 0.035(2) 0.0011(16) 0.0173(18) 0.0036(16)
N1 0.0283(15) 0.0207(14) 0.0191(16) 0.0010(12) 0.0106(13) -0.0002(12)
N2 0.0253(14) 0.0254(15) 0.0218(16) -0.0032(12) 0.0137(14) -0.0038(12)
N3 0.0240(14) 0.0222(15) 0.0195(16) 0.0009(12) 0.0122(13) -0.0002(12)
N4 0.0238(14) 0.0193(14) 0.0197(15) -0.0007(11) 0.0105(13) -0.0036(12)
N5 0.0298(15) 0.0220(15) 0.0212(16) -0.0005(12) 0.0107(14) -0.0052(13)
N6 0.0254(14) 0.0229(15) 0.0164(15) -0.0016(12) 0.0095(13) -0.0017(12)
O1 0.0206(11) 0.0309(13) 0.0302(14) 0.0039(11) 0.0151(11) 0.0004(10)
O2 0.0264(12) 0.0202(12) 0.0341(15) 0.0013(10) 0.0168(12) -0.0010(10)
O3 0.0161(10) 0.0262(12) 0.0214(13) -0.0020(10) 0.0103(10) -0.0035(9)
O4 0.0163(10) 0.0168(11) 0.0189(12) -0.0007(9) 0.0101(10) -0.0018(9)
O5 0.0243(11) 0.0180(11) 0.0234(13) 0.0055(9) 0.0157(11) 0.0011(9)
O6 0.0166(10) 0.0208(11) 0.0207(12) 0.0013(9) 0.0112(10) 0.0017(9)
O7 0.0239(12) 0.0237(12) 0.0344(15) 0.0048(10) 0.0194(12) 0.0027(10)
O8 0.0357(14) 0.0359(14) 0.0234(14) 0.0052(11) 0.0174(12) 0.0054(11)
O9 0.0187(10) 0.0192(11) 0.0237(13) -0.0001(9) 0.0135(10) 0.0006(9)
O10 0.0286(13) 0.0524(17) 0.0234(14) -0.0063(12) 0.0134(12) 0.0002(12)
O11 0.0291(13) 0.0223(12) 0.0407(16) -0.0056(11) 0.0226(13) -0.0044(10)
O12 0.0197(11) 0.0139(11) 0.0218(12) 0.0020(9) 0.0136(10) -0.0010(9)
 
_geom_special_details
;
 All s.u.'s (except the s.u. in the dihedral angle between two l.s. planes)
 are estimated using the full covariance matrix.  The cell s.u.'s are taken
 into account individually in the estimation of s.u.'s in distances, angles
 and torsion angles; correlations between s.u.'s in cell parameters are only
 used when they are defined by crystal symmetry.  An approximate (isotropic)
 treatment of cell s.u.'s is used for estimating s.u.'s involving l.s. planes.
;
 
loop_
 _geom_bond_atom_site_label_1
 _geom_bond_atom_site_label_2
 _geom_bond_distance
 _geom_bond_site_symmetry_2
 _geom_bond_publ_flag
Cu1 N6 1.961(3) 2_556 ?
Cu1 N2 1.968(3) . ?
Cu1 O1 2.211(2) . ?
Cu1 O7 2.238(2) 3_576 ?
Cu2 N1 1.949(3) 4_676 ?
Cu2 N5 1.966(3) 3_566 ?
Cu2 O11 2.181(2) . ?
Cu2 O2 2.237(2) . ?
As1 O4 1.695(2) . ?
As1 O6 1.7033(19) . ?
As1 O12 1.7100(18) . ?
As1 C11 1.882(3) . ?
Mo1 O1 1.717(2) . ?
Mo1 O2 1.719(2) . ?
Mo1 O3 1.892(2) . ?
Mo1 O5 1.912(2) . ?
Mo1 O12 2.2663(19) 3_676 ?
Mo1 O4 2.4155(18) . ?
Mo1 Mo2 3.2653(4) . ?
Mo1 Mo3 3.2785(4) . ?
Mo2 O8 1.698(2) . ?
Mo2 O7 1.716(2) . ?
Mo2 O5 1.907(2) . ?
Mo2 O9 1.912(2) . ?
Mo2 O12 2.349(2) 3_676 ?
Mo2 O6 2.3692(19) . ?
Mo2 Mo3 3.2771(4) 3_676 ?
Mo3 O10 1.688(2) . ?
Mo3 O11 1.726(2) . ?
Mo3 O9 1.895(2) 3_676 ?
Mo3 O3 1.9202(19) . ?
Mo3 O6 2.330(2) 3_676 ?
Mo3 O4 2.332(2) . ?
Mo3 Mo2 3.2771(4) 3_676 ?
C1 N2 1.312(4) . ?
C1 N1 1.343(4) . ?
C1 H1 0.9300 . ?
C2 N3 1.320(4) . ?
C2 N1 1.332(4) . ?
C2 H2 0.9300 . ?
C3 N3 1.463(4) . ?
C3 C4 1.499(5) . ?
C3 H3A 0.9700 . ?
C3 H3B 0.9700 . ?
C4 C5 1.528(5) . ?
C4 H4A 0.9700 . ?
C4 H4B 0.9700 . ?
C5 C6 1.504(5) . ?
C5 H5A 0.9700 . ?
C5 H5B 0.9700 . ?
C6 C7 1.516(5) . ?
C6 H6A 0.9700 . ?
C6 H6B 0.9700 . ?
C7 C8 1.504(5) . ?
C7 H7A 0.9700 . ?
C7 H7B 0.9700 . ?
C8 N4 1.458(4) . ?
C8 H8A 0.9700 . ?
C8 H8B 0.9700 . ?
C9 N4 1.318(4) . ?
C9 N6 1.334(4) . ?
C9 H9 0.9300 . ?
C10 N5 1.312(4) . ?
C10 N6 1.352(4) . ?
C10 H10 0.9300 . ?
C11 C12 1.369(5) . ?
C11 C16 1.401(4) . ?
C12 C13 1.384(5) . ?
C12 H12 0.9300 . ?
C13 C14 1.375(5) . ?
C13 H13 0.9300 . ?
C14 C15 1.376(6) . ?
C14 H14 0.9300 . ?
C15 C16 1.391(5) . ?
C15 H15 0.9300 . ?
C16 H16 0.9300 . ?
N1 Cu2 1.949(3) 4_475 ?
N2 N3 1.355(4) . ?
N4 N5 1.360(4) . ?
N5 Cu2 1.966(3) 3_566 ?
N6 Cu1 1.961(3) 2_546 ?
O6 Mo3 2.330(2) 3_676 ?
O7 Cu1 2.238(2) 3_576 ?
O9 Mo3 1.8954(19) 3_676 ?
O12 Mo1 2.2663(19) 3_676 ?
O12 Mo2 2.349(2) 3_676 ?
 
loop_
 _geom_angle_atom_site_label_1
 _geom_angle_atom_site_label_2
 _geom_angle_atom_site_label_3
 _geom_angle
 _geom_angle_site_symmetry_1
 _geom_angle_site_symmetry_3
 _geom_angle_publ_flag
N6 Cu1 N2 141.41(11) 2_556 . ?
N6 Cu1 O1 102.59(10) 2_556 . ?
N2 Cu1 O1 109.47(10) . . ?
N6 Cu1 O7 94.16(10) 2_556 3_576 ?
N2 Cu1 O7 101.71(10) . 3_576 ?
O1 Cu1 O7 98.31(8) . 3_576 ?
N1 Cu2 N5 145.12(12) 4_676 3_566 ?
N1 Cu2 O11 116.86(10) 4_676 . ?
N5 Cu2 O11 90.71(10) 3_566 . ?
N1 Cu2 O2 90.46(10) 4_676 . ?
N5 Cu2 O2 112.61(10) 3_566 . ?
O11 Cu2 O2 88.20(8) . . ?
O4 As1 O6 111.00(9) . . ?
O4 As1 O12 111.81(10) . . ?
O6 As1 O12 111.27(9) . . ?
O4 As1 C11 108.74(12) . . ?
O6 As1 C11 108.44(12) . . ?
O12 As1 C11 105.33(11) . . ?
O1 Mo1 O2 104.47(10) . . ?
O1 Mo1 O3 101.21(10) . . ?
O2 Mo1 O3 98.51(10) . . ?
O1 Mo1 O5 100.62(10) . . ?
O2 Mo1 O5 97.51(10) . . ?
O3 Mo1 O5 148.64(9) . . ?
O1 Mo1 O12 94.28(9) . 3_676 ?
O2 Mo1 O12 160.88(9) . 3_676 ?
O3 Mo1 O12 81.17(8) . 3_676 ?
O5 Mo1 O12 74.99(8) . 3_676 ?
O1 Mo1 O4 167.10(9) . . ?
O2 Mo1 O4 88.23(8) . . ?
O3 Mo1 O4 74.18(8) . . ?
O5 Mo1 O4 79.57(8) . . ?
O12 Mo1 O4 73.22(7) 3_676 . ?
O1 Mo1 Mo2 90.34(8) . . ?
O2 Mo1 Mo2 128.70(8) . . ?
O3 Mo1 Mo2 126.79(6) . . ?
O5 Mo1 Mo2 31.20(6) . . ?
O12 Mo1 Mo2 46.00(5) 3_676 . ?
O4 Mo1 Mo2 83.26(5) . . ?
O1 Mo1 Mo3 131.94(8) . . ?
O2 Mo1 Mo3 86.13(7) . . ?
O3 Mo1 Mo3 30.93(6) . . ?
O5 Mo1 Mo3 124.71(6) . . ?
O12 Mo1 Mo3 84.05(5) 3_676 . ?
O4 Mo1 Mo3 45.28(5) . . ?
Mo2 Mo1 Mo3 119.409(10) . . ?
O8 Mo2 O7 103.64(11) . . ?
O8 Mo2 O5 100.07(10) . . ?
O7 Mo2 O5 101.46(10) . . ?
O8 Mo2 O9 101.92(10) . . ?
O7 Mo2 O9 96.26(9) . . ?
O5 Mo2 O9 147.52(8) . . ?
O8 Mo2 O12 164.26(9) . 3_676 ?
O7 Mo2 O12 91.72(9) . 3_676 ?
O5 Mo2 O12 73.09(8) . 3_676 ?
O9 Mo2 O12 79.42(8) . 3_676 ?
O8 Mo2 O6 91.15(9) . . ?
O7 Mo2 O6 163.67(9) . . ?
O5 Mo2 O6 82.37(8) . . ?
O9 Mo2 O6 73.60(8) . . ?
O12 Mo2 O6 74.07(7) 3_676 . ?
O8 Mo2 Mo1 131.27(8) . . ?
O7 Mo2 Mo1 89.68(8) . . ?
O5 Mo2 Mo1 31.29(6) . . ?
O9 Mo2 Mo1 123.27(6) . . ?
O12 Mo2 Mo1 43.95(5) 3_676 . ?
O6 Mo2 Mo1 85.58(5) . . ?
O8 Mo2 Mo3 89.91(8) . 3_676 ?
O7 Mo2 Mo3 126.53(7) . 3_676 ?
O5 Mo2 Mo3 127.08(6) . 3_676 ?
O9 Mo2 Mo3 30.46(6) . 3_676 ?
O12 Mo2 Mo3 83.52(5) 3_676 3_676 ?
O6 Mo2 Mo3 45.29(5) . 3_676 ?
Mo1 Mo2 Mo3 119.228(10) . 3_676 ?
O10 Mo3 O11 104.71(12) . . ?
O10 Mo3 O9 99.98(10) . 3_676 ?
O11 Mo3 O9 99.13(9) . 3_676 ?
O10 Mo3 O3 98.91(10) . . ?
O11 Mo3 O3 100.03(9) . . ?
O9 Mo3 O3 148.60(9) 3_676 . ?
O10 Mo3 O6 92.13(10) . 3_676 ?
O11 Mo3 O6 162.95(10) . 3_676 ?
O9 Mo3 O6 74.84(8) 3_676 3_676 ?
O3 Mo3 O6 79.62(8) . 3_676 ?
O10 Mo3 O4 167.39(10) . . ?
O11 Mo3 O4 87.59(9) . . ?
O9 Mo3 O4 80.46(8) 3_676 . ?
O3 Mo3 O4 75.75(8) . . ?
O6 Mo3 O4 75.76(7) 3_676 . ?
O10 Mo3 Mo2 88.85(8) . 3_676 ?
O11 Mo3 Mo2 129.84(7) . 3_676 ?
O9 Mo3 Mo2 30.75(6) 3_676 3_676 ?
O3 Mo3 Mo2 125.70(6) . 3_676 ?
O6 Mo3 Mo2 46.28(5) 3_676 3_676 ?
O4 Mo3 Mo2 85.26(5) . 3_676 ?
O10 Mo3 Mo1 129.06(8) . . ?
O11 Mo3 Mo1 87.06(7) . . ?
O9 Mo3 Mo1 127.35(6) 3_676 . ?
O3 Mo3 Mo1 30.42(6) . . ?
O6 Mo3 Mo1 84.33(5) 3_676 . ?
O4 Mo3 Mo1 47.39(4) . . ?
Mo2 Mo3 Mo1 121.182(10) 3_676 . ?
N2 C1 N1 114.3(3) . . ?
N2 C1 H1 122.8 . . ?
N1 C1 H1 122.8 . . ?
N3 C2 N1 110.5(3) . . ?
N3 C2 H2 124.8 . . ?
N1 C2 H2 124.8 . . ?
N3 C3 C4 113.0(3) . . ?
N3 C3 H3A 109.0 . . ?
C4 C3 H3A 109.0 . . ?
N3 C3 H3B 109.0 . . ?
C4 C3 H3B 109.0 . . ?
H3A C3 H3B 107.8 . . ?
C3 C4 C5 111.1(3) . . ?
C3 C4 H4A 109.4 . . ?
C5 C4 H4A 109.4 . . ?
C3 C4 H4B 109.4 . . ?
C5 C4 H4B 109.4 . . ?
H4A C4 H4B 108.0 . . ?
C6 C5 C4 110.4(3) . . ?
C6 C5 H5A 109.6 . . ?
C4 C5 H5A 109.6 . . ?
C6 C5 H5B 109.6 . . ?
C4 C5 H5B 109.6 . . ?
H5A C5 H5B 108.1 . . ?
C5 C6 C7 115.9(3) . . ?
C5 C6 H6A 108.3 . . ?
C7 C6 H6A 108.3 . . ?
C5 C6 H6B 108.3 . . ?
C7 C6 H6B 108.3 . . ?
H6A C6 H6B 107.4 . . ?
C8 C7 C6 109.3(3) . . ?
C8 C7 H7A 109.8 . . ?
C6 C7 H7A 109.8 . . ?
C8 C7 H7B 109.8 . . ?
C6 C7 H7B 109.8 . . ?
H7A C7 H7B 108.3 . . ?
N4 C8 C7 112.9(3) . . ?
N4 C8 H8A 109.0 . . ?
C7 C8 H8A 109.0 . . ?
N4 C8 H8B 109.0 . . ?
C7 C8 H8B 109.0 . . ?
H8A C8 H8B 107.8 . . ?
N4 C9 N6 110.5(3) . . ?
N4 C9 H9 124.8 . . ?
N6 C9 H9 124.8 . . ?
N5 C10 N6 113.9(3) . . ?
N5 C10 H10 123.1 . . ?
N6 C10 H10 123.1 . . ?
C12 C11 C16 120.9(3) . . ?
C12 C11 As1 119.5(2) . . ?
C16 C11 As1 119.5(3) . . ?
C11 C12 C13 119.9(4) . . ?
C11 C12 H12 120.0 . . ?
C13 C12 H12 120.0 . . ?
C14 C13 C12 120.0(4) . . ?
C14 C13 H13 120.0 . . ?
C12 C13 H13 120.0 . . ?
C13 C14 C15 120.4(4) . . ?
C13 C14 H14 119.8 . . ?
C15 C14 H14 119.8 . . ?
C14 C15 C16 120.6(4) . . ?
C14 C15 H15 119.7 . . ?
C16 C15 H15 119.7 . . ?
C15 C16 C11 118.2(4) . . ?
C15 C16 H16 120.9 . . ?
C11 C16 H16 120.9 . . ?
C2 N1 C1 102.7(3) . . ?
C2 N1 Cu2 127.2(2) . 4_475 ?
C1 N1 Cu2 129.9(2) . 4_475 ?
C1 N2 N3 103.3(3) . . ?
C1 N2 Cu1 133.5(2) . . ?
N3 N2 Cu1 123.2(2) . . ?
C2 N3 N2 109.1(3) . . ?
C2 N3 C3 130.9(3) . . ?
N2 N3 C3 119.9(3) . . ?
C9 N4 N5 109.2(3) . . ?
C9 N4 C8 130.2(3) . . ?
N5 N4 C8 120.4(3) . . ?
C10 N5 N4 103.5(3) . . ?
C10 N5 Cu2 130.3(2) . 3_566 ?
N4 N5 Cu2 125.6(2) . 3_566 ?
C9 N6 C10 102.9(3) . . ?
C9 N6 Cu1 122.6(2) . 2_546 ?
C10 N6 Cu1 134.4(2) . 2_546 ?
Mo1 O1 Cu1 135.72(12) . . ?
Mo1 O2 Cu2 138.95(12) . . ?
Mo1 O3 Mo3 118.65(11) . . ?
As1 O4 Mo3 129.13(10) . . ?
As1 O4 Mo1 130.56(10) . . ?
Mo3 O4 Mo1 87.33(7) . . ?
Mo2 O5 Mo1 117.51(10) . . ?
As1 O6 Mo3 128.70(10) . 3_676 ?
As1 O6 Mo2 129.54(11) . . ?
Mo3 O6 Mo2 88.43(6) 3_676 . ?
Mo2 O7 Cu1 123.77(11) . 3_576 ?
Mo3 O9 Mo2 118.79(10) 3_676 . ?
Mo3 O11 Cu2 139.31(12) . . ?
As1 O12 Mo1 131.26(10) . 3_676 ?
As1 O12 Mo2 130.06(11) . 3_676 ?
Mo1 O12 Mo2 90.04(7) 3_676 3_676 ?
 
loop_
 _geom_torsion_atom_site_label_1
 _geom_torsion_atom_site_label_2
 _geom_torsion_atom_site_label_3
 _geom_torsion_atom_site_label_4
 _geom_torsion
 _geom_torsion_site_symmetry_1
 _geom_torsion_site_symmetry_2
 _geom_torsion_site_symmetry_3
 _geom_torsion_site_symmetry_4
 _geom_torsion_publ_flag
O1 Mo1 Mo2 O8 105.17(13) . . . . ?
O2 Mo1 Mo2 O8 -3.79(14) . . . . ?
O3 Mo1 Mo2 O8 -150.51(13) . . . . ?
O5 Mo1 Mo2 O8 -5.08(15) . . . . ?
O12 Mo1 Mo2 O8 -159.20(13) 3_676 . . . ?
O4 Mo1 Mo2 O8 -86.06(12) . . . . ?
Mo3 Mo1 Mo2 O8 -114.42(10) . . . . ?
O1 Mo1 Mo2 O7 -2.82(10) . . . . ?
O2 Mo1 Mo2 O7 -111.78(12) . . . . ?
O3 Mo1 Mo2 O7 101.50(11) . . . . ?
O5 Mo1 Mo2 O7 -113.07(13) . . . . ?
O12 Mo1 Mo2 O7 92.81(10) 3_676 . . . ?
O4 Mo1 Mo2 O7 165.95(9) . . . . ?
Mo3 Mo1 Mo2 O7 137.59(7) . . . . ?
O1 Mo1 Mo2 O5 110.24(13) . . . . ?
O2 Mo1 Mo2 O5 1.29(14) . . . . ?
O3 Mo1 Mo2 O5 -145.44(13) . . . . ?
O12 Mo1 Mo2 O5 -154.13(13) 3_676 . . . ?
O4 Mo1 Mo2 O5 -80.98(12) . . . . ?
Mo3 Mo1 Mo2 O5 -109.34(11) . . . . ?
O1 Mo1 Mo2 O9 -100.10(10) . . . . ?
O2 Mo1 Mo2 O9 150.94(11) . . . . ?
O3 Mo1 Mo2 O9 4.22(10) . . . . ?
O5 Mo1 Mo2 O9 149.66(13) . . . . ?
O12 Mo1 Mo2 O9 -4.47(10) 3_676 . . . ?
O4 Mo1 Mo2 O9 68.67(9) . . . . ?
Mo3 Mo1 Mo2 O9 40.31(7) . . . . ?
O1 Mo1 Mo2 O12 -95.63(10) . . . 3_676 ?
O2 Mo1 Mo2 O12 155.41(11) . . . 3_676 ?
O3 Mo1 Mo2 O12 8.69(10) . . . 3_676 ?
O5 Mo1 Mo2 O12 154.13(13) . . . 3_676 ?
O4 Mo1 Mo2 O12 73.14(8) . . . 3_676 ?
Mo3 Mo1 Mo2 O12 44.78(7) . . . 3_676 ?
O1 Mo1 Mo2 O6 -167.18(9) . . . . ?
O2 Mo1 Mo2 O6 83.87(10) . . . . ?
O3 Mo1 Mo2 O6 -62.86(9) . . . . ?
O5 Mo1 Mo2 O6 82.58(12) . . . . ?
O12 Mo1 Mo2 O6 -71.55(9) 3_676 . . . ?
O4 Mo1 Mo2 O6 1.60(7) . . . . ?
Mo3 Mo1 Mo2 O6 -26.76(5) . . . . ?
O1 Mo1 Mo2 Mo3 -135.58(7) . . . 3_676 ?
O2 Mo1 Mo2 Mo3 115.46(9) . . . 3_676 ?
O3 Mo1 Mo2 Mo3 -31.26(8) . . . 3_676 ?
O5 Mo1 Mo2 Mo3 114.17(11) . . . 3_676 ?
O12 Mo1 Mo2 Mo3 -39.95(7) 3_676 . . 3_676 ?
O4 Mo1 Mo2 Mo3 33.19(5) . . . 3_676 ?
Mo3 Mo1 Mo2 Mo3 4.831(18) . . . 3_676 ?
O1 Mo1 Mo3 O10 -1.33(15) . . . . ?
O2 Mo1 Mo3 O10 104.68(14) . . . . ?
O3 Mo1 Mo3 O10 -8.99(16) . . . . ?
O5 Mo1 Mo3 O10 -158.85(13) . . . . ?
O12 Mo1 Mo3 O10 -91.74(12) 3_676 . . . ?
O4 Mo1 Mo3 O10 -163.98(13) . . . . ?
Mo2 Mo1 Mo3 O10 -122.37(11) . . . . ?
O1 Mo1 Mo3 O11 -107.93(13) . . . . ?
O2 Mo1 Mo3 O11 -1.92(11) . . . . ?
O3 Mo1 Mo3 O11 -115.59(15) . . . . ?
O5 Mo1 Mo3 O11 94.54(11) . . . . ?
O12 Mo1 Mo3 O11 161.66(10) 3_676 . . . ?
O4 Mo1 Mo3 O11 89.42(10) . . . . ?
Mo2 Mo1 Mo3 O11 131.02(8) . . . . ?
O1 Mo1 Mo3 O9 152.82(13) . . . 3_676 ?
O2 Mo1 Mo3 O9 -101.17(11) . . . 3_676 ?
O3 Mo1 Mo3 O9 145.16(15) . . . 3_676 ?
O5 Mo1 Mo3 O9 -4.71(11) . . . 3_676 ?
O12 Mo1 Mo3 O9 62.41(9) 3_676 . . 3_676 ?
O4 Mo1 Mo3 O9 -9.83(10) . . . 3_676 ?
Mo2 Mo1 Mo3 O9 31.78(8) . . . 3_676 ?
O1 Mo1 Mo3 O3 7.67(16) . . . . ?
O2 Mo1 Mo3 O3 113.68(15) . . . . ?
O5 Mo1 Mo3 O3 -149.86(14) . . . . ?
O12 Mo1 Mo3 O3 -82.75(13) 3_676 . . . ?
O4 Mo1 Mo3 O3 -154.98(14) . . . . ?
Mo2 Mo1 Mo3 O3 -113.38(12) . . . . ?
O1 Mo1 Mo3 O6 86.81(11) . . . 3_676 ?
O2 Mo1 Mo3 O6 -167.18(9) . . . 3_676 ?
O3 Mo1 Mo3 O6 79.14(13) . . . 3_676 ?
O5 Mo1 Mo3 O6 -70.72(9) . . . 3_676 ?
O12 Mo1 Mo3 O6 -3.61(7) 3_676 . . 3_676 ?
O4 Mo1 Mo3 O6 -75.84(8) . . . 3_676 ?
Mo2 Mo1 Mo3 O6 -34.24(5) . . . 3_676 ?
O1 Mo1 Mo3 O4 162.65(12) . . . . ?
O2 Mo1 Mo3 O4 -91.34(10) . . . . ?
O3 Mo1 Mo3 O4 154.98(14) . . . . ?
O5 Mo1 Mo3 O4 5.12(10) . . . . ?
O12 Mo1 Mo3 O4 72.23(9) 3_676 . . . ?
Mo2 Mo1 Mo3 O4 41.60(7) . . . . ?
O1 Mo1 Mo3 Mo2 116.12(10) . . . 3_676 ?
O2 Mo1 Mo3 Mo2 -137.87(8) . . . 3_676 ?
O3 Mo1 Mo3 Mo2 108.45(12) . . . 3_676 ?
O5 Mo1 Mo3 Mo2 -41.41(8) . . . 3_676 ?
O12 Mo1 Mo3 Mo2 25.70(6) 3_676 . . 3_676 ?
O4 Mo1 Mo3 Mo2 -46.53(7) . . . 3_676 ?
Mo2 Mo1 Mo3 Mo2 -4.929(19) . . . 3_676 ?
N3 C3 C4 C5 164.0(3) . . . . ?
C3 C4 C5 C6 -178.6(3) . . . . ?
C4 C5 C6 C7 -176.6(3) . . . . ?
C5 C6 C7 C8 179.0(3) . . . . ?
C6 C7 C8 N4 -178.4(3) . . . . ?
O4 As1 C11 C12 -148.2(2) . . . . ?
O6 As1 C11 C12 -27.4(3) . . . . ?
O12 As1 C11 C12 91.9(3) . . . . ?
O4 As1 C11 C16 35.1(3) . . . . ?
O6 As1 C11 C16 155.9(2) . . . . ?
O12 As1 C11 C16 -84.9(2) . . . . ?
C16 C11 C12 C13 0.7(5) . . . . ?
As1 C11 C12 C13 -176.0(3) . . . . ?
C11 C12 C13 C14 -0.4(5) . . . . ?
C12 C13 C14 C15 0.0(6) . . . . ?
C13 C14 C15 C16 0.2(6) . . . . ?
C14 C15 C16 C11 0.0(5) . . . . ?
C12 C11 C16 C15 -0.5(5) . . . . ?
As1 C11 C16 C15 176.2(2) . . . . ?
N3 C2 N1 C1 -1.8(4) . . . . ?
N3 C2 N1 Cu2 173.6(2) . . . 4_475 ?
N2 C1 N1 C2 2.4(4) . . . . ?
N2 C1 N1 Cu2 -172.9(2) . . . 4_475 ?
N1 C1 N2 N3 -2.0(3) . . . . ?
N1 C1 N2 Cu1 179.6(2) . . . . ?
N6 Cu1 N2 C1 171.8(3) 2_556 . . . ?
O1 Cu1 N2 C1 -43.7(3) . . . . ?
O7 Cu1 N2 C1 59.5(3) 3_576 . . . ?
N6 Cu1 N2 N3 -6.4(3) 2_556 . . . ?
O1 Cu1 N2 N3 138.1(2) . . . . ?
O7 Cu1 N2 N3 -118.6(2) 3_576 . . . ?
N1 C2 N3 N2 0.8(4) . . . . ?
N1 C2 N3 C3 178.1(3) . . . . ?
C1 N2 N3 C2 0.7(3) . . . . ?
Cu1 N2 N3 C2 179.3(2) . . . . ?
C1 N2 N3 C3 -177.0(3) . . . . ?
Cu1 N2 N3 C3 1.7(4) . . . . ?
C4 C3 N3 C2 12.3(5) . . . . ?
C4 C3 N3 N2 -170.7(3) . . . . ?
N6 C9 N4 N5 -0.3(3) . . . . ?
N6 C9 N4 C8 174.0(3) . . . . ?
C7 C8 N4 C9 11.4(5) . . . . ?
C7 C8 N4 N5 -174.9(3) . . . . ?
N6 C10 N5 N4 0.0(4) . . . . ?
N6 C10 N5 Cu2 171.0(2) . . . 3_566 ?
C9 N4 N5 C10 0.1(3) . . . . ?
C8 N4 N5 C10 -174.8(3) . . . . ?
C9 N4 N5 Cu2 -171.4(2) . . . 3_566 ?
C8 N4 N5 Cu2 13.7(4) . . . 3_566 ?
N4 C9 N6 C10 0.2(3) . . . . ?
N4 C9 N6 Cu1 -176.1(2) . . . 2_546 ?
N5 C10 N6 C9 -0.1(4) . . . . ?
N5 C10 N6 Cu1 175.5(2) . . . 2_546 ?
O2 Mo1 O1 Cu1 48.9(2) . . . . ?
O3 Mo1 O1 Cu1 150.80(16) . . . . ?
O5 Mo1 O1 Cu1 -51.85(19) . . . . ?
O12 Mo1 O1 Cu1 -127.36(17) 3_676 . . . ?
O4 Mo1 O1 Cu1 -141.5(3) . . . . ?
Mo2 Mo1 O1 Cu1 -81.48(17) . . . . ?
Mo3 Mo1 O1 Cu1 146.80(12) . . . . ?
N6 Cu1 O1 Mo1 32.4(2) 2_556 . . . ?
N2 Cu1 O1 Mo1 -125.84(18) . . . . ?
O7 Cu1 O1 Mo1 128.55(18) 3_576 . . . ?
O1 Mo1 O2 Cu2 138.84(18) . . . . ?
O3 Mo1 O2 Cu2 34.8(2) . . . . ?
O5 Mo1 O2 Cu2 -118.10(19) . . . . ?
O12 Mo1 O2 Cu2 -52.7(4) 3_676 . . . ?
O4 Mo1 O2 Cu2 -38.86(19) . . . . ?
Mo2 Mo1 O2 Cu2 -118.77(17) . . . . ?
Mo3 Mo1 O2 Cu2 6.43(18) . . . . ?
N1 Cu2 O2 Mo1 109.3(2) 4_676 . . . ?
N5 Cu2 O2 Mo1 -97.6(2) 3_566 . . . ?
O11 Cu2 O2 Mo1 -7.5(2) . . . . ?
O1 Mo1 O3 Mo3 -174.19(12) . . . . ?
O2 Mo1 O3 Mo3 -67.51(13) . . . . ?
O5 Mo1 O3 Mo3 52.5(2) . . . . ?
O12 Mo1 O3 Mo3 93.15(12) 3_676 . . . ?
O4 Mo1 O3 Mo3 18.20(10) . . . . ?
Mo2 Mo1 O3 Mo3 86.84(12) . . . . ?
O10 Mo3 O3 Mo1 172.94(13) . . . . ?
O11 Mo3 O3 Mo1 66.16(14) . . . . ?
O9 Mo3 O3 Mo1 -60.6(2) 3_676 . . . ?
O6 Mo3 O3 Mo1 -96.52(12) 3_676 . . . ?
O4 Mo3 O3 Mo1 -18.73(11) . . . . ?
Mo2 Mo3 O3 Mo1 -92.02(11) 3_676 . . . ?
O6 As1 O4 Mo3 129.31(12) . . . . ?
O12 As1 O4 Mo3 4.41(16) . . . . ?
C11 As1 O4 Mo3 -111.47(14) . . . . ?
O6 As1 O4 Mo1 1.18(17) . . . . ?
O12 As1 O4 Mo1 -123.72(13) . . . . ?
C11 As1 O4 Mo1 120.39(14) . . . . ?
O10 Mo3 O4 As1 -64.2(5) . . . . ?
O11 Mo3 O4 As1 128.52(14) . . . . ?
O9 Mo3 O4 As1 28.83(13) 3_676 . . . ?
O3 Mo3 O4 As1 -130.49(14) . . . . ?
O6 Mo3 O4 As1 -47.81(12) 3_676 . . . ?
Mo2 Mo3 O4 As1 -1.79(12) 3_676 . . . ?
Mo1 Mo3 O4 As1 -143.26(16) . . . . ?
O10 Mo3 O4 Mo1 79.0(4) . . . . ?
O11 Mo3 O4 Mo1 -88.22(8) . . . . ?
O9 Mo3 O4 Mo1 172.09(8) 3_676 . . . ?
O3 Mo3 O4 Mo1 12.76(7) . . . . ?
O6 Mo3 O4 Mo1 95.45(7) 3_676 . . . ?
Mo2 Mo3 O4 Mo1 141.46(5) 3_676 . . . ?
O1 Mo1 O4 As1 58.7(5) . . . . ?
O2 Mo1 O4 As1 -131.34(15) . . . . ?
O3 Mo1 O4 As1 129.30(15) . . . . ?
O5 Mo1 O4 As1 -33.37(14) . . . . ?
O12 Mo1 O4 As1 43.95(13) 3_676 . . . ?
Mo2 Mo1 O4 As1 -2.03(12) . . . . ?
Mo3 Mo1 O4 As1 142.35(17) . . . . ?
O1 Mo1 O4 Mo3 -83.7(4) . . . . ?
O2 Mo1 O4 Mo3 86.31(9) . . . . ?
O3 Mo1 O4 Mo3 -13.06(8) . . . . ?
O5 Mo1 O4 Mo3 -175.72(8) . . . . ?
O12 Mo1 O4 Mo3 -98.40(7) 3_676 . . . ?
Mo2 Mo1 O4 Mo3 -144.38(5) . . . . ?
O8 Mo2 O5 Mo1 176.13(11) . . . . ?
O7 Mo2 O5 Mo1 69.84(12) . . . . ?
O9 Mo2 O5 Mo1 -51.9(2) . . . . ?
O12 Mo2 O5 Mo1 -18.46(9) 3_676 . . . ?
O6 Mo2 O5 Mo1 -94.05(11) . . . . ?
Mo3 Mo2 O5 Mo1 -86.28(11) 3_676 . . . ?
O1 Mo1 O5 Mo2 -72.66(12) . . . . ?
O2 Mo1 O5 Mo2 -178.99(11) . . . . ?
O3 Mo1 O5 Mo2 60.8(2) . . . . ?
O12 Mo1 O5 Mo2 18.97(9) 3_676 . . . ?
O4 Mo1 O5 Mo2 94.22(11) . . . . ?
Mo3 Mo1 O5 Mo2 90.52(10) . . . . ?
O4 As1 O6 Mo3 -126.77(13) . . . 3_676 ?
O12 As1 O6 Mo3 -1.56(17) . . . 3_676 ?
C11 As1 O6 Mo3 113.84(15) . . . 3_676 ?
O4 As1 O6 Mo2 1.24(17) . . . . ?
O12 As1 O6 Mo2 126.45(13) . . . . ?
C11 As1 O6 Mo2 -118.15(15) . . . . ?
O8 Mo2 O6 As1 129.23(15) . . . . ?
O7 Mo2 O6 As1 -75.6(4) . . . . ?
O5 Mo2 O6 As1 29.23(14) . . . . ?
O9 Mo2 O6 As1 -128.68(15) . . . . ?
O12 Mo2 O6 As1 -45.29(13) 3_676 . . . ?
Mo1 Mo2 O6 As1 -2.08(13) . . . . ?
Mo3 Mo2 O6 As1 -142.04(17) 3_676 . . . ?
O8 Mo2 O6 Mo3 -88.73(9) . . . 3_676 ?
O7 Mo2 O6 Mo3 66.5(3) . . . 3_676 ?
O5 Mo2 O6 Mo3 171.27(8) . . . 3_676 ?
O9 Mo2 O6 Mo3 13.35(8) . . . 3_676 ?
O12 Mo2 O6 Mo3 96.75(7) 3_676 . . 3_676 ?
Mo1 Mo2 O6 Mo3 139.96(5) . . . 3_676 ?
O8 Mo2 O7 Cu1 78.06(15) . . . 3_576 ?
O5 Mo2 O7 Cu1 -178.48(12) . . . 3_576 ?
O9 Mo2 O7 Cu1 -25.85(14) . . . 3_576 ?
O12 Mo2 O7 Cu1 -105.39(13) 3_676 . . 3_576 ?
O6 Mo2 O7 Cu1 -76.4(4) . . . 3_576 ?
Mo1 Mo2 O7 Cu1 -149.30(12) . . . 3_576 ?
Mo3 Mo2 O7 Cu1 -22.18(17) 3_676 . . 3_576 ?
O8 Mo2 O9 Mo3 68.78(13) . . . 3_676 ?
O7 Mo2 O9 Mo3 174.18(12) . . . 3_676 ?
O5 Mo2 O9 Mo3 -62.8(2) . . . 3_676 ?
O12 Mo2 O9 Mo3 -95.24(11) 3_676 . . 3_676 ?
O6 Mo2 O9 Mo3 -18.89(10) . . . 3_676 ?
Mo1 Mo2 O9 Mo3 -92.08(12) . . . 3_676 ?
O10 Mo3 O11 Cu2 -131.88(19) . . . . ?
O9 Mo3 O11 Cu2 125.20(19) 3_676 . . . ?
O3 Mo3 O11 Cu2 -29.8(2) . . . . ?
O6 Mo3 O11 Cu2 57.5(4) 3_676 . . . ?
O4 Mo3 O11 Cu2 45.27(19) . . . . ?
Mo2 Mo3 O11 Cu2 127.05(15) 3_676 . . . ?
Mo1 Mo3 O11 Cu2 -2.17(18) . . . . ?
N1 Cu2 O11 Mo3 -85.1(2) 4_676 . . . ?
N5 Cu2 O11 Mo3 117.1(2) 3_566 . . . ?
O2 Cu2 O11 Mo3 4.5(2) . . . . ?
O4 As1 O12 Mo1 131.92(14) . . . 3_676 ?
O6 As1 O12 Mo1 7.17(18) . . . 3_676 ?
C11 As1 O12 Mo1 -110.14(16) . . . 3_676 ?
O4 As1 O12 Mo2 -5.73(16) . . . 3_676 ?
O6 As1 O12 Mo2 -130.48(13) . . . 3_676 ?
C11 As1 O12 Mo2 112.21(15) . . . 3_676 ?
 
_diffrn_measured_fraction_theta_max    0.994
_diffrn_reflns_theta_full              26.37
_diffrn_measured_fraction_theta_full   0.994
_refine_diff_density_max    0.862
_refine_diff_density_min   -1.067
_refine_diff_density_rms    0.096
